# Supplementary material for: Steric and dispersion effect of chiral diphosphine ligand on copper-catalyzed enantioselective incorporation of CO2with styrene: a computational study
Source: Royal Society of Chemistry journal article supplement (doi:10.1039/d3nj02522e), 2023-01-01
Supplement: d3nj02522e1.pdf [file d3nj02522e1.pdf]

## Supporting Information

### Steric and dispersion effect of chiral diphosphine ligand on copper-catalyzed enantioselective incorporation of CO<sub>2</sub> with styrene: A computational study

*Weiyi Li,<sup>\*a</sup> Caiqin Li,<sup>b</sup> and Geng Leng<sup>c,d</sup>*

<sup>a</sup> School of Science, Key Laboratory of High Performance Scientific Computation,  
Xihua University, Chengdu, Sichuan, 610039, P. R. China.

<sup>b</sup> School of Chemistry and Chemical Engineering, Shanxi Datong University, Datong,  
037009, P. R. China.

<sup>c</sup> School of Resources and Environment, University of Electronic Science and  
Technology of China, Chengdu, 611731, P. R. China.

<sup>d</sup> Tianfu Co-innovation center, University of Electronic Science and Technology of  
China, Chengdu, 610299, PR China

#### CONTENTS:

|                                                                                                                            |    |
|----------------------------------------------------------------------------------------------------------------------------|----|
| S1: Computational details.....                                                                                             | 2  |
| S2: A benchmark study for test the reliability of the computational method.....                                            | 3  |
| S3: Supplementary calculations.....                                                                                        | 4  |
| S4: Details for computing dispersion interaction energies between substituents on the<br>ligand and on the substrate ..... | 17 |
| S4: Energy summary.....                                                                                                    | 19 |
| S5: Cartesian coordinates of the optimized structures involved in this work.....                                           | 22 |

## S1: Computational details

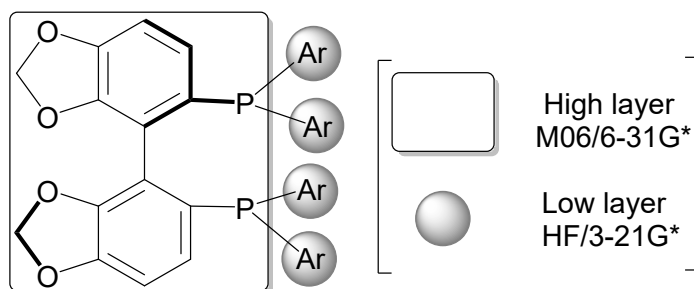

(*R*)-SEGPHOS ligand

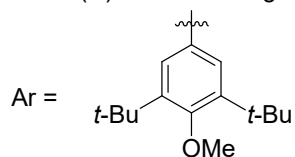

(*R*)-DTBM-SEGPHOS (**L1**)

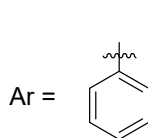

(*R*)-SEGPHOS (**L2**)

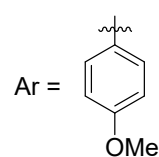

(*R*)-OMe-SEGPHOS (**L3**)

Optimization and frequency calculation in gas phase: ONIOM[M06/6-31G\*//HF/3-21G\*]

Int = ultrafine and SCF keywords were used

Single-point energy calculation: M06/6-31++G\*\* 5d

For single-point energy calculation, the SCRF = (SMD, ExternalIteration, Cyclohexane) keyword was used.

## S2: A benchmark study for test the reliability of the computational method

To probe the reliability of the ONIOM[M06/6-31G\*//HF/3-21G\*] method used for the present computational study, the competing diastereoisomeric TSs in the **L2**-CuH system were re-optimized with full DFT calculations at the M06/6-31G\* level. Then, single-point energy in cyclohexane solvent was calculated at the M06/6-31++G\*\* level on the M06/6-31G\*-optimized structures using the continuum solvation model (SMD). This approach is labeled as the Method II. As shown in Figure S1, for both of 1,2-hydrocupration and CO<sub>2</sub> insertion into Cu–C bond steps, the calculated free energy differences ( $\Delta\Delta G_1^\ddagger$  and  $\Delta\Delta G_2^\ddagger$ ) between the corresponding competing diastereoisomeric TSs are comparable using the two methods. Thus, we can believe that the present ONIOM calculations for the SEGPHOS ligands is acceptable.

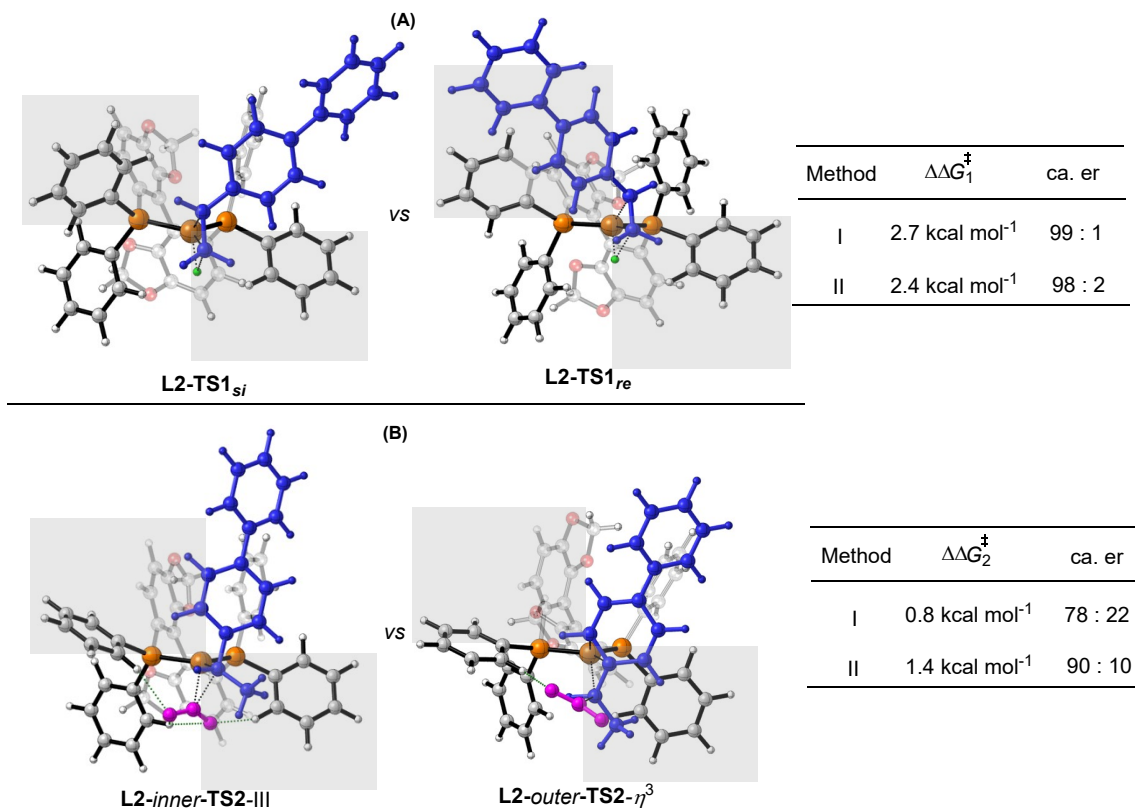

**Figure S1.** (A) Optimized structures of the two diastereoisomeric TSs for 1,2-hydrocupration of **1a** with the **L2**-CuH catalyst. (B) Optimized structures of the two competing TSs for *inner*- and *outer*-sphere CO<sub>2</sub> attack of the (*S*)-alkylcopper(I) IM **L2**-(*S*)-**IM1**.

### S3: Supplementary calculations

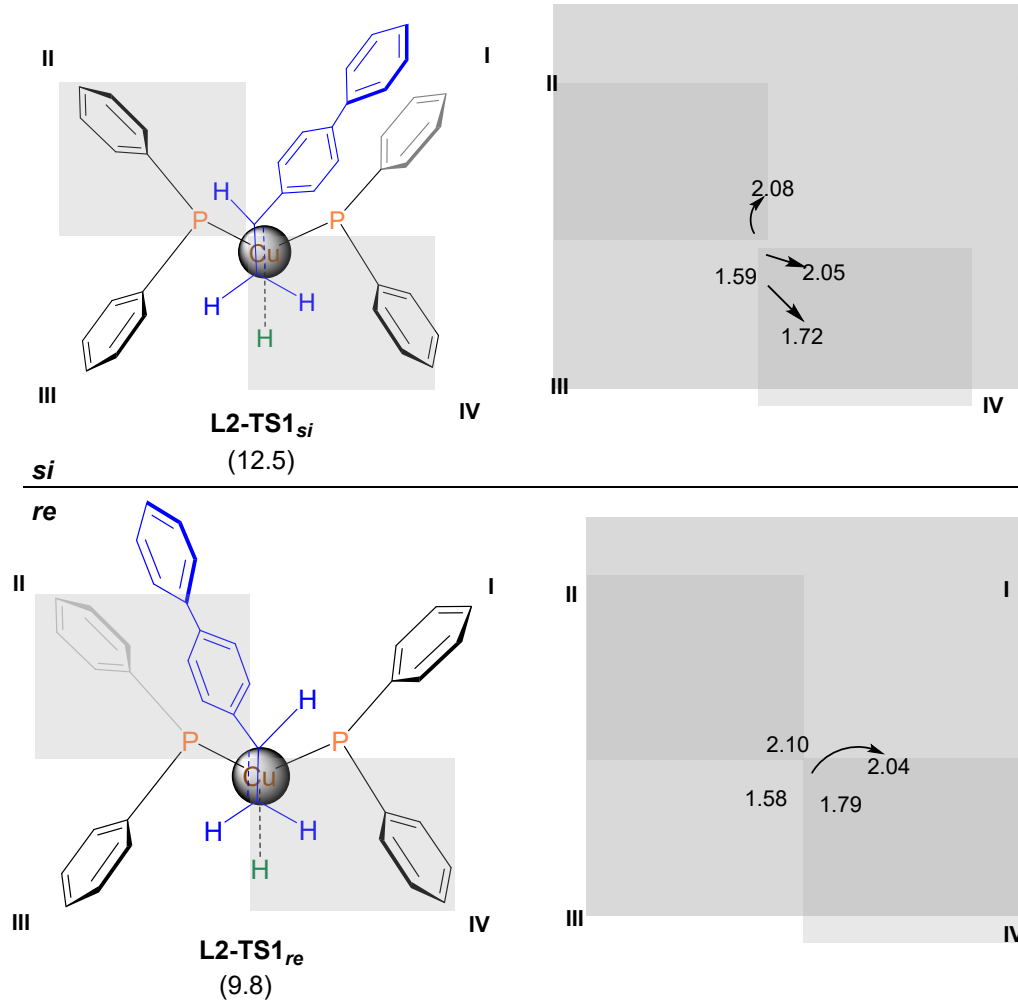

**Figure S2.** Optimized structures of the two diastereoisomeric TSs for 1,2-hydrocupration of **1a** with the **L2-CuH** catalyst. The substrate moiety is highlight in blue. The relative free energy (in kcal mol<sup>-1</sup>) are given in parenthesis. The critical atomic distances are labeled in Å.

(A) Distortion/interaction analysis

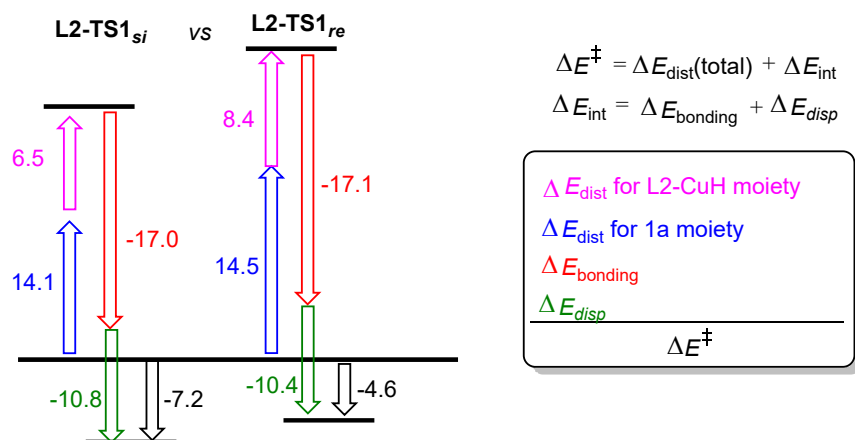

(B) Intermolecular non-covalent interactions

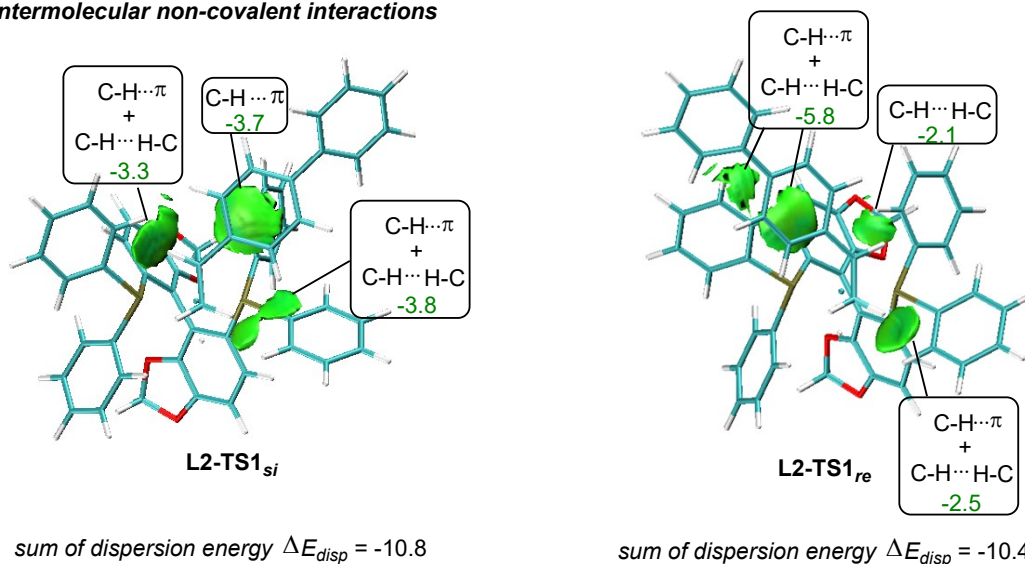

**Figure S3.** Origin of enantioselectivity in the 1,2-hydrocupration of **1a** with the L2-CuH catalyst. (A) Distortion/interaction analysis. (B) Visualization of intermolecular NCI analysis. The buried surface areas ( $\text{\AA}^2$ ) and dispersion energy (in  $\text{kcal mol}^{-1}$ ) are provided below.

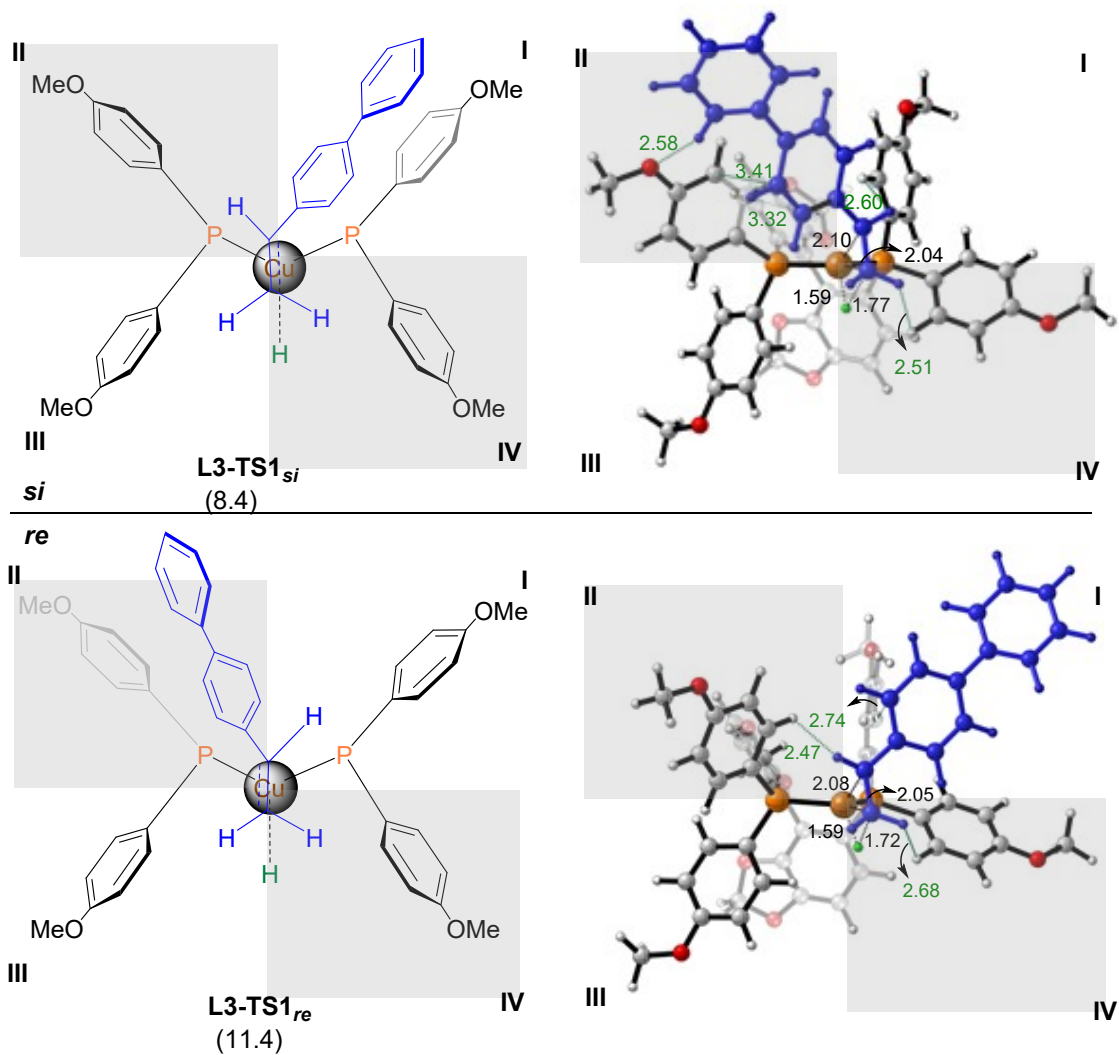

**Figure S4.** Optimized structures of the two diastereomeric TSs for 1,2-hydrocupration of **1a** with the L3-CuH catalyst. The substrate moiety is highlight in blue. The relative free energy (in kcal mol<sup>-1</sup>) are given in parenthesis. The critical atomic distances are labeled in Å.

(A) Distortion/interaction analysis

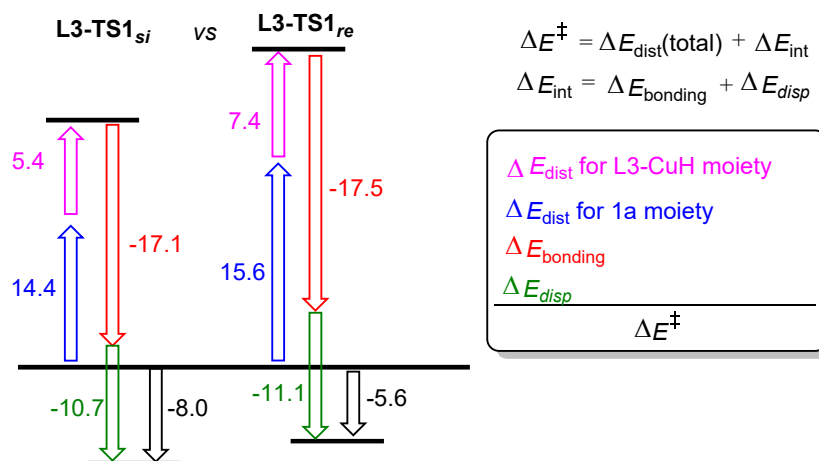

(B) Intermolecular non-covalent interactions

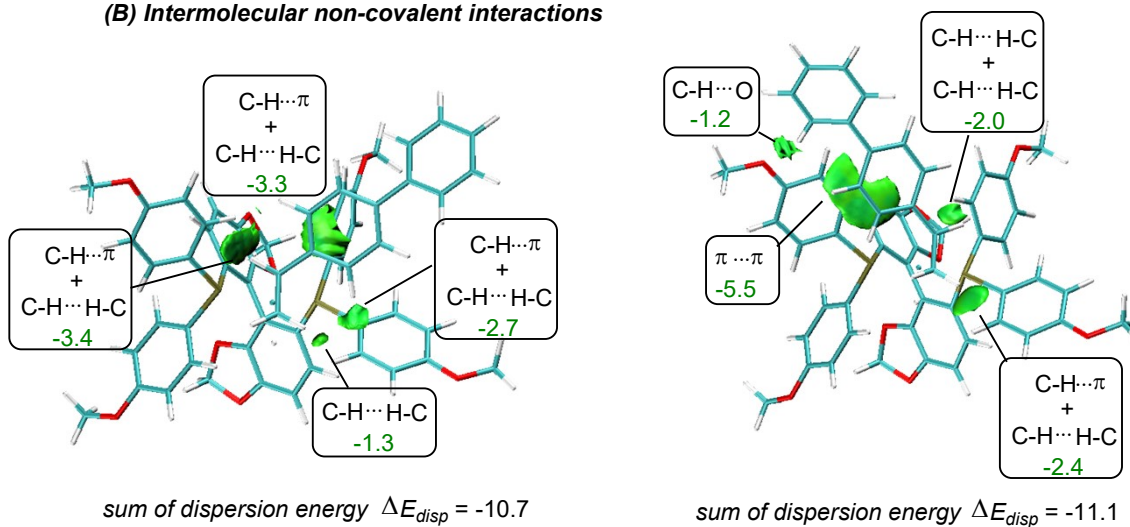

**Figure S5.** Origin of enantioselectivity in the 1,2-hydrocupration of **1a** with the L3-CuH catalyst. (A) Distortion/interaction analysis. (B) Visualization of intermolecular NCI analysis. The buried surface areas ( $\text{\AA}^2$ ) and dispersion energy (in  $\text{kcal mol}^{-1}$ ) are provided below.

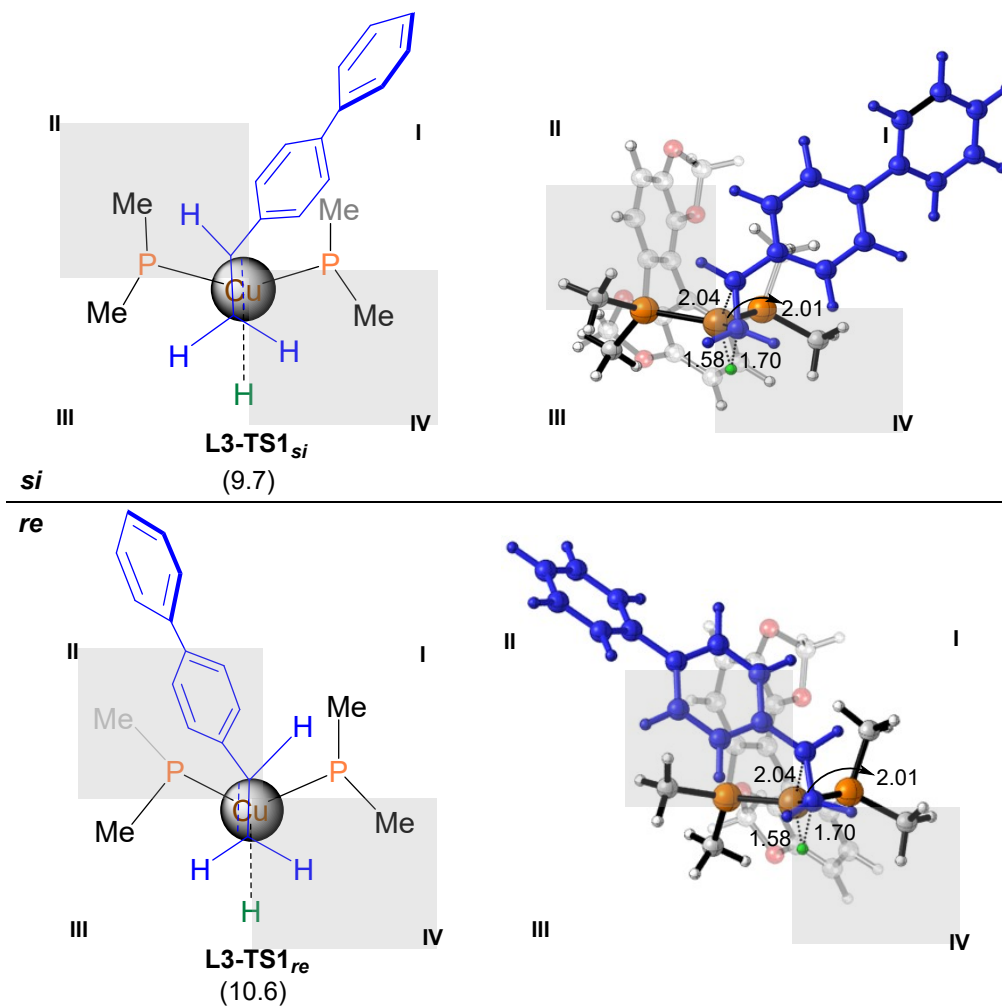

**Figure S6.** Optimized structures of the two diastereoisomeric TSs for 1,2-hydrocupration of 1a with the L4-CuH catalyst. The substrate moiety is highlight in blue. The relative free energy (in kcal mol<sup>-1</sup>) are given in parenthesis. The critical atomic distances are labeled in Å.



(A) Distortion/interaction analysis

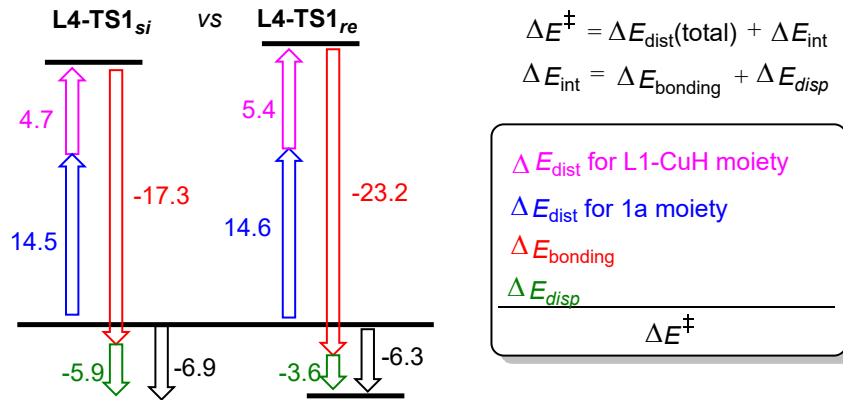

(B) Intermolecular non-covalent interactions

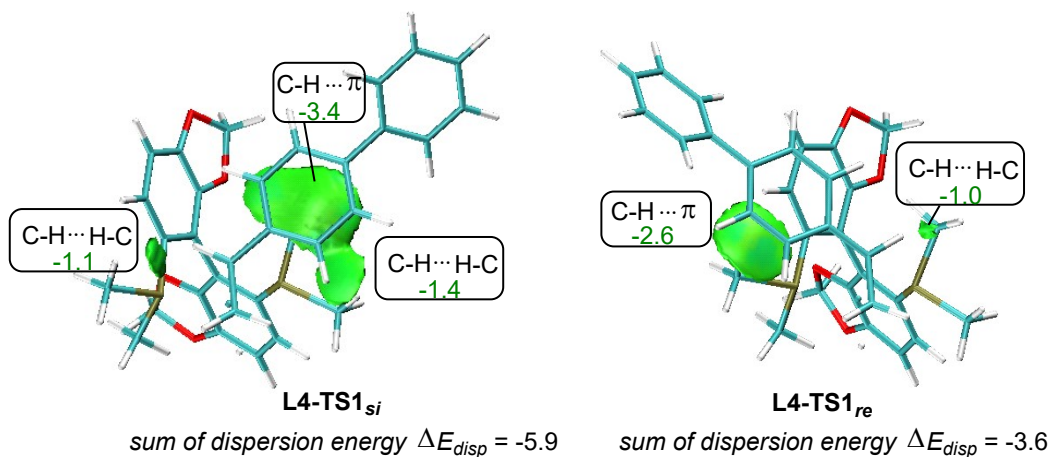

**Figure S7.** Origin of enantioselectivity in the 1,2-hydrocupration of **1a** with the L4-CuH catalyst. (A) Distortion/interaction analysis. (B) Visualization of intermolecular NCI analysis. The buried surface areas ( $\text{\AA}$ ) and dispersion energy (in  $\text{kcal mol}^{-1}$ ) are provided below.

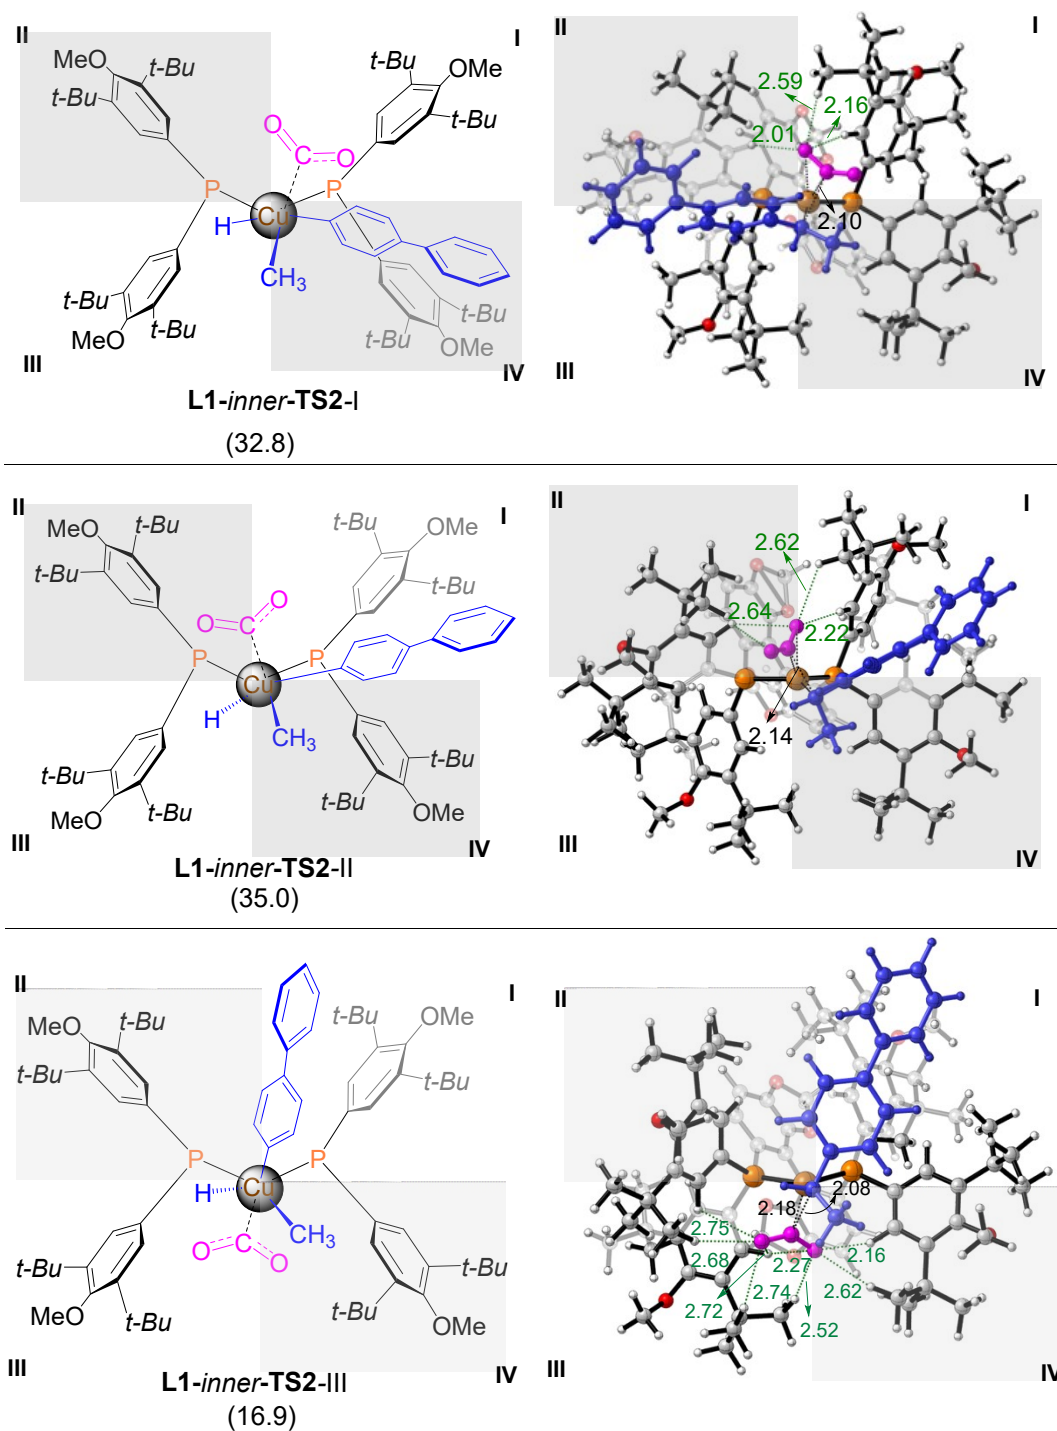

**Figure S8.** Optimized geometries of three possible TSs for the *inner-sphere* CO<sub>2</sub> attack of the L1-ligated (*S*)-alkylcopper(I) IM. The substrate and CO<sub>2</sub> moiety is highlight in blue and pink, respectively. The free energy barriers relative to free (*S*)-alkylcopper(I) IM L1-(*S*)-IM1 and CO<sub>2</sub> are given in kcal mol<sup>-1</sup>. The critical atomic distances are labeled in Å.

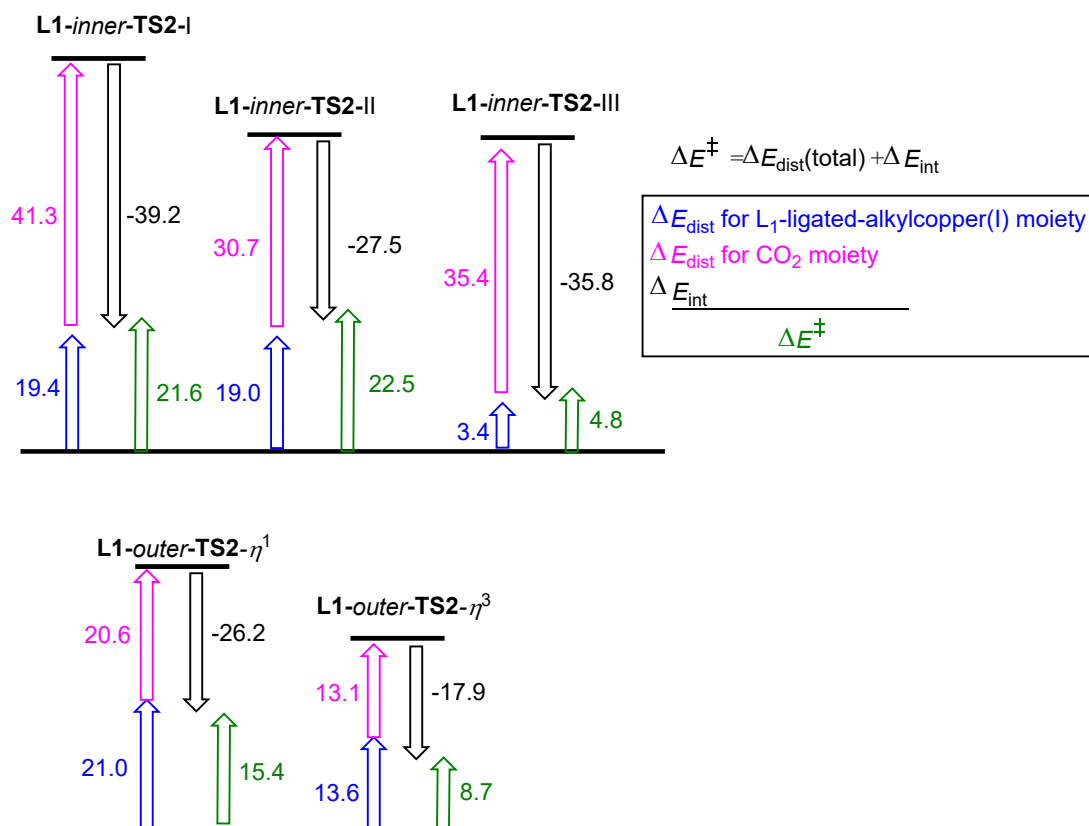

**Figure S9.** Distortion/interaction analysis of the TSs for CO<sub>2</sub> attack of the L1-ligated (*S*)-alkylcopper(I) IM .

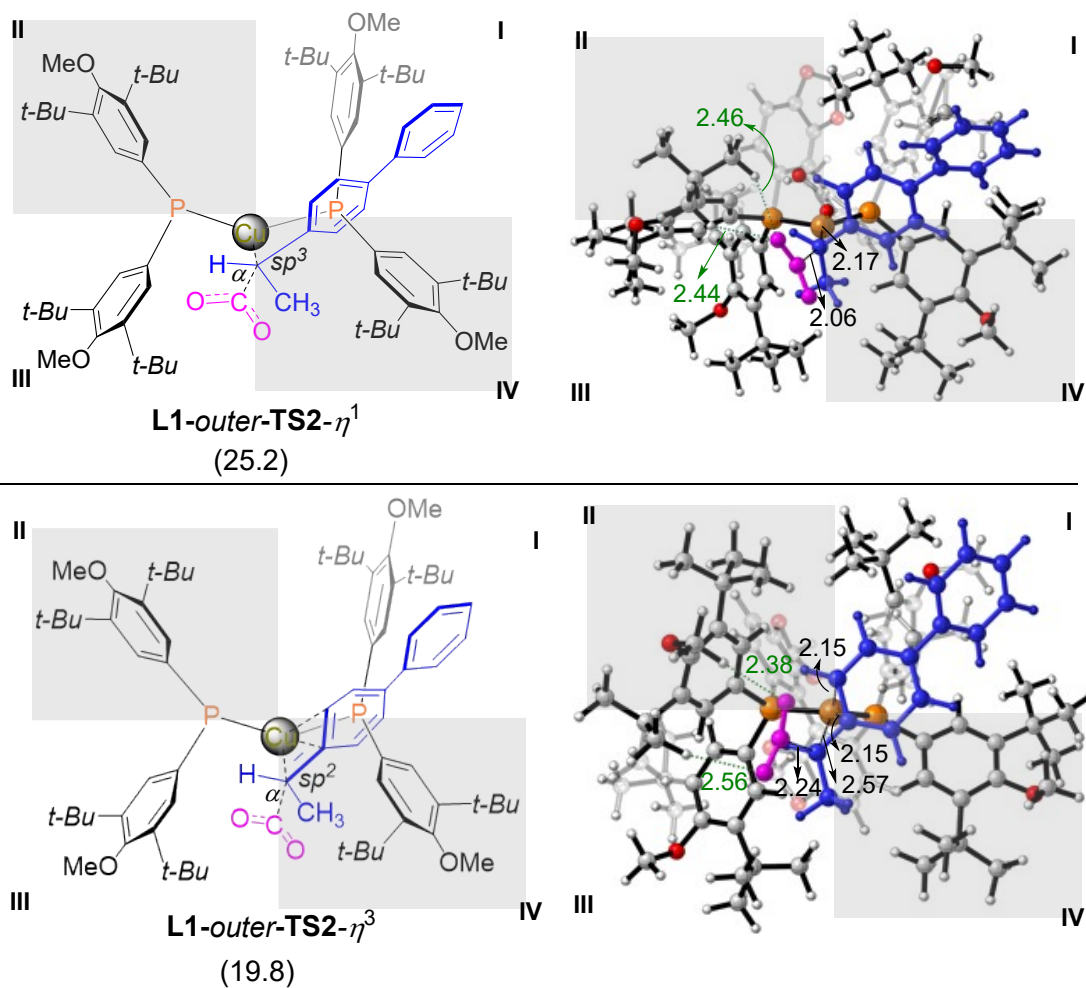

**Figure S10.** Optimized geometries of TSs for the *outer*-sphere CO<sub>2</sub> insertion into insertion into the (*S*)-alkylcopper(I) IM L1-(*S*)-IM1. The substrate and CO<sub>2</sub> moiety is highlight in blue and pink, respectively. The free energy barriers relative to free (*S*)-alkylcopper(I) IM L1-(*S*)-IM1 and CO<sub>2</sub> are given in kcal mol<sup>-1</sup>. The critical atomic distances are labeled in Å.

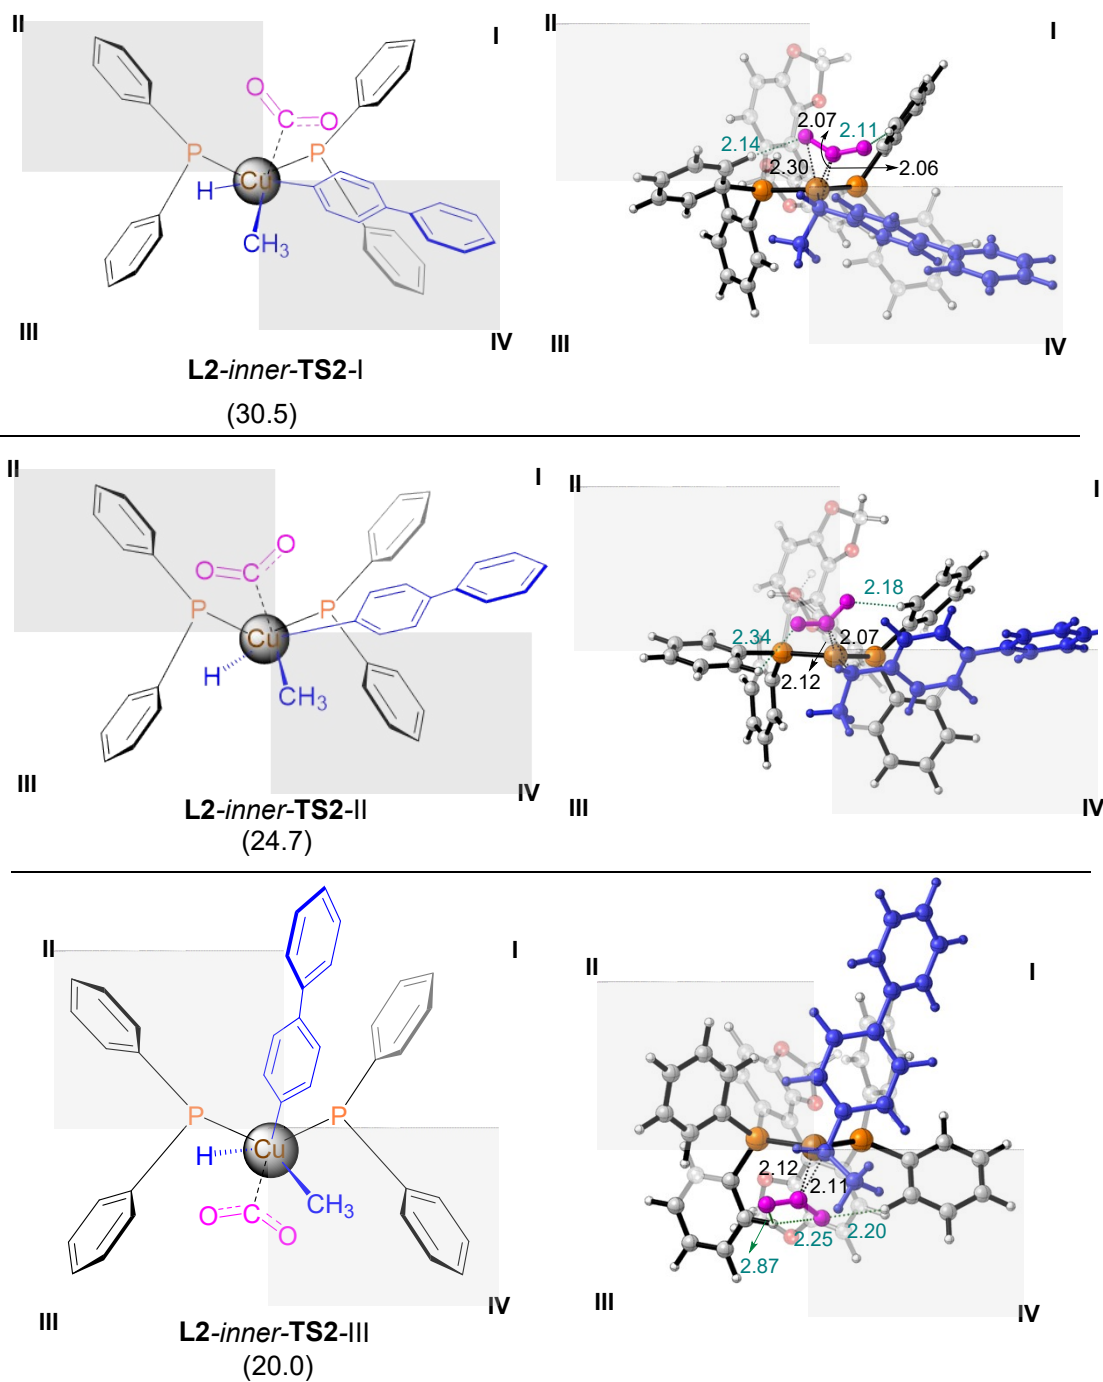

**Figure S11.** Optimized geometries of three possible TSs for the *inner*-sphere CO<sub>2</sub> attack of the L2-ligated (*S*)-alkylcopper(I) IM. The substrate and CO<sub>2</sub> moiety is highlight in blue and pink, respectively. The free energy barrier relative to free (*S*)-alkylcopper(I) IM L2-(*S*)-IM1 and CO<sub>2</sub> are given in kcal mol<sup>-1</sup>. The critical atomic distances are labeled in Å.

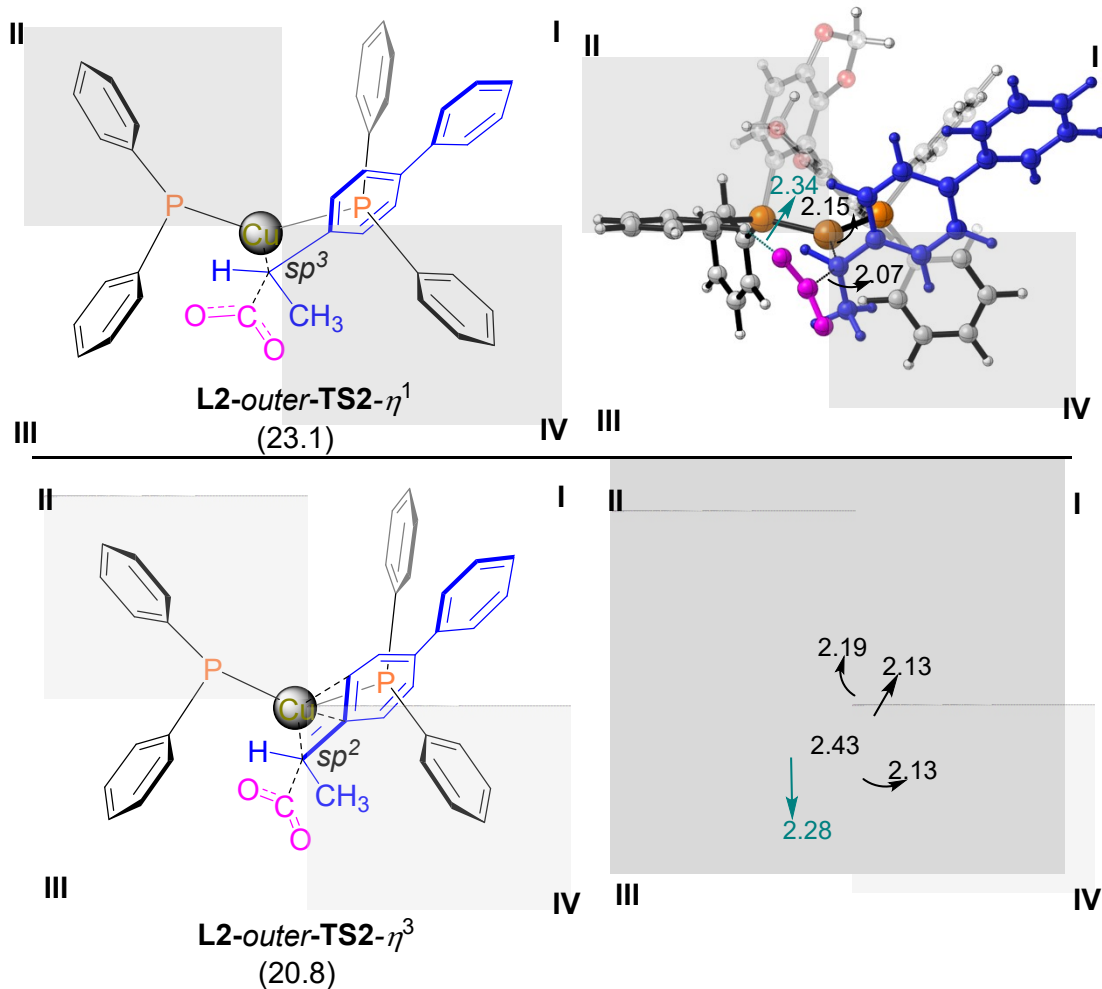

**Figure S12.** Optimized geometries of three possible TSs for the *inner*-sphere CO<sub>2</sub> attack of the L2-ligated (*S*)-alkylcopper(I) IM. The substrate and CO<sub>2</sub> moiety is highlight in blue and pink, respectively. The free energy barrier relative to free (*S*)-alkylcopper(I) IM L2-(*S*)-IM1 and CO<sub>2</sub> are given in kcal mol<sup>-1</sup>. The critical atomic distances are labeled in Å.

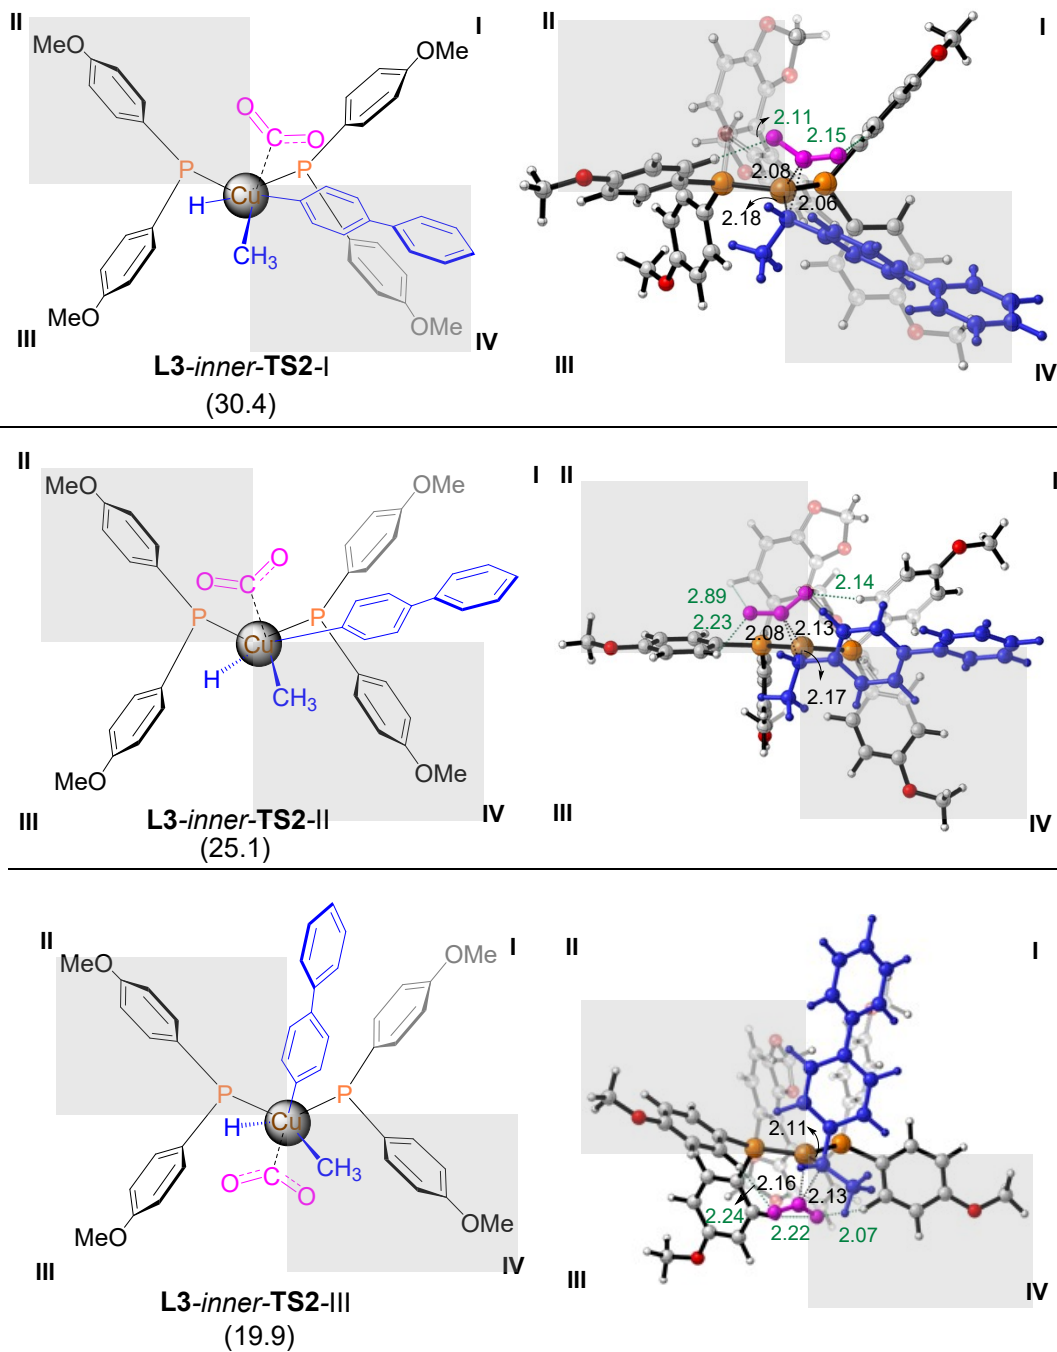

**Figure S13.** Optimized geometries of three possible TSs for the *inner*-sphere  $\text{CO}_2$  attack of the L3-ligated (*S*)-alkylcopper(I) IM. The substrate and  $\text{CO}_2$  moiety is highlight in blue and pink, respectively. The free energy barrier relative to free (*S*)-alkylcopper(I) IM L3-(*S*)-IM1 and  $\text{CO}_2$  are given in  $\text{kcal mol}^{-1}$ . The critical atomic distances are labeled in Å.

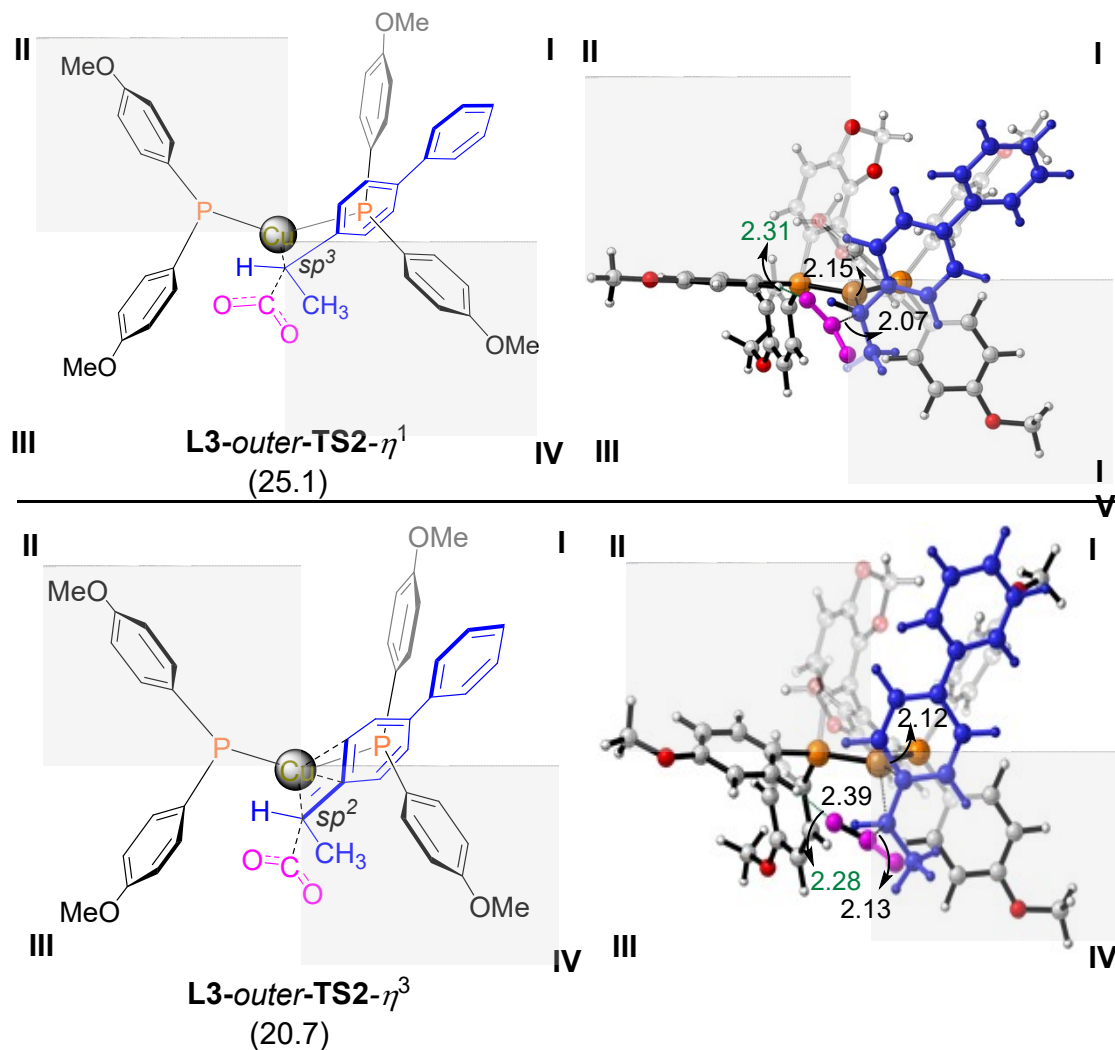

**Figure S14.** Optimized geometries of three possible TSs for the *inner*-sphere CO<sub>2</sub> attack of the L3-ligated (*S*)-alkylcopper(I) IM. The substrate and CO<sub>2</sub> moiety is highlight in blue and pink, respectively. The free energy barrier relative to free (*S*)-alkylcopper(I) IM L3-(*S*)-IM1 and CO<sub>2</sub> are given in kcal mol<sup>-1</sup>. The critical atomic distances are labeled in Å.



#### S4: Details for computing dispersion interaction energies between substituents on the ligand and on the substrate

For the 1,2-hydrocupration step, the dispersion interaction energies ( $\Delta E_{\text{disp}}$ ) between the *P*-substituents of the ligand and the substituents of the substrate **1a** in the transition states (**TS1s**) were computed using the following procedures. First, a van der Waals complex between the substituent on the ligand and the substituent on the substrate were built using the optimized TS geometry by removing other atoms. An H atom was added to convert each substituent to a closed-shell molecule by replacing the removed C–C or C–P bond with a C–H bond with a distance of 1.07 Å. The dispersion interaction energy ( $\Delta E_{\text{disp}}$ ) was calculated using the Eq. 1.

$$\Delta E_{\text{disp}} = E_{\text{disp}}(\text{lig+sub}) - [E_{\text{disp}}(\text{sub}) + E_{\text{disp}}(\text{lig})] \quad \text{Eq. 1}$$

In Eq.1,  $E_{\text{disp}}(\text{lig+sub})$  is the dispersion energy of the van der Waals complex of substituents on the ligand and on the substrate,  $E_{\text{disp}}(\text{sub})$  and  $E_{\text{disp}}(\text{lig})$  represent the dispersion energies of the substituent on the substrate and the substituent on the ligand, respectively. Here, the dispersion energies (*i.e.*  $E_{\text{disp}}(\text{lig+sub})$ ,  $E_{\text{disp}}(\text{sub})$ , and  $E_{\text{disp}}(\text{lig})$ ) were calculated with Grimme's DFT-D3 program using HF as the reference "functional" and zero-damping. Because the HF method can be considered "dispersion-free", the D3 dispersion correction for HF describes the overall dispersion energy for each fragment. Then, the dispersion energy component of the interaction energy between the two substituents (*i.e.* the dispersion interaction energy,  $\Delta E_{\text{disp}}$ ) can be calculated using Eq. 1. This approach for dispersion energy calculations have been previously reported in the literature.<sup>1-4</sup>

For the CO<sub>2</sub> insertion into the Cu–C bond step, the dispersion interaction energies ( $\Delta E_{\text{disp}}$ ) between the *P*-substituents of the ligand and oxygen atoms of CO<sub>2</sub> in the transition states (**TS2s**) were also computed using the similar procedures as aforementioned.

#### Reference.

1. Goerigk, L.; Collyer, C. A.; Reimers, J. R., Recommending Hartree – Fock Theory with London-Dispersion and Basis-Set-Superposition Corrections for the Optimization or Quantum Refinement of Protein Structures. *J. Phys. Chem. B* **2014**, *118*, 14612-14626.

2. Kruse, H.; Grimme, S., A geometrical correction for the inter- and intra-molecular basis set superposition error in Hartree-Fock and density functional theory calculations for largesystems. *J. Chem. Phys.* **2012**, *136*, 154101.
3. Lu, G.; Liu, R. Y.; Yang, Y.; Fang, C.; Lambrecht, D. S.; Buchwald, S. L.; Liu, P. Ligand - Substrate Dispersion Facilitates the Copper-Catalyzed Hydroamination of Unactivated Olefins. *J. Am. Chem. Soc.* **2017**, *139*, 16548-16555.
4. Dong, Y.; Schuppe, A. W.; Mai, B. K.; Liu, P.; Buchwald, S. L. Confronting the Challenging Asymmetric Carbonyl 1,2-Addition Using Vinyl Heteroarene Pronucleophiles: Ligand-Controlled Regiodivergent Processes through a Dearomatized Allyl-Cu Species. *J. Am. Chem. Soc.* **2022**, *144*, 5985-5995.

## S4: Energy summary

**Table S1** Energies of the stationary points involved **L1-CuH** system.

| Species                                 | $H_c^a$<br>(a.u.) | $G_c^b$<br>(a.u.) | $E_{sol}^c$<br>(a.u.) | $\Delta H_{sol}^d$<br>(kcal mol <sup>-1</sup> ) | $\Delta G_{sol}^e$<br>(kcal mol <sup>-1</sup> ) |
|-----------------------------------------|-------------------|-------------------|-----------------------|-------------------------------------------------|-------------------------------------------------|
| CO <sub>2</sub>                         | 0.01576           | -0.00994          | -188.50557            | -                                               | -                                               |
| <b>1a</b>                               | 0.22719           | 0.17422           | -540.30333            | -                                               | -                                               |
| <b>L1-CuH</b>                           | 1.80391           | 1.59492           | -5803.03003           | -                                               | -                                               |
| <b>L1-TS1<sub>si</sub></b>              | 2.03262           | 1.79782           | -6343.34528           | -8.4                                            | 8.6                                             |
| <b>L1-TS1<sub>re</sub></b>              | 2.03263           | 1.79900           | -6343.34210           | -6.4                                            | 11.4                                            |
| <b>L1-(S)-IM1</b>                       | 2.03824           | 1.80287           | -6343.39224           | -34.3                                           | -17.7                                           |
| <b>L1-(R)-IM1</b>                       | 2.03818           | 1.80365           | -6343.39369           | -35.3                                           | -18.1                                           |
| <b>L1-inner-TS2-I</b>                   | 2.05479           | 1.81382           | -6531.86341           | -14.2                                           | 15.1                                            |
| <b>L1-inner-TS2-II</b>                  | 2.05445           | 1.81580           | -6531.86188           | -13.4                                           | 17.3                                            |
| <b>L1-inner-TS2-III</b>                 | 2.05511           | 1.81524           | -6529.83209           | -30.8                                           | -0.8                                            |
| <b>L1-outer-TS2-<math>\eta^1</math></b> | 2.05390           | 1.81152           | -6531.87331           | -20.9                                           | 7.5                                             |
| <b>L1-outer-TS2-<math>\eta^3</math></b> | 2.05403           | 1.81347           | -6531.88388           | -27.5                                           | 2.1                                             |
| <b>L1-(S)-IM2</b>                       | 2.05763           | 1.81617           | -6531.94430           | -63.1                                           | -34.1                                           |
| <b>L1-(R)-IM2</b>                       | 2.05771           | 1.81701           | -6531.93004           | -54.1                                           | -24.7                                           |

*a:*  $H_c$  is the enthalpy correction calculated at the ONIOM(M06/6-31G\*\*/HF/3-21G\*) level in gas phase at 313.15 K;

*b:*  $G_c$  is the Gibbs free energy correction calculated at the ONIOM(M06/6-31G\*\*/HF/3-21G\*) level in gas phase at 313.15 K;

*c:*  $E_{sol}$  is the electron energy in the solvent after PCM correction calculated at the M06/6-31++G\*\* level;

*d:*  $\Delta H_{sol}$  is the relative enthalpy energy in the solvent at 298 K.  $H_{sol} = H_c + E_{sol} + 0.00301$ .

*e:*  $\Delta G_{sol}$  is the relative Gibbs free energy in the solvent at 298 K.  $G_{sol} = G_c + E_{sol} + 0.00301$ .

**Table S2** Energies of the stationary points involved **L2-CuH** system.

| Species                                 | $H_c$<br>(a.u.) | $G_c$<br>(a.u.) | $E_{sol}$<br>(a.u.) | $\Delta H_{sol}$<br>(kcal mol <sup>-1</sup> ) | $\Delta G_{sol}$<br>(kcal mol <sup>-1</sup> ) |
|-----------------------------------------|-----------------|-----------------|---------------------|-----------------------------------------------|-----------------------------------------------|
| <b>L2-CuH</b>                           | 0.63834         | 0.53081         | -4088.12698         | -                                             | -                                             |
| <b>L2-TS1<sub>si</sub></b>              | 0.86856         | 0.73438         | -4628.44320         | -7.9                                          | 9.8                                           |
| <b>L2-TS1<sub>re</sub></b>              | 0.86864         | 0.86864         | -4628.43909         | -5.3                                          | 12.5                                          |
| <b>L2-(S)-IM1</b>                       | 0.87360         | 0.73732         | -4628.48644         | -31.9                                         | -15.6                                         |
| <b>L2-(R)-IM1</b>                       | 0.87368         | 0.73801         | -4628.48649         | -31.8                                         | -15.1                                         |
| <b>L2-inner-TS2-I</b>                   | 0.89043         | 0.74947         | -4816.96248         | -14.5                                         | 15.0                                          |
| <b>L2-inner-TS2-II</b>                  | 0.88971         | 0.74853         | -4816.97075         | -20.2                                         | 9.2                                           |
| <b>L2-inner-TS2-III</b>                 | 0.89087         | 0.75155         | -4816.98133         | -26.1                                         | 4.4                                           |
| <b>L2-outer-TS2-<math>\eta^1</math></b> | 0.88946         | 0.74556         | -4816.97030         | -20.1                                         | 7.6                                           |
| <b>L2-outer-TS2-<math>\eta^3</math></b> | 0.88972         | 0.88972         | -4816.97639         | -23.7                                         | 5.2                                           |
| <b>L2-(S)-IM2</b>                       | 0.89323         | 0.75303         | -4817.02989         | -55.1                                         | -25.1                                         |
| <b>L2-(R)-IM2</b>                       | 0.89289         | 0.75366         | -4817.03141         | -56.3                                         | -25.7                                         |

**Table S3** Energies of the stationary points involved **L3-CuH** system.

| Species                                 | $H_c$<br>(a.u.) | $G_c$<br>(a.u.) | $E_{sol}$<br>(a.u.) | $\Delta H_{sol}$<br>(kcal mol <sup>-1</sup> ) | $\Delta G_{sol}$<br>(kcal mol <sup>-1</sup> ) |
|-----------------------------------------|-----------------|-----------------|---------------------|-----------------------------------------------|-----------------------------------------------|
| <b>L3-CuH</b>                           | 0.78914         | 0.65949         | -4545.99316         | -                                             | -                                             |
| <b>L3-TS1<sub>si</sub></b>              | 1.01942         | 0.86279         | -5086.30922         | -7.9                                          | 8.4                                           |
| <b>L3-TS1<sub>re</sub></b>              | 1.01942         | 0.86383         | -5086.30540         | -5.5                                          | 11.4                                          |
| <b>L3-(S)-IM1</b>                       | 1.02436         | 0.86522         | -5086.35255         | -32.0                                         | -17.3                                         |
| <b>L3-(R)-IM1</b>                       | 1.02441         | 0.86651         | -5086.35300         | -32.3                                         | -16.8                                         |
| <b>L3-inner-TS2-I</b>                   | 1.04126         | 0.87803         | -5274.82948         | -15.2                                         | 13.1                                          |
| <b>L3-inner-TS2-II</b>                  | 1.04079         | 0.87782         | -5274.83772         | -20.7                                         | 7.8                                           |
| <b>L3-inner-TS2-III</b>                 | 1.04169         | 0.87973         | -5274.84784         | -26.5                                         | 2.6                                           |
| <b>L3-outer-TS2-<math>\eta^1</math></b> | 1.03826         | 0.87802         | -5274.83780         | -22.3                                         | 7.8                                           |
| <b>L3-outer-TS2-<math>\eta^3</math></b> | 1.04057         | 0.87656         | -5274.84337         | -24.4                                         | 3.4                                           |
| <b>L3-(S)-IM2</b>                       | 1.04406         | 0.88158         | -5274.89658         | -55.6                                         | -26.8                                         |
| <b>L3-(R)-IM2</b>                       | 1.04351         | 0.88172         | -5274.89679         | -56.1                                         | -26.9                                         |

**Table S4** Energies of the stationary points involved **L4-CuH** system.

| Species                    | $H_c^a$<br>(a.u.) | $G_c^b$<br>(a.u.) | $E_{sol}^c$<br>(a.u.) | $\Delta H_{sol}^d$<br>(kcal mol <sup>-1</sup> ) | $\Delta G_{sol}^e$<br>(kcal mol <sup>-1</sup> ) |
|----------------------------|-------------------|-------------------|-----------------------|-------------------------------------------------|-------------------------------------------------|
| <b>L4-CuH</b>              | 0.38258           | 0.29786           | -3321.74309           | -                                               | -                                               |
| <b>L4-TS1<sub>si</sub></b> | 0.61099           | 0.50147           | -3862.05742           | -8.0                                            | 9.7                                             |
| <b>L4-TS1<sub>re</sub></b> | 0.61108           | 0.50214           | -3862.05653           | -7.4                                            | 10.6                                            |
| <b>L4-(S)-IM1</b>          | 0.61573           | 0.50418           | -3862.09824           | -30.5                                           | -13.7                                           |
| <b>L4-(R)-IM1</b>          | 0.61601           | 0.50505           | -3862.09734           | -29.9                                           | -13.2                                           |

*a:*  $H_c$  is the enthalpy correction calculated at the M06/6-31G\* level in gas phase at 313.15 K;

*b:*  $G_c$  is the Gibbs free energy correction calculated at the M06/6-31G\* level in gas phase at 313.15 K;

*c:*  $E_{sol}$  is the electron energy in the solvent after PCM correction calculated at the M06/6-31++G\*\* level;

*d:*  $\Delta H_{sol}$  is the relative enthalpy energy in the solvent at 298 K.  $H_{sol} = H_c + E_{sol} + 0.00301$ .

*e:*  $\Delta G_{sol}$  is the relative Gibbs free energy in the solvent at 298 K.  $G_{sol} = G_c + E_{sol} + 0.00301$ .

## S5: Cartesian coordinates of the optimized structures involved in this work

### CO<sub>2</sub>

|   |             |             |              |   |              |             |              |
|---|-------------|-------------|--------------|---|--------------|-------------|--------------|
| 6 | 0.000000000 | 0.000000000 | 0.000000000  | 1 | -2.376664000 | 1.812431000 | -5.740144000 |
| 8 | 0.000000000 | 0.000000000 | 1.164130000  | 6 | 3.484216000  | 0.900936000 | -2.452382000 |
| 8 | 0.000000000 | 0.000000000 | -1.164130000 | 6 | 2.845343000  | 0.117567000 | -3.381025000 |

### 1a

|   |              |              |              |    |              |              |              |
|---|--------------|--------------|--------------|----|--------------|--------------|--------------|
| 6 | -0.693332000 | -1.042424000 | -0.307095000 | 6  | 0.711500000  | 0.212826000  | -2.198958000 |
| 6 | -2.075591000 | -0.979807000 | -0.292099000 | 6  | 1.340123000  | 1.076820000  | -1.258388000 |
| 6 | -2.741383000 | 0.203447000  | 0.053617000  | 6  | 2.699199000  | 1.374702000  | -1.394516000 |
| 6 | -1.958625000 | 1.315830000  | 0.380872000  | 6  | -0.711500000 | -0.212826000 | -2.198958000 |
| 6 | -0.573362000 | 1.254674000  | 0.366128000  | 6  | -1.502592000 | 0.206088000  | -3.250430000 |
| 6 | 0.089650000  | 0.073018000  | 0.021557000  | 6  | -2.845343000 | -0.117567000 | -3.381025000 |
| 1 | -0.202437000 | -1.967615000 | -0.607960000 | 6  | -3.484216000 | -0.900936000 | -2.452382000 |
| 1 | -2.649915000 | -1.864523000 | -0.564218000 | 6  | -2.699199000 | -1.374702000 | -1.394516000 |
| 1 | -2.453738000 | 2.246033000  | 0.662130000  | 6  | -1.340123000 | -1.076820000 | -1.258388000 |
| 1 | 0.007303000  | 2.130401000  | 0.654474000  | 15 | 0.466129000  | 1.621458000  | 0.256416000  |
| 6 | -4.199840000 | 0.322558000  | 0.085651000  | 15 | -0.466129000 | -1.621458000 | 0.256416000  |
| 1 | -4.568241000 | 1.312549000  | 0.367402000  | 1  | 4.539245000  | 1.146235000  | -2.538108000 |
| 6 | -5.093951000 | -0.630163000 | -0.186805000 | 1  | 3.168343000  | 2.015018000  | -0.653897000 |
| 1 | -4.809094000 | -1.641718000 | -0.473734000 | 1  | -4.539245000 | -1.146235000 | -2.538108000 |
| 1 | -6.161204000 | -0.430807000 | -0.131987000 | 1  | -3.168343000 | -2.015018000 | -0.653897000 |
| 6 | 1.563071000  | 0.001034000  | 0.003021000  | 6  | -1.502592000 | -2.971899000 | 0.921051000  |
| 6 | 2.230779000  | -1.164536000 | 0.396450000  | 6  | -1.842531000 | -4.116108000 | 0.204398000  |
| 6 | 2.330664000  | 1.096768000  | -0.408552000 | 6  | -1.945911000 | -2.847480000 | 2.217092000  |
| 6 | 3.617901000  | -1.232658000 | 0.378925000  | 6  | -2.545007000 | -5.150307000 | 0.783332000  |
| 1 | 1.651974000  | -2.018375000 | 0.747771000  | 1  | -1.551506000 | -4.183486000 | -0.819333000 |
| 6 | 3.717833000  | 1.030057000  | -0.425932000 | 6  | -2.682795000 | -3.849290000 | 2.853892000  |
| 1 | 1.828493000  | 2.002830000  | -0.746671000 | 1  | -1.688739000 | -1.957707000 | 2.750620000  |
| 6 | 4.367877000  | -0.135374000 | -0.032424000 | 6  | -2.880017000 | -5.031495000 | 2.150408000  |
| 1 | 4.116810000  | -2.146568000 | 0.697493000  | 6  | 1.073289000  | -2.443748000 | -0.258923000 |
| 1 | 4.294842000  | 1.891619000  | -0.758210000 | 6  | 2.156220000  | -2.260240000 | 0.571582000  |
| 1 | 5.455059000  | -0.188384000 | -0.046369000 | 6  | 1.224361000  | -3.230612000 | -1.392100000 |

### L1-CuH

|   |              |             |              |   |             |              |              |
|---|--------------|-------------|--------------|---|-------------|--------------|--------------|
| 6 | -2.193546000 | 0.866419000 | -5.226714000 | 6 | 2.399139000 | -3.913034000 | -1.640891000 |
| 1 | -1.927663000 | 0.062388000 | -5.936674000 | 1 | 0.417711000 | -3.288255000 | -2.088056000 |
|   |              |             |              | 6 | 3.432526000 | -3.811255000 | -0.687969000 |

|    |              |              |              |   |             |              |              |
|----|--------------|--------------|--------------|---|-------------|--------------|--------------|
| 6  | 1.502592000  | 2.971899000  | 0.921051000  | 1 | 4.019973000 | 5.435443000  | 5.004965000  |
| 6  | 1.842531000  | 4.116108000  | 0.204398000  | 1 | 4.786405000 | 4.008693000  | 5.657540000  |
| 6  | 1.945911000  | 2.847480000  | 2.217092000  | 6 | 2.071236000 | 3.507770000  | 5.289861000  |
| 6  | 2.545007000  | 5.150307000  | 0.783332000  | 1 | 1.303606000 | 2.800872000  | 4.998657000  |
| 1  | 1.551506000  | 4.183486000  | -0.819333000 | 1 | 2.446021000 | 3.221091000  | 6.267429000  |
| 6  | 2.682795000  | 3.849290000  | 2.853892000  | 1 | 1.617380000 | 4.487382000  | 5.374920000  |
| 1  | 1.688739000  | 1.957707000  | 2.750620000  | 6 | 3.849176000 | 2.089947000  | 4.225527000  |
| 6  | 2.880017000  | 5.031495000  | 2.150408000  | 1 | 3.114004000 | 1.324999000  | 4.020778000  |
| 6  | -1.073289000 | 2.443748000  | -0.258923000 | 1 | 4.627597000 | 2.038226000  | 3.472756000  |
| 6  | -2.156220000 | 2.260240000  | 0.571582000  | 1 | 4.289338000 | 1.869505000  | 5.191707000  |
| 6  | -1.224361000 | 3.230612000  | -1.392100000 | 6 | 2.677930000 | 6.151728000  | -1.565251000 |
| 6  | -3.373503000 | 2.904252000  | 0.365701000  | 1 | 3.095365000 | 5.235403000  | -1.966009000 |
| 1  | -2.043693000 | 1.597581000  | 1.403266000  | 1 | 1.604744000 | 6.150964000  | -1.723099000 |
| 6  | -2.399139000 | 3.913034000  | -1.640891000 | 1 | 3.095168000 | 6.980516000  | -2.125595000 |
| 1  | -0.417711000 | 3.288255000  | -2.088056000 | 6 | 4.581533000 | 6.410905000  | 0.024033000  |
| 6  | -3.432526000 | 3.811255000  | -0.687969000 | 1 | 4.949618000 | 7.236901000  | -0.576895000 |
| 8  | 1.143136000  | -1.027190000 | -4.290680000 | 1 | 4.884559000 | 6.556829000  | 1.048980000  |
| 8  | -1.143136000 | 1.027190000  | -4.290680000 | 1 | 5.022876000 | 5.493300000  | -0.349881000 |
| 8  | 3.349052000  | -0.488412000 | -4.499946000 | 6 | 2.431639000 | 7.688723000  | 0.369837000  |
| 8  | -3.349052000 | 0.488412000  | -4.499946000 | 1 | 1.349663000 | 7.625833000  | 0.417725000  |
| 6  | -2.605976000 | 4.657925000  | -2.979523000 | 1 | 2.818626000 | 7.985108000  | 1.329027000  |
| 6  | -4.539601000 | 2.493607000  | 1.299692000  | 1 | 2.695407000 | 8.456004000  | -0.350801000 |
| 6  | 3.038197000  | 6.339134000  | -0.073202000 | 6 | 2.832569000 | -6.174446000 | -2.796353000 |
| 6  | 3.228964000  | 3.515137000  | 4.265203000  | 1 | 2.040458000 | -6.611984000 | -2.197483000 |
| 6  | -3.038197000 | -6.339134000 | -0.073202000 | 1 | 2.827762000 | -6.657541000 | -3.768086000 |
| 6  | -3.228964000 | -3.515137000 | 4.265203000  | 1 | 3.784221000 | -6.366588000 | -2.332379000 |
| 6  | 4.539601000  | -2.493607000 | 1.299692000  | 6 | 1.382911000 | -4.492455000 | -3.910634000 |
| 6  | 2.605976000  | -4.657925000 | -2.979523000 | 1 | 0.501318000 | -4.973644000 | -3.499401000 |
| 29 | 0.000000000  | 0.000000000  | 1.651752000  | 1 | 1.161068000 | -3.450839000 | -4.097090000 |
| 8  | 3.428419000  | 6.150552000  | 2.777067000  | 1 | 1.606633000 | -4.972402000 | -4.857284000 |
| 8  | 4.539601000  | -4.647158000 | -0.836573000 | 6 | 3.831841000 | -4.037706000 | -3.695080000 |
| 6  | 4.541649000  | -5.818424000 | 0.033114000  | 1 | 4.717855000 | -4.171155000 | -3.093464000 |
| 6  | 2.500014000  | 6.921287000  | 3.597356000  | 1 | 3.981479000 | -4.526551000 | -4.653742000 |
| 1  | 2.176452000  | 6.347102000  | 4.449017000  | 1 | 3.682720000 | -2.978444000 | -3.864979000 |
| 1  | 3.048825000  | 7.790103000  | 3.923845000  | 6 | 5.943331000 | -2.964876000 | 0.850349000  |
| 1  | 1.636950000  | 7.218323000  | 3.021080000  | 1 | 6.087530000 | -4.025100000 | 0.967251000  |
| 6  | 4.362311000  | 4.445577000  | 4.760116000  | 1 | 6.128434000 | -2.709130000 | -0.183228000 |
| 1  | 5.143520000  | 4.532797000  | 4.017000000  | 1 | 6.677417000 | -2.461294000 | 1.469909000  |

|   |              |              |              |                            |              |              |              |
|---|--------------|--------------|--------------|----------------------------|--------------|--------------|--------------|
| 6 | 4.265087000  | -2.996603000 | 2.735263000  | 1                          | -3.323567000 | 2.612612000  | 3.109465000  |
| 1 | 3.323567000  | -2.612612000 | 3.109465000  | 6                          | -5.943331000 | 2.964876000  | 0.850349000  |
| 1 | 4.226030000  | -4.079035000 | 2.765609000  | 1                          | -6.677417000 | 2.461294000  | 1.469909000  |
| 1 | 5.056252000  | -2.665494000 | 3.400354000  | 1                          | -6.087530000 | 4.025100000  | 0.967251000  |
| 6 | 4.611360000  | -0.941189000 | 1.320447000  | 1                          | -6.128434000 | 2.709130000  | -0.183228000 |
| 1 | 4.769648000  | -0.562638000 | 0.317913000  | 6                          | -2.832569000 | 6.174446000  | -2.796353000 |
| 1 | 3.714303000  | -0.488255000 | 1.717755000  | 1                          | -2.040458000 | 6.611984000  | -2.197483000 |
| 1 | 5.441014000  | -0.630789000 | 1.946025000  | 1                          | -2.827762000 | 6.657541000  | -3.768086000 |
| 1 | 3.666151000  | -6.424827000 | -0.142166000 | 1                          | -3.784221000 | 6.366588000  | -2.332379000 |
| 1 | 4.565541000  | -5.523832000 | 1.069698000  | 6                          | -1.382911000 | 4.492455000  | -3.910634000 |
| 1 | 5.434314000  | -6.369037000 | -0.216895000 | 1                          | -0.501318000 | 4.973644000  | -3.499401000 |
| 6 | -2.431639000 | -7.688723000 | 0.369837000  | 1                          | -1.161068000 | 3.450839000  | -4.097090000 |
| 1 | -2.818626000 | -7.985108000 | 1.329027000  | 1                          | -1.606633000 | 4.972402000  | -4.857284000 |
| 1 | -2.695407000 | -8.456004000 | -0.350801000 | 6                          | -3.831841000 | 4.037706000  | -3.695080000 |
| 1 | -1.349663000 | -7.625833000 | 0.417725000  | 1                          | -4.717855000 | 4.171155000  | -3.093464000 |
| 6 | -2.677930000 | -6.151728000 | -1.565251000 | 1                          | -3.981479000 | 4.526551000  | -4.653742000 |
| 1 | -3.095365000 | -5.235403000 | -1.966009000 | 1                          | -3.682720000 | 2.978444000  | -3.864979000 |
| 1 | -1.604744000 | -6.150964000 | -1.723099000 | 8                          | -3.428419000 | -6.150552000 | 2.777067000  |
| 1 | -3.095168000 | -6.980516000 | -2.125595000 | 8                          | -4.539601000 | 4.647158000  | -0.836573000 |
| 6 | -4.581533000 | -6.410905000 | 0.024033000  | 6                          | -2.500014000 | -6.921287000 | 3.597356000  |
| 1 | -4.949618000 | -7.236901000 | -0.576895000 | 1                          | -2.176452000 | -6.347102000 | 4.449017000  |
| 1 | -4.884559000 | -6.556829000 | 1.048980000  | 1                          | -3.048825000 | -7.790103000 | 3.923845000  |
| 1 | -5.022876000 | -5.493300000 | -0.349881000 | 1                          | -1.636950000 | -7.218323000 | 3.021080000  |
| 6 | -2.071236000 | -3.507770000 | 5.289861000  | 6                          | -4.541649000 | 5.818424000  | 0.033114000  |
| 1 | -1.617380000 | -4.487382000 | 5.374920000  | 1                          | -3.666151000 | 6.424827000  | -0.142166000 |
| 1 | -1.303606000 | -2.800872000 | 4.998657000  | 1                          | -5.434314000 | 6.369037000  | -0.216895000 |
| 1 | -2.446021000 | -3.221091000 | 6.267429000  | 1                          | -4.565541000 | 5.523832000  | 1.069698000  |
| 6 | -3.849176000 | -2.089947000 | 4.225527000  | 6                          | 2.193546000  | -0.866419000 | -5.226714000 |
| 1 | -4.289338000 | -1.869505000 | 5.191707000  | 1                          | 2.376664000  | -1.812431000 | -5.740144000 |
| 1 | -3.114004000 | -1.324999000 | 4.020778000  | 1                          | 1.927663000  | -0.062388000 | -5.936674000 |
| 1 | -4.627597000 | -2.038226000 | 3.472756000  | 1                          | 0.000000000  | 0.000000000  | 3.220645000  |
| 6 | -4.611360000 | 0.941189000  | 1.320447000  | 6                          | -4.362311000 | -4.445577000 | 4.760116000  |
| 1 | -4.769648000 | 0.562638000  | 0.317913000  | 1                          | -5.143520000 | -4.532797000 | 4.017000000  |
| 1 | -3.714303000 | 0.488255000  | 1.717755000  | 1                          | -4.019973000 | -5.435443000 | 5.004965000  |
| 1 | -5.441014000 | 0.630789000  | 1.946025000  | 1                          | -4.786405000 | -4.008693000 | 5.657540000  |
| 6 | -4.265087000 | 2.996603000  | 2.735263000  |                            |              |              |              |
| 1 | -4.226030000 | 4.079035000  | 2.765609000  | <b>L1-TS1<sub>si</sub></b> |              |              |              |
| 1 | -5.056252000 | 2.665494000  | 3.400354000  | 6                          | 1.320359000  | -2.116230000 | 5.494302000  |



|    |              |              |              |    |              |              |              |
|----|--------------|--------------|--------------|----|--------------|--------------|--------------|
| 1  | 2.340356000  | -2.536527000 | 5.580259000  | 6  | -2.210659000 | -2.048444000 | -2.404036000 |
| 1  | 0.631939000  | -2.571324000 | 6.208289000  | 6  | -4.675170000 | -2.649441000 | -1.277753000 |
| 6  | 0.649951000  | -4.763582000 | 0.052879000  | 1  | -3.782137000 | -2.014946000 | 0.541129000  |
| 6  | 1.644172000  | -4.575914000 | 0.980777000  | 6  | -3.199128000 | -2.582975000 | -3.225367000 |
| 6  | 1.852978000  | -3.337204000 | 1.570484000  | 1  | -1.256030000 | -1.804373000 | -2.818728000 |
| 6  | 1.083902000  | -2.218726000 | 1.306612000  | 6  | -4.461716000 | -2.770800000 | -2.660465000 |
| 6  | 0.022134000  | -2.406863000 | 0.376744000  | 6  | -1.895868000 | -0.525000000 | 1.469730000  |
| 6  | -0.155379000 | -3.653138000 | -0.227883000 | 6  | -2.230021000 | 0.798403000  | 1.657462000  |
| 6  | 1.361715000  | -1.019684000 | 2.142113000  | 6  | -2.194564000 | -1.442256000 | 2.470854000  |
| 6  | 1.260757000  | -1.195697000 | 3.509109000  | 6  | -2.916983000 | 1.236263000  | 2.790777000  |
| 6  | 1.578001000  | -0.219981000 | 4.442832000  | 1  | -1.948074000 | 1.503711000  | 0.906203000  |
| 6  | 2.030825000  | 1.015617000  | 4.052379000  | 6  | -2.897284000 | -1.074197000 | 3.600996000  |
| 6  | 2.177353000  | 1.215670000  | 2.673600000  | 1  | -1.855969000 | -2.447824000 | 2.359362000  |
| 6  | 1.860288000  | 0.245154000  | 1.720995000  | 6  | -3.329506000 | 0.262488000  | 3.697678000  |
| 15 | -1.072346000 | -1.000691000 | -0.092492000 | 8  | 2.909820000  | -3.440687000 | 2.442832000  |
| 15 | 2.090464000  | 0.565736000  | -0.078713000 | 8  | 0.849361000  | -2.323011000 | 4.176237000  |
| 1  | 0.476125000  | -5.729080000 | -0.414299000 | 8  | 2.545001000  | -5.473923000 | 1.482221000  |
| 1  | -0.972179000 | -3.779278000 | -0.931063000 | 8  | 1.369419000  | -0.716398000 | 5.701075000  |
| 1  | 2.292748000  | 1.785573000  | 4.772886000  | 6  | -3.075612000 | -2.067158000 | 4.772480000  |
| 1  | 2.582727000  | 2.163953000  | 2.337443000  | 6  | -3.109510000 | 2.764729000  | 2.962123000  |
| 6  | 2.953358000  | 2.194061000  | -0.153292000 | 6  | -5.980025000 | -3.139599000 | -0.609427000 |
| 6  | 4.273381000  | 2.296792000  | -0.567947000 | 6  | -2.780158000 | -2.954411000 | -4.671586000 |
| 6  | 2.275327000  | 3.354896000  | 0.177389000  | 6  | 6.391563000  | 3.594557000  | -1.107668000 |
| 6  | 4.889284000  | 3.522592000  | -0.750948000 | 6  | 2.094791000  | 5.810238000  | 0.694581000  |
| 1  | 4.816403000  | 1.402185000  | -0.756885000 | 6  | 4.226944000  | -2.668379000 | -3.626793000 |
| 6  | 2.866456000  | 4.612730000  | 0.079572000  | 6  | 6.497931000  | -2.309388000 | 0.991395000  |
| 1  | 1.269110000  | 3.275541000  | 0.534717000  | 29 | 0.185314000  | 0.407141000  | -1.241253000 |
| 6  | 4.133939000  | 4.676834000  | -0.502372000 | 8  | -5.555931000 | -3.092234000 | -3.463157000 |
| 6  | 3.421076000  | -0.613710000 | -0.532667000 | 8  | 6.668078000  | -2.844591000 | -1.838736000 |
| 6  | 3.414331000  | -1.165736000 | -1.792842000 | 6  | 7.581722000  | -2.006545000 | -2.605875000 |
| 6  | 4.437743000  | -0.967192000 | 0.348544000  | 6  | -6.153093000 | -1.970670000 | -4.180633000 |
| 6  | 4.437806000  | -1.999641000 | -2.245095000 | 1  | -5.464740000 | -1.570639000 | -4.906228000 |
| 1  | 2.585421000  | -0.953103000 | -2.431610000 | 1  | -7.023355000 | -2.369203000 | -4.676765000 |
| 6  | 5.483133000  | -1.777137000 | -0.045435000 | 1  | -6.440100000 | -1.187504000 | -3.495487000 |
| 1  | 4.390675000  | -0.609642000 | 1.352099000  | 6  | -3.766419000 | -3.884469000 | -5.419153000 |
| 6  | 5.515720000  | -2.198844000 | -1.389618000 | 1  | -4.017998000 | -4.746983000 | -4.817525000 |
| 6  | -2.418939000 | -1.803659000 | -1.060069000 | 1  | -4.680681000 | -3.391964000 | -5.699438000 |
| 6  | -3.639724000 | -2.153648000 | -0.504330000 | 1  | -3.280849000 | -4.225493000 | -6.326937000 |

|   |              |              |              |   |              |              |              |
|---|--------------|--------------|--------------|---|--------------|--------------|--------------|
| 6 | -2.548670000 | -1.672482000 | -5.503583000 | 1 | 5.316993000  | -1.169914000 | -4.779681000 |
| 1 | -1.798701000 | -1.041791000 | -5.041910000 | 1 | 4.127774000  | -2.069003000 | -5.710588000 |
| 1 | -2.206130000 | -1.934177000 | -6.499639000 | 6 | 2.799381000  | -3.283606000 | -3.646228000 |
| 1 | -3.460781000 | -1.096810000 | -5.598477000 | 1 | 2.691427000  | -4.002154000 | -2.842321000 |
| 6 | -1.442645000 | -3.743423000 | -4.602469000 | 1 | 2.024841000  | -2.537701000 | -3.539945000 |
| 1 | -0.632716000 | -3.153841000 | -4.197761000 | 1 | 2.644273000  | -3.793027000 | -4.591330000 |
| 1 | -1.562723000 | -4.632538000 | -3.993831000 | 1 | 7.892278000  | -1.150443000 | -2.025899000 |
| 1 | -1.158370000 | -4.049061000 | -5.603296000 | 1 | 7.114859000  | -1.667091000 | -3.516519000 |
| 6 | -5.895055000 | -3.053746000 | 0.932058000  | 1 | 8.430835000  | -2.630069000 | -2.835480000 |
| 1 | -5.064155000 | -3.631980000 | 1.318757000  | 6 | 6.647676000  | 4.276643000  | -2.469696000 |
| 1 | -5.799787000 | -2.029520000 | 1.275140000  | 1 | 6.419778000  | 5.327078000  | -2.419742000 |
| 1 | -6.808847000 | -3.462621000 | 1.348190000  | 1 | 7.695137000  | 4.171951000  | -2.733193000 |
| 6 | -6.198445000 | -4.627359000 | -0.977013000 | 1 | 6.053738000  | 3.812075000  | -3.249680000 |
| 1 | -7.109019000 | -4.990776000 | -0.510528000 | 6 | 7.025816000  | 2.186596000  | -1.181862000 |
| 1 | -6.279731000 | -4.740582000 | -2.046594000 | 1 | 6.916913000  | 1.647382000  | -0.248657000 |
| 1 | -5.368444000 | -5.226135000 | -0.617886000 | 1 | 6.595256000  | 1.593922000  | -1.981573000 |
| 6 | -7.213331000 | -2.315498000 | -1.040175000 | 1 | 8.085540000  | 2.299794000  | -1.381265000 |
| 1 | -7.035936000 | -1.255172000 | -0.893249000 | 6 | 7.126808000  | 4.376912000  | 0.007361000  |
| 1 | -7.456224000 | -2.500713000 | -2.072056000 | 1 | 8.186726000  | 4.433329000  | -0.221093000 |
| 1 | -8.068212000 | -2.602979000 | -0.436741000 | 1 | 6.729352000  | 5.376811000  | 0.086294000  |
| 6 | 7.937706000  | -1.816555000 | 0.734953000  | 1 | 7.008818000  | 3.870752000  | 0.959307000  |
| 1 | 7.966772000  | -0.734266000 | 0.665779000  | 6 | 0.833444000  | 6.123325000  | -0.138672000 |
| 1 | 8.574882000  | -2.119765000 | 1.559526000  | 1 | 1.097057000  | 6.424573000  | -1.145181000 |
| 1 | 8.334402000  | -2.245385000 | -0.169453000 | 1 | 0.186014000  | 5.258948000  | -0.203423000 |
| 6 | 6.107645000  | -1.883467000 | 2.425494000  | 1 | 0.275556000  | 6.930982000  | 0.324205000  |
| 1 | 6.171415000  | -0.808571000 | 2.557721000  | 6 | 1.658335000  | 5.406482000  | 2.130036000  |
| 1 | 5.107333000  | -2.215456000 | 2.670890000  | 1 | 1.135227000  | 6.236274000  | 2.592206000  |
| 1 | 6.803815000  | -2.341372000 | 3.119873000  | 1 | 0.993839000  | 4.555550000  | 2.137060000  |
| 6 | 6.461184000  | -3.856640000 | 0.946665000  | 1 | 2.529446000  | 5.172983000  | 2.732122000  |
| 1 | 6.772742000  | -4.212693000 | -0.022441000 | 6 | -1.812385000 | 3.484482000  | 2.498594000  |
| 1 | 7.122856000  | -4.263340000 | 1.705826000  | 1 | -0.950760000 | 3.079196000  | 3.016741000  |
| 1 | 5.452750000  | -4.201658000 | 1.139048000  | 1 | -1.654414000 | 3.400093000  | 1.432606000  |
| 6 | 5.187056000  | -3.839371000 | -3.945674000 | 1 | -1.894057000 | 4.540265000  | 2.731441000  |
| 1 | 6.195612000  | -3.515720000 | -4.137444000 | 6 | -4.272798000 | 3.265032000  | 2.077409000  |
| 1 | 5.208681000  | -4.556128000 | -3.137077000 | 1 | -5.216069000 | 2.830220000  | 2.379078000  |
| 1 | 4.822323000  | -4.334958000 | -4.838846000 | 1 | -4.359517000 | 4.344267000  | 2.160329000  |
| 6 | 4.326810000  | -1.609077000 | -4.747837000 | 1 | -4.102104000 | 3.018906000  | 1.038304000  |
| 1 | 3.606979000  | -0.813497000 | -4.596272000 | 6 | -3.326827000 | 3.211513000  | 4.428479000  |



|    |              |              |              |    |              |              |              |
|----|--------------|--------------|--------------|----|--------------|--------------|--------------|
| 15 | -2.160747000 | -0.119521000 | 0.420239000  | 8  | -1.383148000 | 4.505186000  | -2.033110000 |
| 15 | 1.177401000  | 0.790085000  | -0.284197000 | 8  | -2.627458000 | 2.344596000  | -3.653434000 |
| 1  | -4.139220000 | 4.366131000  | 1.388091000  | 8  | -2.794830000 | 5.697398000  | -0.698988000 |
| 1  | -3.826999000 | 1.924276000  | 1.698638000  | 8  | -1.573368000 | 1.608798000  | -5.532469000 |
| 1  | 0.975868000  | 0.415166000  | -5.272328000 | 6  | -5.337573000 | -0.655517000 | -3.892519000 |
| 1  | 2.005922000  | 0.200423000  | -3.034041000 | 6  | -1.693661000 | -4.165126000 | -2.853765000 |
| 6  | 2.877493000  | 0.197478000  | -0.694269000 | 6  | -6.779086000 | -2.371229000 | 1.992957000  |
| 6  | 3.995546000  | 0.970240000  | -0.414767000 | 6  | -3.883458000 | 0.236341000  | 5.391413000  |
| 6  | 3.064422000  | -1.030825000 | -1.304123000 | 6  | 6.494477000  | 1.432929000  | -0.402651000 |
| 6  | 5.279977000  | 0.507981000  | -0.643308000 | 6  | 4.389000000  | -2.730113000 | -2.601430000 |
| 1  | 3.852288000  | 1.941243000  | -0.005904000 | 6  | 1.466098000  | 4.321896000  | 3.604780000  |
| 6  | 4.327433000  | -1.500718000 | -1.654837000 | 6  | 2.290142000  | 5.954175000  | -1.220930000 |
| 1  | 2.205825000  | -1.627209000 | -1.535104000 | 29 | -0.050408000 | -0.410369000 | 1.121165000  |
| 6  | 5.426988000  | -0.770796000 | -1.198898000 | 8  | -5.956272000 | -1.865629000 | 4.712061000  |
| 6  | 1.487871000  | 2.515611000  | 0.263330000  | 8  | 2.717232000  | 6.241623000  | 1.619239000  |
| 6  | 1.421509000  | 2.817150000  | 1.603182000  | 6  | 4.100335000  | 6.181275000  | 2.077306000  |
| 6  | 1.796883000  | 3.530515000  | -0.637239000 | 6  | -5.358728000 | -2.992438000 | 5.421168000  |
| 6  | 1.733560000  | 4.084492000  | 2.097352000  | 1  | -4.478366000 | -2.681461000 | 5.959019000  |
| 1  | 1.103789000  | 2.051026000  | 2.275105000  | 1  | -6.111619000 | -3.337686000 | 6.111381000  |
| 6  | 2.129775000  | 4.798577000  | -0.207421000 | 1  | -5.092941000 | -3.779393000 | 4.732002000  |
| 1  | 1.762315000  | 3.315013000  | -1.680871000 | 6  | -5.067165000 | 0.142053000  | 6.384775000  |
| 6  | 2.191318000  | 5.025391000  | 1.182349000  | 1  | -5.992729000 | 0.448884000  | 5.918105000  |
| 6  | -3.430303000 | -0.534874000 | 1.688828000  | 1  | -5.203545000 | -0.847266000 | 6.784800000  |
| 6  | -4.568010000 | -1.270176000 | 1.391474000  | 1  | -4.859516000 | 0.809271000  | 7.214139000  |
| 6  | -3.239738000 | -0.115092000 | 2.993234000  | 6  | -2.610364000 | -0.334758000 | 6.056154000  |
| 6  | -5.457510000 | -1.666140000 | 2.375744000  | 1  | -1.744273000 | -0.199071000 | 5.419817000  |
| 1  | -4.749677000 | -1.537975000 | 0.377755000  | 1  | -2.424156000 | 0.174776000  | 6.996180000  |
| 6  | -4.121434000 | -0.444936000 | 4.017979000  | 1  | -2.718440000 | -1.393024000 | 6.259761000  |
| 1  | -2.384466000 | 0.488277000  | 3.210877000  | 6  | -3.673035000 | 1.757060000  | 5.147472000  |
| 6  | -5.164721000 | -1.317343000 | 3.703157000  | 1  | -2.798612000 | 1.965622000  | 4.547830000  |
| 6  | -2.765931000 | -0.978343000 | -1.073923000 | 1  | -4.541575000 | 2.180656000  | 4.655594000  |
| 6  | -2.132673000 | -2.148342000 | -1.428809000 | 1  | -3.543143000 | 2.255811000  | 6.101486000  |
| 6  | -3.820253000 | -0.522718000 | -1.856354000 | 6  | -6.933122000 | -2.495741000 | 0.459399000  |
| 6  | -2.567510000 | -2.937552000 | -2.492731000 | 1  | -6.900784000 | -1.527710000 | -0.026273000 |
| 1  | -1.274511000 | -2.447263000 | -0.866864000 | 1  | -6.166953000 | -3.130597000 | 0.027977000  |
| 6  | -4.298821000 | -1.260972000 | -2.920991000 | 1  | -7.897521000 | -2.943781000 | 0.248192000  |
| 1  | -4.250217000 | 0.427056000  | -1.629091000 | 6  | -7.961961000 | -1.516041000 | 2.508507000  |
| 6  | -3.716027000 | -2.521381000 | -3.159702000 | 1  | -8.901654000 | -1.990744000 | 2.243031000  |

|   |              |              |              |   |              |              |              |
|---|--------------|--------------|--------------|---|--------------|--------------|--------------|
| 1 | -7.908996000 | -1.413430000 | 3.581116000  | 1 | 5.397314000  | 3.317956000  | -0.624829000 |
| 1 | -7.936523000 | -0.531084000 | 2.055155000  | 1 | 5.561562000  | 2.785947000  | 1.048301000  |
| 6 | -6.884255000 | -3.798308000 | 2.574409000  | 1 | 6.943166000  | 3.449191000  | 0.192751000  |
| 1 | -6.007850000 | -4.383671000 | 2.317021000  | 6 | 7.247588000  | 1.621039000  | -1.741763000 |
| 1 | -6.995971000 | -3.767521000 | 3.644226000  | 1 | 8.103512000  | 2.272831000  | -1.594500000 |
| 1 | -7.756597000 | -4.292833000 | 2.159556000  | 1 | 7.589331000  | 0.667723000  | -2.113562000 |
| 6 | 3.713553000  | 6.550427000  | -1.237858000 | 1 | 6.593414000  | 2.076474000  | -2.477404000 |
| 1 | 4.453795000  | 5.773085000  | -1.395132000 | 6 | 3.885636000  | -3.997934000 | -1.882719000 |
| 1 | 3.795489000  | 7.264358000  | -2.051145000 | 1 | 4.533979000  | -4.254127000 | -1.057287000 |
| 1 | 3.924075000  | 7.066846000  | -0.316996000 | 1 | 2.889735000  | -3.860292000 | -1.484344000 |
| 6 | 1.964368000  | 5.487922000  | -2.658518000 | 1 | 3.866839000  | -4.830709000 | -2.579786000 |
| 1 | 2.678206000  | 4.752469000  | -3.014100000 | 6 | 3.459131000  | -2.434524000 | -3.811058000 |
| 1 | 0.965830000  | 5.075355000  | -2.717263000 | 1 | 3.499366000  | -3.266402000 | -4.505636000 |
| 1 | 2.022052000  | 6.347211000  | -3.317994000 | 1 | 2.428774000  | -2.302933000 | -3.515603000 |
| 6 | 1.267966000  | 7.057273000  | -0.852816000 | 1 | 3.791390000  | -1.540755000 | -4.328283000 |
| 1 | 1.477597000  | 7.451699000  | 0.128948000  | 6 | -0.205974000 | -3.717870000 | -2.859840000 |
| 1 | 1.317669000  | 7.863588000  | -1.578819000 | 1 | -0.069626000 | -2.887680000 | -3.542690000 |
| 1 | 0.267621000  | 6.641873000  | -0.858058000 | 1 | 0.142302000  | -3.420412000 | -1.880416000 |
| 6 | 1.496437000  | 5.801428000  | 4.056876000  | 1 | 0.413628000  | -4.544485000 | -3.188562000 |
| 1 | 2.488644000  | 6.219171000  | 4.060646000  | 6 | -1.867128000 | -5.270400000 | -1.787207000 |
| 1 | 0.872048000  | 6.415304000  | 3.423583000  | 1 | -2.886798000 | -5.634402000 | -1.763259000 |
| 1 | 1.114019000  | 5.847311000  | 5.070862000  | 1 | -1.212660000 | -6.106844000 | -2.011061000 |
| 6 | 2.470876000  | 3.510582000  | 4.453973000  | 1 | -1.617796000 | -4.897408000 | -0.800584000 |
| 1 | 2.413316000  | 2.453988000  | 4.220868000  | 6 | -1.951725000 | -4.758966000 | -4.259713000 |
| 1 | 3.486662000  | 3.843308000  | 4.275059000  | 1 | -1.167832000 | -5.478862000 | -4.467970000 |
| 1 | 2.251976000  | 3.638440000  | 5.509355000  | 1 | -2.896440000 | -5.267725000 | -4.334987000 |
| 6 | 0.027729000  | 3.820538000  | 3.916509000  | 1 | -1.922414000 | -3.987395000 | -5.016658000 |
| 1 | -0.692722000 | 4.355322000  | 3.308454000  | 6 | -6.652525000 | -1.461974000 | -3.962295000 |
| 1 | -0.090992000 | 2.762494000  | 3.731494000  | 1 | -7.065189000 | -1.611123000 | -2.969929000 |
| 1 | -0.194885000 | 4.005137000  | 4.962165000  | 1 | -7.379277000 | -0.910487000 | -4.549815000 |
| 1 | 4.746532000  | 5.818012000  | 1.292560000  | 1 | -6.494976000 | -2.415495000 | -4.435084000 |
| 1 | 4.189948000  | 5.536056000  | 2.936492000  | 6 | -5.712271000 | 0.788441000  | -3.487382000 |
| 1 | 4.366818000  | 7.191579000  | 2.343375000  | 1 | -6.224007000 | 0.813900000  | -2.530754000 |
| 6 | 7.464896000  | 0.868971000  | 0.658359000  | 1 | -4.840527000 | 1.425639000  | -3.439893000 |
| 1 | 7.962389000  | -0.010687000 | 0.289585000  | 1 | -6.391090000 | 1.187126000  | -4.233630000 |
| 1 | 8.220499000  | 1.613329000  | 0.888380000  | 6 | -4.691164000 | -0.598299000 | -5.299373000 |
| 1 | 6.934456000  | 0.629309000  | 1.573971000  | 1 | -4.457215000 | -1.595117000 | -5.640984000 |
| 6 | 6.057127000  | 2.833423000  | 0.084665000  | 1 | -5.380619000 | -0.138441000 | -6.001775000 |

|   |              |              |              |    |              |              |              |
|---|--------------|--------------|--------------|----|--------------|--------------|--------------|
| 1 | -3.778033000 | -0.015350000 | -5.274951000 | 1  | 3.007327000  | -6.102796000 | 1.294123000  |
| 8 | 6.711736000  | -1.298008000 | -1.301180000 | 1  | 0.858504000  | -4.930115000 | 1.113236000  |
| 8 | -4.318921000 | -3.342717000 | -4.112134000 | 1  | 2.760661000  | -1.261706000 | 2.281201000  |
| 6 | 7.045479000  | -2.321906000 | -0.312034000 | 1  | -0.521639000 | -2.991944000 | 1.412661000  |
| 1 | 6.355633000  | -3.146410000 | -0.362508000 | 1  | 0.799551000  | -1.284589000 | 3.554772000  |
| 1 | 8.041996000  | -2.651512000 | -0.557213000 | 1  | -0.991215000 | -1.514212000 | 3.253877000  |
| 1 | 7.023230000  | -1.908129000 | 0.683867000  | 1  | -0.132994000 | 0.298466000  | 2.538917000  |
| 6 | -5.173984000 | -4.393126000 | -3.571560000 | 6  | 1.970826000  | 2.547431000  | -0.602502000 |
| 1 | -5.937549000 | -3.973597000 | -2.933953000 | 8  | 1.987961000  | 2.808867000  | 0.600236000  |
| 1 | -5.623721000 | -4.874931000 | -4.424819000 | 8  | 1.783446000  | 1.375393000  | -1.113640000 |
| 1 | -4.593397000 | -5.105707000 | -3.008852000 | 6  | 2.112970000  | 3.640737000  | -1.637479000 |
| 6 | -2.239635000 | 5.631537000  | -1.999722000 | 1  | 2.783192000  | 3.328505000  | -2.445237000 |
| 1 | -1.666592000 | 6.537751000  | -2.203785000 | 1  | 2.477052000  | 4.562585000  | -1.175494000 |
| 1 | -3.051128000 | 5.486795000  | -2.737752000 | 1  | 1.128269000  | 3.830937000  | -2.086655000 |
| 6 | 5.777651000  | -3.020871000 | -3.222101000 | 6  | -2.106342000 | 3.554799000  | -0.174617000 |
| 1 | 6.206959000  | -2.132296000 | -3.662146000 | 6  | -3.143060000 | 2.878402000  | -0.806768000 |
| 1 | 6.478862000  | -3.420066000 | -2.510212000 | 6  | -3.217836000 | 1.497105000  | -0.699099000 |
| 1 | 5.640503000  | -3.762755000 | -4.001566000 | 6  | -2.271552000 | 0.764091000  | 0.027211000  |
| 6 | 6.368488000  | -4.658071000 | 2.979108000  | 6  | -1.252272000 | 1.455512000  | 0.714923000  |
| 6 | 7.595862000  | -5.298534000 | 3.087995000  | 6  | -1.178898000 | 2.848823000  | 0.579898000  |
| 6 | 7.909814000  | -6.363949000 | 2.249498000  | 6  | -2.453212000 | -0.716095000 | 0.040901000  |
| 6 | 6.979877000  | -6.779649000 | 1.301897000  | 6  | -3.569989000 | -1.218399000 | 0.713248000  |
| 6 | 5.754648000  | -6.133983000 | 1.189801000  | 6  | -3.816566000 | -2.583083000 | 0.792719000  |
| 6 | 5.421909000  | -5.058679000 | 2.025445000  | 6  | -2.944360000 | -3.471403000 | 0.177087000  |
| 6 | 4.126918000  | -4.363731000 | 1.905122000  | 6  | -1.851164000 | -2.985869000 | -0.531081000 |
| 6 | 2.966797000  | -5.032002000 | 1.496466000  | 6  | -1.593618000 | -1.614305000 | -0.626324000 |
| 6 | 1.752355000  | -4.370447000 | 1.394093000  | 15 | 0.092317000  | 0.636046000  | 1.660939000  |
| 6 | 1.625606000  | -3.009679000 | 1.713386000  | 15 | -0.087938000 | -1.017810000 | -1.482336000 |
| 6 | 4.010831000  | -2.994334000 | 2.183324000  | 1  | -2.018782000 | 4.636331000  | -0.261914000 |
| 6 | 2.799830000  | -2.334015000 | 2.085402000  | 1  | -0.357619000 | 3.387152000  | 1.049340000  |
| 6 | 0.310204000  | -2.374645000 | 1.758863000  | 1  | -3.116965000 | -4.544460000 | 0.236745000  |
| 6 | 0.010471000  | -1.487445000 | 2.830214000  | 1  | -1.188439000 | -3.697068000 | -1.020252000 |
| 1 | 8.870501000  | -6.868584000 | 2.336372000  | 29 | 1.567002000  | -0.129728000 | 0.014934000  |
| 1 | 8.308251000  | -4.970998000 | 3.844073000  | 6  | -0.687773000 | -0.722402000 | 2.622496000  |
| 1 | 6.120693000  | -3.850420000 | 3.667210000  | 1  | -1.607203000 | -0.396774000 | 3.126072000  |
| 1 | 5.047448000  | -6.453733000 | 0.424907000  | 1  | -0.898461000 | -1.596812000 | 2.000846000  |
| 1 | 7.213007000  | -7.609423000 | 0.635930000  | 1  | 0.046240000  | -1.028048000 | 3.378661000  |
| 1 | 4.899894000  | -2.424794000 | 2.454252000  | 6  | 0.492129000  | 1.800832000  | 3.014759000  |

|   |              |              |              |    |              |              |              |
|---|--------------|--------------|--------------|----|--------------|--------------|--------------|
| 1 | -0.411559000 | 2.145601000  | 3.533584000  | 6  | 1.832781000  | 0.518840000  | 1.727177000  |
| 1 | 1.127819000  | 1.261980000  | 3.727915000  | 15 | -1.029340000 | -1.034897000 | 0.095778000  |
| 1 | 1.065973000  | 2.641106000  | 2.617858000  | 15 | 1.996895000  | 0.581630000  | -0.095685000 |
| 6 | 0.524858000  | -2.473885000 | -2.410443000 | 1  | 0.505782000  | -5.747208000 | 0.677679000  |
| 1 | 1.351259000  | -2.124416000 | -3.041809000 | 1  | -0.961734000 | -3.936668000 | -0.156007000 |
| 1 | 0.933789000  | -3.212280000 | -1.710424000 | 1  | 2.057838000  | 2.650226000  | 4.425522000  |
| 1 | -0.236241000 | -2.945175000 | -3.046065000 | 1  | 2.409418000  | 2.568119000  | 1.963559000  |
| 6 | -0.667115000 | 0.088332000  | -2.823733000 | 6  | 2.985099000  | 2.098846000  | -0.383085000 |
| 1 | -1.470832000 | -0.357695000 | -3.422847000 | 6  | 4.313426000  | 2.214139000  | 0.017319000  |
| 1 | -1.002872000 | 1.043184000  | -2.403981000 | 6  | 2.393146000  | 3.168233000  | -1.016586000 |
| 1 | 0.200068000  | 0.298832000  | -3.461248000 | 6  | 5.069581000  | 3.326314000  | -0.281556000 |
| 1 | -4.682963000 | -2.949463000 | 1.340225000  | 1  | 4.754336000  | 1.410938000  | 0.560310000  |
| 1 | -4.237725000 | -0.511691000 | 1.206580000  | 6  | 3.097992000  | 4.337669000  | -1.320427000 |
| 1 | -4.011280000 | 0.950884000  | -1.210036000 | 1  | 1.365360000  | 3.084682000  | -1.298211000 |
| 1 | -3.884348000 | 3.420916000  | -1.390754000 | 6  | 4.459999000  | 4.345503000  | -1.041523000 |
| 8 | 3.476224000  | -0.942290000 | -0.161576000 | 6  | 3.146912000  | -0.765739000 | -0.538658000 |
| 6 | 3.034569000  | -1.940069000 | 0.459984000  | 6  | 2.963600000  | -1.365550000 | -1.765103000 |
| 8 | 1.819107000  | -1.949273000 | 0.852354000  | 6  | 4.184700000  | -1.208509000 | 0.272791000  |
| 6 | 3.897032000  | -3.130758000 | 0.745101000  | 6  | 3.828471000  | -2.344050000 | -2.252873000 |
| 1 | 3.917983000  | -3.323017000 | 1.823785000  | 1  | 2.123784000  | -1.063395000 | -2.354522000 |
| 1 | 3.465667000  | -4.020193000 | 0.270131000  | 6  | 5.098435000  | -2.144467000 | -0.170867000 |
| 1 | 4.913578000  | -2.972685000 | 0.376135000  | 1  | 4.259660000  | -0.823146000 | 1.264766000  |

### L1-(S)-IM1

|   |              |              |             |   |              |              |              |
|---|--------------|--------------|-------------|---|--------------|--------------|--------------|
| 6 | 1.228892000  | -1.086894000 | 5.872148000 | 6 | -2.412284000 | -1.980793000 | -0.668698000 |
| 1 | 2.252336000  | -1.449200000 | 6.084230000 | 6 | -3.689943000 | -1.970539000 | -0.132242000 |
| 1 | 0.518065000  | -1.413032000 | 6.633372000 | 6 | -2.195846000 | -2.689625000 | -1.837575000 |
| 6 | 0.671392000  | -4.714513000 | 0.971854000 | 6 | -4.760901000 | -2.559374000 | -0.782785000 |
| 6 | 1.663531000  | -4.358938000 | 1.850109000 | 1 | -3.847293000 | -1.475129000 | 0.795789000  |
| 6 | 1.844287000  | -3.036876000 | 2.227655000 | 6 | -3.220060000 | -3.359860000 | -2.502256000 |
| 6 | 1.083369000  | -1.984213000 | 1.756968000 | 1 | -1.203143000 | -2.729360000 | -2.236849000 |
| 6 | 0.036008000  | -2.335489000 | 0.855727000 | 6 | -4.517441000 | -3.174692000 | -2.018296000 |
| 6 | -0.139603000 | -3.675281000 | 0.499906000 | 6 | -1.808640000 | -0.181505000 | 1.507210000  |
| 6 | 1.354893000  | -0.656859000 | 2.368969000 | 6 | -2.009892000 | 1.179245000  | 1.414537000  |
| 6 | 1.226673000  | -0.575035000 | 3.742365000 | 6 | -2.181772000 | -0.835519000 | 2.672739000  |
| 6 | 1.474109000  | 0.577181000  | 4.475086000 | 6 | -2.623934000 | 1.911790000  | 2.428411000  |
| 6 | 1.873268000  | 1.739436000  | 3.862654000 | 1 | -1.680491000 | 1.683537000  | 0.533152000  |
| 6 | 2.055464000  | 1.678380000  | 2.475683000 | 6 | -2.820753000 | -0.171268000 | 3.702054000  |
|   |              |              |             | 1 | -1.954151000 | -1.873351000 | 2.770144000  |

|    |              |              |              |   |              |              |              |
|----|--------------|--------------|--------------|---|--------------|--------------|--------------|
| 6  | -3.108789000 | 1.196245000  | 3.525952000  | 1 | -7.534136000 | -4.166971000 | 0.524104000  |
| 8  | 2.892622000  | -2.972709000 | 3.112398000  | 1 | -6.618696000 | -4.573727000 | -0.926831000 |
| 8  | 0.823848000  | -1.565463000 | 4.603447000  | 1 | -5.842338000 | -4.633586000 | 0.655104000  |
| 8  | 2.593473000  | -5.139875000 | 2.481047000  | 6 | -7.232133000 | -1.858829000 | -0.901025000 |
| 8  | 1.236621000  | 0.327131000  | 5.799628000  | 1 | -6.914070000 | -0.843284000 | -1.109912000 |
| 6  | -3.111002000 | -0.899030000 | 5.034104000  | 1 | -7.453288000 | -2.363463000 | -1.825261000 |
| 6  | -2.677557000 | 3.453107000  | 2.281546000  | 1 | -8.144509000 | -1.814052000 | -0.315240000 |
| 6  | -6.148714000 | -2.619023000 | -0.105083000 | 6 | 7.609596000  | -2.487653000 | 0.305485000  |
| 6  | -2.819494000 | -4.304650000 | -3.666995000 | 1 | 7.776920000  | -1.437039000 | 0.091090000  |
| 6  | 6.495445000  | 3.484507000  | 0.293861000  | 1 | 8.300576000  | -2.785597000 | 1.087193000  |
| 6  | 2.280996000  | 5.522087000  | -1.896847000 | 1 | 7.822665000  | -3.074012000 | -0.570657000 |
| 6  | 3.413215000  | -3.050866000 | -3.567537000 | 6 | 6.054591000  | -2.096308000 | 2.199397000  |
| 6  | 6.162140000  | -2.723134000 | 0.790589000  | 1 | 6.279537000  | -1.034859000 | 2.180219000  |
| 29 | 0.092228000  | 0.380486000  | -1.184830000 | 1 | 5.074121000  | -2.243893000 | 2.627863000  |
| 8  | -5.614963000 | -3.608999000 | -2.759173000 | 1 | 6.786134000  | -2.574783000 | 2.841738000  |
| 8  | 5.963768000  | -3.445121000 | -1.993128000 | 6 | 5.905522000  | -4.244631000 | 0.925950000  |
| 6  | 6.888194000  | -2.777026000 | -2.902780000 | 1 | 6.013058000  | -4.725049000 | -0.034881000 |
| 6  | -5.992825000 | -2.738426000 | -3.869133000 | 1 | 6.623415000  | -4.677761000 | 1.616834000  |
| 1  | -5.212482000 | -2.706812000 | -4.611409000 | 1 | 4.906434000  | -4.432415000 | 1.300583000  |
| 1  | -6.887471000 | -3.169381000 | -4.288741000 | 6 | 4.180845000  | -4.356969000 | -3.885371000 |
| 1  | -6.188040000 | -1.736582000 | -3.518493000 | 1 | 5.199804000  | -4.183496000 | -4.184408000 |
| 6  | -3.925721000 | -5.286686000 | -4.125867000 | 1 | 4.185877000  | -5.023168000 | -3.034356000 |
| 1  | -4.357599000 | -5.810463000 | -3.284857000 | 1 | 3.673600000  | -4.848449000 | -4.708410000 |
| 1  | -4.720291000 | -4.802787000 | -4.666000000 | 6 | 3.544589000  | -2.077491000 | -4.760473000 |
| 1  | -3.468396000 | -6.013032000 | -4.788866000 | 1 | 2.950890000  | -1.185487000 | -4.603925000 |
| 6  | -2.328619000 | -3.491724000 | -4.884928000 | 1 | 4.575400000  | -1.777035000 | -4.903993000 |
| 1  | -1.490314000 | -2.859757000 | -4.624102000 | 1 | 3.200781000  | -2.558945000 | -5.670310000 |
| 1  | -2.013331000 | -4.166322000 | -5.674577000 | 6 | 1.924823000  | -3.473767000 | -3.427785000 |
| 1  | -3.116390000 | -2.858794000 | -5.273959000 | 1 | 1.802616000  | -4.120894000 | -2.566887000 |
| 6  | -1.657190000 | -5.207324000 | -3.168169000 | 1 | 1.263845000  | -2.626176000 | -3.317119000 |
| 1  | -0.777785000 | -4.640121000 | -2.901621000 | 1 | 1.621229000  | -4.014001000 | -4.317438000 |
| 1  | -1.975285000 | -5.782904000 | -2.305890000 | 1 | 7.365423000  | -1.940822000 | -2.415004000 |
| 1  | -1.376917000 | -5.897564000 | -3.956082000 | 1 | 6.372078000  | -2.426764000 | -3.781706000 |
| 6  | -6.114746000 | -2.004946000 | 1.313010000  | 1 | 7.621347000  | -3.519363000 | -3.174490000 |
| 1  | -5.396033000 | -2.507497000 | 1.949223000  | 6 | 7.579719000  | 3.548688000  | -0.804249000 |
| 1  | -5.881577000 | -0.946096000 | 1.288665000  | 1 | 7.506641000  | 4.467027000  | -1.360238000 |
| 1  | -7.095471000 | -2.121837000 | 1.760020000  | 1 | 8.561368000  | 3.511967000  | -0.343244000 |
| 6  | -6.563251000 | -4.103209000 | 0.042379000  | 1 | 7.490984000  | 2.705471000  | -1.481057000 |



|   |              |              |              |   |              |              |              |
|---|--------------|--------------|--------------|---|--------------|--------------|--------------|
| 6 | 6.865111000  | 2.306756000  | 1.224811000  | 1 | -2.581264000 | -0.655379000 | 7.124251000  |
| 1 | 6.164663000  | 2.211828000  | 2.046504000  | 1 | -1.370015000 | -0.026268000 | 6.006937000  |
| 1 | 6.909320000  | 1.366385000  | 0.686178000  | 8 | 5.274496000  | 5.376989000  | -1.506644000 |
| 1 | 7.846426000  | 2.496151000  | 1.644379000  | 8 | -3.850898000 | 1.819272000  | 4.527182000  |
| 6 | 6.544227000  | 4.778121000  | 1.142719000  | 6 | 5.667847000  | 5.269870000  | -2.908077000 |
| 1 | 7.537311000  | 4.904259000  | 1.562914000  | 1 | 4.807968000  | 5.346401000  | -3.552320000 |
| 1 | 6.307961000  | 5.635219000  | 0.531705000  | 1 | 6.340148000  | 6.093361000  | -3.087660000 |
| 1 | 5.833259000  | 4.716583000  | 1.959567000  | 1 | 6.167066000  | 4.331053000  | -3.093352000 |
| 6 | 1.833662000  | 5.204817000  | -3.341926000 | 6 | -5.254083000 | 2.135070000  | 4.294391000  |
| 1 | 2.688311000  | 5.102349000  | -3.999263000 | 1 | -5.652224000 | 1.557213000  | 3.472187000  |
| 1 | 1.266227000  | 4.283851000  | -3.384184000 | 1 | -5.784126000 | 1.894865000  | 5.201640000  |
| 1 | 1.209136000  | 6.007749000  | -3.720445000 | 1 | -5.357379000 | 3.187065000  | 4.090940000  |
| 6 | 1.017857000  | 5.710001000  | -1.012311000 | 6 | 3.056774000  | -4.313606000 | 3.533663000  |
| 1 | 0.447519000  | 6.555498000  | -1.380765000 | 1 | 4.113257000  | -4.514483000 | 3.721337000  |
| 1 | 0.369701000  | 4.847349000  | -1.025072000 | 1 | 2.439475000  | -4.485425000 | 4.435078000  |
| 1 | 1.304962000  | 5.909987000  | 0.013682000  | 6 | 3.001236000  | 6.892493000  | -1.871962000 |
| 6 | -1.503680000 | 3.947232000  | 1.394067000  | 1 | 3.409151000  | 7.100485000  | -0.892618000 |
| 1 | -0.556895000 | 3.558485000  | 1.751295000  | 1 | 3.797886000  | 6.964184000  | -2.591295000 |
| 1 | -1.630342000 | 3.673874000  | 0.356034000  | 1 | 2.269330000  | 7.656150000  | -2.111247000 |
| 1 | -1.470855000 | 5.029988000  | 1.440500000  | 6 | -6.078706000 | 4.693883000  | -2.583597000 |
| 6 | -3.983199000 | 3.887660000  | 1.577425000  | 6 | -7.342477000 | 5.230426000  | -2.374122000 |
| 1 | -4.862136000 | 3.616076000  | 2.140967000  | 6 | -8.306130000 | 4.509655000  | -1.675156000 |
| 1 | -3.987423000 | 4.965574000  | 1.447351000  | 6 | -7.987192000 | 3.246922000  | -1.185317000 |
| 1 | -4.051718000 | 3.429614000  | 0.599540000  | 6 | -6.720669000 | 2.714970000  | -1.389716000 |
| 6 | -2.500803000 | 4.174520000  | 3.639300000  | 6 | -5.739444000 | 3.424764000  | -2.095393000 |
| 1 | -2.506563000 | 5.245748000  | 3.469513000  | 6 | -4.399173000 | 2.853170000  | -2.313979000 |
| 1 | -3.267603000 | 3.924139000  | 4.347796000  | 6 | -3.252761000 | 3.655453000  | -2.349514000 |
| 1 | -1.545205000 | 3.903242000  | 4.075541000  | 6 | -1.994598000 | 3.106080000  | -2.549648000 |
| 6 | -4.625239000 | -1.030975000 | 5.300808000  | 6 | -1.794930000 | 1.725468000  | -2.730520000 |
| 1 | -5.117125000 | -1.524848000 | 4.469881000  | 6 | -4.212661000 | 1.475307000  | -2.498838000 |
| 1 | -4.785401000 | -1.627140000 | 6.193586000  | 6 | -2.958636000 | 0.930802000  | -2.709518000 |
| 1 | -5.075914000 | -0.067652000 | 5.456841000  | 6 | -0.447218000 | 1.163266000  | -2.940907000 |
| 6 | -2.525545000 | -2.330598000 | 5.036241000  | 6 | -0.373568000 | 0.148445000  | -4.074687000 |
| 1 | -3.007941000 | -2.963367000 | 4.298650000  | 1 | -9.298044000 | 4.928786000  | -1.514325000 |
| 1 | -1.459673000 | -2.320759000 | 4.854788000  | 1 | -7.580822000 | 6.216377000  | -2.771322000 |
| 1 | -2.705925000 | -2.770227000 | 6.011355000  | 1 | -5.343706000 | 5.254048000  | -3.161261000 |
| 6 | -2.433047000 | -0.121927000 | 6.189582000  | 1 | -6.471813000 | 1.739082000  | -0.973138000 |
| 1 | -2.853798000 | 0.866200000  | 6.275202000  | 1 | -8.728747000 | 2.673768000  | -0.629797000 |

|   |              |              |              |   |              |              |              |
|---|--------------|--------------|--------------|---|--------------|--------------|--------------|
| 1 | -5.081649000 | 0.816289000  | -2.506104000 | 6 | -4.571161000 | -2.869948000 | -2.755159000 |
| 1 | -3.347405000 | 4.732157000  | -2.200142000 | 6 | -2.150349000 | -0.427346000 | 1.357670000  |
| 1 | -1.128672000 | 3.768008000  | -2.592309000 | 6 | -2.397010000 | 0.926084000  | 1.433951000  |
| 1 | -2.867527000 | -0.145768000 | -2.844268000 | 6 | -2.578635000 | -1.248660000 | 2.395022000  |
| 1 | 0.233755000  | 1.994303000  | -3.182597000 | 6 | -3.114154000 | 1.490211000  | 2.489684000  |
| 1 | -0.787189000 | 0.540996000  | -5.022546000 | 1 | -2.025156000 | 1.559878000  | 0.656455000  |
| 1 | -0.925024000 | -0.775082000 | -3.856635000 | 6 | -3.331425000 | -0.755168000 | 3.442168000  |
| 1 | 0.666855000  | -0.143308000 | -4.275166000 | 1 | -2.304702000 | -2.279964000 | 2.376039000  |

### L1-(R)-IM1

|    |              |              |              |    |              |              |              |
|----|--------------|--------------|--------------|----|--------------|--------------|--------------|
| 6  | 2.482558000  | -4.958526000 | 3.022850000  | 6  | 2.861503000  | 1.988573000  | 0.130376000  |
| 1  | 1.764380000  | -5.275467000 | 3.802322000  | 6  | 4.213518000  | 1.973436000  | -0.181252000 |
| 1  | 3.508872000  | -5.218485000 | 3.287506000  | 6  | 2.258823000  | 3.207687000  | 0.385732000  |
| 6  | 1.606267000  | 0.932194000  | 4.284776000  | 6  | 4.938697000  | 3.139529000  | -0.347815000 |
| 6  | 1.053324000  | -0.267334000 | 4.658386000  | 1  | 4.693790000  | 1.033471000  | -0.311314000 |
| 6  | 0.754121000  | -1.244516000 | 3.719960000  | 6  | 2.957485000  | 4.411133000  | 0.305487000  |
| 6  | 0.966524000  | -1.103015000 | 2.362501000  | 1  | 1.225059000  | 3.222366000  | 0.666355000  |
| 6  | 1.569228000  | 0.123262000  | 1.961309000  | 6  | 4.262653000  | 4.356738000  | -0.186082000 |
| 6  | 1.866777000  | 1.095870000  | 2.918460000  | 6  | 3.075909000  | -0.841211000 | -0.316218000 |
| 6  | 0.707639000  | -2.301842000 | 1.520444000  | 6  | 3.011299000  | -1.308433000 | -1.610341000 |
| 6  | 1.420351000  | -3.437302000 | 1.859687000  | 6  | 4.040444000  | -1.358677000 | 0.538381000  |
| 6  | 1.279973000  | -4.661734000 | 1.223858000  | 6  | 3.928320000  | -2.228025000 | -2.116968000 |
| 6  | 0.392890000  | -4.826730000 | 0.189262000  | 1  | 2.222761000  | -0.939558000 | -2.228286000 |
| 6  | -0.374410000 | -3.707101000 | -0.153741000 | 6  | 4.985118000  | -2.262206000 | 0.092095000  |
| 6  | -0.252043000 | -2.467726000 | 0.481314000  | 1  | 4.033091000  | -1.055474000 | 1.561170000  |
| 15 | 1.870141000  | 0.439895000  | 0.176641000  | 6  | 4.967323000  | -2.613211000 | -1.272492000 |
| 15 | -1.269628000 | -1.053354000 | -0.112252000 | 8  | 0.226888000  | -2.331581000 | 4.371462000  |
| 1  | 1.854825000  | 1.701035000  | 5.011158000  | 8  | 2.375270000  | -3.559691000 | 2.839591000  |
| 1  | 2.345778000  | 2.014683000  | 2.596606000  | 8  | 0.714127000  | -0.721799000 | 5.904315000  |
| 1  | 0.271985000  | -5.780166000 | -0.317463000 | 8  | 2.137264000  | -5.565355000 | 1.791085000  |
| 1  | -1.117087000 | -3.819136000 | -0.936877000 | 6  | 5.937391000  | -2.957837000 | 1.091717000  |
| 6  | -2.586767000 | -1.861134000 | -1.109313000 | 6  | 3.675985000  | -2.769790000 | -3.546486000 |
| 6  | -3.821861000 | -2.214357000 | -0.586388000 | 6  | 6.462756000  | 3.082358000  | -0.597218000 |
| 6  | -2.336521000 | -2.120063000 | -2.443010000 | 6  | 2.251895000  | 5.680407000  | 0.852306000  |
| 6  | -4.828552000 | -2.731253000 | -1.381620000 | 6  | -6.146918000 | -3.230232000 | -0.747441000 |
| 1  | -3.998747000 | -2.060412000 | 0.451773000  | 6  | -2.833272000 | -3.085313000 | -4.710200000 |
| 6  | -3.294954000 | -2.680196000 | -3.285750000 | 6  | -3.179876000 | 3.037112000  | 2.552499000  |
| 1  | -1.373677000 | -1.868427000 | -2.836162000 | 6  | -3.678142000 | -1.651154000 | 4.653642000  |
|    |              |              |              | 29 | 0.133247000  | 0.255150000  | -1.173379000 |

|   |              |              |              |   |              |              |              |
|---|--------------|--------------|--------------|---|--------------|--------------|--------------|
| 8 | 4.933804000  | 5.529246000  | -0.529799000 | 1 | -3.330641000 | -3.643228000 | 5.382334000  |
| 8 | -4.549148000 | 1.074137000  | 4.394220000  | 6 | -3.033847000 | -1.022109000 | 5.913833000  |
| 6 | -5.922085000 | 1.280264000  | 3.947773000  | 1 | -3.450642000 | -0.043031000 | 6.093428000  |
| 6 | 4.548510000  | 6.095919000  | -1.819109000 | 1 | -3.227539000 | -1.651422000 | 6.778070000  |
| 1 | 3.506173000  | 6.370827000  | -1.818151000 | 1 | -1.962902000 | -0.925766000 | 5.785900000  |
| 1 | 5.163874000  | 6.971223000  | -1.951039000 | 6 | -3.538951000 | 3.608501000  | 3.945705000  |
| 1 | 4.726390000  | 5.388064000  | -2.614032000 | 1 | -4.564710000 | 3.438748000  | 4.219579000  |
| 6 | 3.153294000  | 6.928943000  | 1.013287000  | 1 | -2.909350000 | 3.179044000  | 4.713858000  |
| 1 | 4.059260000  | 6.693967000  | 1.552516000  | 1 | -3.372631000 | 4.679749000  | 3.920655000  |
| 1 | 3.424894000  | 7.375011000  | 0.072095000  | 6 | -4.163168000 | 3.575588000  | 1.491886000  |
| 1 | 2.594120000  | 7.666682000  | 1.578423000  | 1 | -3.873895000 | 3.252837000  | 0.501180000  |
| 6 | 1.039488000  | 6.049205000  | -0.029205000 | 1 | -5.173441000 | 3.235962000  | 1.681976000  |
| 1 | 0.329514000  | 5.234778000  | -0.081623000 | 1 | -4.164810000 | 4.660390000  | 1.501663000  |
| 1 | 0.532477000  | 6.914594000  | 0.385400000  | 6 | -1.767318000 | 3.597138000  | 2.227520000  |
| 1 | 1.354826000  | 6.290621000  | -1.037627000 | 1 | -1.028019000 | 3.157826000  | 2.887512000  |
| 6 | 1.751556000  | 5.352094000  | 2.286138000  | 1 | -1.478485000 | 3.412539000  | 1.201994000  |
| 1 | 1.043747000  | 4.537014000  | 2.298680000  | 1 | -1.771717000 | 4.671278000  | 2.373135000  |
| 1 | 2.590953000  | 5.093805000  | 2.922300000  | 1 | -6.309434000 | 0.388043000  | 3.478636000  |
| 1 | 1.260069000  | 6.223721000  | 2.704173000  | 1 | -5.978033000 | 2.101205000  | 3.253286000  |
| 6 | 6.987172000  | 1.628062000  | -0.577713000 | 1 | -6.488088000 | 1.509519000  | 4.836370000  |
| 1 | 6.770719000  | 1.136551000  | 0.363374000  | 6 | -7.379295000 | -2.434287000 | -1.230440000 |
| 1 | 6.568236000  | 1.038918000  | -1.386122000 | 1 | -7.584932000 | -2.640142000 | -2.266471000 |
| 1 | 8.063868000  | 1.651609000  | -0.702757000 | 1 | -8.248013000 | -2.728466000 | -0.650443000 |
| 6 | 7.179794000  | 3.849238000  | 0.540168000  | 1 | -7.225564000 | -1.368955000 | -1.094878000 |
| 1 | 8.253937000  | 3.814717000  | 0.385959000  | 6 | -6.112135000 | -3.118947000 | 0.794103000  |
| 1 | 6.858896000  | 4.879135000  | 0.556449000  | 1 | -5.287240000 | -3.680794000 | 1.216353000  |
| 1 | 6.957203000  | 3.391755000  | 1.498083000  | 1 | -6.040376000 | -2.088143000 | 1.122917000  |
| 6 | 6.862984000  | 3.689192000  | -1.960058000 | 1 | -7.033497000 | -3.532503000 | 1.188164000  |
| 1 | 6.288782000  | 3.240419000  | -2.763577000 | 6 | -6.329392000 | -4.726867000 | -1.098307000 |
| 1 | 6.713836000  | 4.754946000  | -1.961570000 | 1 | -7.247906000 | -5.098433000 | -0.654411000 |
| 1 | 7.914769000  | 3.496396000  | -2.145107000 | 1 | -6.376416000 | -4.857097000 | -2.168117000 |
| 6 | -5.198542000 | -1.806296000 | 4.877109000  | 1 | -5.501232000 | -5.306541000 | -0.705171000 |
| 1 | -5.688608000 | -2.141735000 | 3.969248000  | 6 | -2.548703000 | -1.827316000 | -5.561652000 |
| 1 | -5.371749000 | -2.550346000 | 5.647780000  | 1 | -3.447519000 | -1.239073000 | -5.699887000 |
| 1 | -5.636835000 | -0.879793000 | 5.203094000  | 1 | -1.802939000 | -1.195848000 | -5.095695000 |
| 6 | -3.100654000 | -3.075358000 | 4.487162000  | 1 | -2.181396000 | -2.119952000 | -6.540110000 |
| 1 | -3.552043000 | -3.591722000 | 3.646089000  | 6 | -1.517406000 | -3.898798000 | -4.571093000 |
| 1 | -2.027909000 | -3.055828000 | 4.360236000  | 1 | -1.188754000 | -4.217688000 | -5.554054000 |

|   |              |              |              |                       |              |              |              |
|---|--------------|--------------|--------------|-----------------------|--------------|--------------|--------------|
| 1 | -0.719887000 | -3.320212000 | -4.130606000 | 1                     | 1.577167000  | -2.599206000 | 5.903602000  |
| 1 | -1.684548000 | -4.780593000 | -3.962531000 | 6                     | -3.806023000 | -4.013161000 | -5.478497000 |
| 6 | 2.149342000  | -2.984356000 | -3.736753000 | 1                     | -4.099409000 | -4.859088000 | -4.872900000 |
| 1 | 1.756806000  | -3.622300000 | -2.953486000 | 1                     | -4.697357000 | -3.508956000 | -5.808236000 |
| 1 | 1.597254000  | -2.054866000 | -3.733582000 | 1                     | -3.288623000 | -4.379707000 | -6.358358000 |
| 1 | 1.978013000  | -3.461841000 | -4.694633000 | 6                     | -3.909825000 | 6.150387000  | -2.458730000 |
| 6 | 4.144618000  | -1.742867000 | -4.602227000 | 6                     | -4.924173000 | 7.093046000  | -2.355027000 |
| 1 | 5.211376000  | -1.573113000 | -4.546155000 | 6                     | -6.211897000 | 6.705811000  | -1.997637000 |
| 1 | 3.911179000  | -2.105308000 | -5.598465000 | 6                     | -6.468278000 | 5.361785000  | -1.745213000 |
| 1 | 3.642940000  | -0.794542000 | -4.459302000 | 6                     | -5.451040000 | 4.421532000  | -1.842975000 |
| 6 | 4.325997000  | -4.147276000 | -3.822323000 | 6                     | -4.146150000 | 4.792634000  | -2.199046000 |
| 1 | 3.952418000  | -4.514249000 | -4.771965000 | 6                     | -3.067387000 | 3.796182000  | -2.315293000 |
| 1 | 5.398494000  | -4.104498000 | -3.876060000 | 6                     | -3.331723000 | 2.461600000  | -2.669571000 |
| 1 | 4.057483000  | -4.856415000 | -3.049561000 | 6                     | -2.316273000 | 1.546914000  | -2.860745000 |
| 6 | 7.426893000  | -2.658332000 | 0.816376000  | 6                     | -0.950923000 | 1.892129000  | -2.721640000 |
| 1 | 7.600758000  | -1.588519000 | 0.767028000  | 6                     | -1.723772000 | 4.133500000  | -2.113562000 |
| 1 | 8.028727000  | -3.061050000 | 1.624587000  | 6                     | -0.697980000 | 3.217070000  | -2.303441000 |
| 1 | 7.750343000  | -3.117883000 | -0.100870000 | 6                     | 0.116346000  | 0.938725000  | -3.044986000 |
| 6 | 5.648242000  | -2.516495000 | 2.544978000  | 6                     | 1.398382000  | 1.551613000  | -3.579732000 |
| 1 | 5.860657000  | -1.462589000 | 2.692203000  | 1                     | -7.008612000 | 7.443716000  | -1.919943000 |
| 1 | 4.622271000  | -2.714639000 | 2.821427000  | 1                     | -4.708821000 | 8.139222000  | -2.569285000 |
| 1 | 6.298591000  | -3.077587000 | 3.207406000  | 1                     | -2.917354000 | 6.466364000  | -2.778146000 |
| 6 | 5.688986000  | -4.484568000 | 1.006368000  | 1                     | -5.664827000 | 3.378268000  | -1.612826000 |
| 1 | 5.936501000  | -4.847102000 | 0.021010000  | 1                     | -7.470007000 | 5.041693000  | -1.460598000 |
| 1 | 6.306404000  | -4.998308000 | 1.737840000  | 1                     | -1.471124000 | 5.147290000  | -1.801740000 |
| 1 | 4.648654000  | -4.710201000 | 1.206457000  | 1                     | -4.359934000 | 2.150056000  | -2.856582000 |
| 8 | -5.638225000 | -3.208317000 | -3.586387000 | 1                     | -2.566042000 | 0.529989000  | -3.162170000 |
| 8 | 6.019543000  | -3.396481000 | -1.744477000 | 1                     | 0.333925000  | 3.538939000  | -2.159873000 |
| 6 | -6.214121000 | -2.094873000 | -4.334288000 | 1                     | -0.275941000 | 0.184455000  | -3.741153000 |
| 1 | -5.494553000 | -1.685587000 | -5.023832000 | 1                     | 1.220945000  | 2.238309000  | -4.428539000 |
| 1 | -7.052298000 | -2.505909000 | -4.873571000 | 1                     | 2.085836000  | 0.774058000  | -3.934382000 |
| 1 | -6.545044000 | -1.316229000 | -3.664167000 | 1                     | 1.954320000  | 2.119549000  | -2.820344000 |
| 6 | 7.070786000  | -2.693976000 | -2.470352000 |                       |              |              |              |
| 1 | 7.380630000  | -1.808196000 | -1.935536000 |                       |              |              |              |
| 1 | 7.891543000  | -3.389098000 | -2.545328000 |                       |              |              |              |
| 1 | 6.734289000  | -2.418989000 | -3.455321000 |                       |              |              |              |
| 6 | 0.596554000  | -2.120635000 | 5.721037000  |                       |              |              |              |
| 1 | -0.177389000 | -2.515392000 | 6.381610000  |                       |              |              |              |
|   |              |              |              | <b>L1-inner-TS2-I</b> |              |              |              |
|   |              |              |              | 6                     | 1.292256000  | 1.525289000  | -1.867226000 |

|    |              |              |              |    |              |              |              |
|----|--------------|--------------|--------------|----|--------------|--------------|--------------|
| 8  | 0.395876000  | 1.328740000  | -2.694805000 | 6  | -4.880393000 | -0.204126000 | 3.223349000  |
| 8  | 2.498906000  | 1.434145000  | -1.829874000 | 6  | 2.537647000  | -0.959082000 | 1.398314000  |
| 6  | -2.147383000 | -5.435060000 | -2.574260000 | 6  | 3.706908000  | -1.672681000 | 1.215844000  |
| 1  | -3.125390000 | -5.771127000 | -2.182829000 | 6  | 2.460878000  | -0.081679000 | 2.467843000  |
| 1  | -1.537874000 | -6.277982000 | -2.904539000 | 6  | 4.817531000  | -1.480894000 | 2.022128000  |
| 6  | -0.659590000 | -3.487153000 | 3.150520000  | 1  | 3.749721000  | -2.379806000 | 0.422957000  |
| 6  | -1.773915000 | -3.933048000 | 2.484190000  | 6  | 3.530920000  | 0.140043000  | 3.328618000  |
| 6  | -2.055719000 | -3.515034000 | 1.189766000  | 1  | 1.538405000  | 0.428911000  | 2.641851000  |
| 6  | -1.265155000 | -2.636577000 | 0.474440000  | 6  | 4.738955000  | -0.512631000 | 3.032465000  |
| 6  | -0.080987000 | -2.201643000 | 1.135728000  | 6  | 1.775448000  | -2.243877000 | -1.061518000 |
| 6  | 0.185928000  | -2.625684000 | 2.438575000  | 6  | 2.283087000  | -1.703070000 | -2.219789000 |
| 6  | -1.698045000 | -2.342081000 | -0.919351000 | 6  | 1.814201000  | -3.626650000 | -0.895644000 |
| 6  | -1.812726000 | -3.412036000 | -1.786799000 | 6  | 2.882482000  | -2.484363000 | -3.207211000 |
| 6  | -2.343735000 | -3.310307000 | -3.066408000 | 1  | 2.260631000  | -0.650052000 | -2.359939000 |
| 6  | -2.773947000 | -2.109143000 | -3.571167000 | 6  | 2.440183000  | -4.444036000 | -1.814284000 |
| 6  | -2.687156000 | -1.007942000 | -2.712298000 | 1  | 1.347664000  | -4.054259000 | -0.038287000 |
| 6  | -2.183660000 | -1.096645000 | -1.414292000 | 6  | 3.055309000  | -3.833922000 | -2.927223000 |
| 15 | 1.120750000  | -1.135351000 | 0.238127000  | 8  | -3.222802000 | -4.110626000 | 0.781986000  |
| 15 | -2.091921000 | 0.404464000  | -0.362100000 | 8  | -1.466099000 | -4.719616000 | -1.558794000 |
| 1  | -0.427707000 | -3.810554000 | 4.161515000  | 8  | -2.751865000 | -4.792376000 | 2.901534000  |
| 1  | 1.102261000  | -2.293773000 | 2.917205000  | 8  | -2.354794000 | -4.542371000 | -3.652863000 |
| 1  | -3.185534000 | -2.022868000 | -4.572733000 | 6  | 2.357877000  | -5.981626000 | -1.680095000 |
| 1  | -3.050098000 | -0.049209000 | -3.067486000 | 6  | 3.213066000  | -1.749746000 | -4.531418000 |
| 6  | -3.060947000 | 1.686176000  | -1.254520000 | 6  | 6.067229000  | -2.367434000 | 1.818680000  |
| 6  | -4.339773000 | 2.072866000  | -0.875866000 | 6  | 3.316189000  | 1.054391000  | 4.563821000  |
| 6  | -2.477803000 | 2.299974000  | -2.347191000 | 6  | -6.462374000 | 3.447158000  | -1.146622000 |
| 6  | -4.996611000 | 3.114247000  | -1.507296000 | 6  | -2.431807000 | 3.762124000  | -4.373689000 |
| 1  | -4.815587000 | 1.558135000  | -0.075251000 | 6  | -3.090687000 | 0.896453000  | 4.789437000  |
| 6  | -3.115732000 | 3.314053000  | -3.055270000 | 6  | -6.352626000 | -1.883281000 | 1.941674000  |
| 1  | -1.506050000 | 1.981657000  | -2.654782000 | 29 | 0.142164000  | 0.796292000  | -0.318873000 |
| 6  | -4.324659000 | 3.783165000  | -2.544837000 | 8  | 5.890218000  | -0.268906000 | 3.777368000  |
| 6  | -3.143184000 | 0.031373000  | 1.087000000  | 8  | -5.857922000 | -0.175495000 | 4.216339000  |
| 6  | -2.812471000 | 0.542920000  | 2.321079000  | 6  | -6.627927000 | 1.063265000  | 4.272404000  |
| 6  | -4.303457000 | -0.729832000 | 0.969304000  | 6  | 6.694343000  | 0.923261000  | 3.539664000  |
| 6  | -3.652689000 | 0.412906000  | 3.429557000  | 1  | 6.551796000  | 1.614410000  | 4.352917000  |
| 1  | -1.882620000 | 1.058113000  | 2.433449000  | 1  | 7.725323000  | 0.610881000  | 3.519485000  |
| 6  | -5.176394000 | -0.884682000 | 2.026459000  | 1  | 6.433456000  | 1.390506000  | 2.600790000  |
| 1  | -4.507248000 | -1.205740000 | 0.036403000  | 6  | 4.043688000  | 0.509266000  | 5.817424000  |

|   |              |              |              |   |              |              |              |
|---|--------------|--------------|--------------|---|--------------|--------------|--------------|
| 1 | 3.654407000  | -0.472015000 | 6.068153000  | 1 | -3.344583000 | 0.784053000  | 6.912790000  |
| 1 | 5.102760000  | 0.414969000  | 5.670071000  | 6 | -2.858611000 | 2.424301000  | 4.757589000  |
| 1 | 3.852481000  | 1.173739000  | 6.653043000  | 1 | -2.187613000 | 2.710821000  | 3.956960000  |
| 6 | 3.742418000  | 2.508834000  | 4.257330000  | 1 | -3.796030000 | 2.950374000  | 4.617277000  |
| 1 | 3.169328000  | 2.902753000  | 3.427332000  | 1 | -2.422595000 | 2.750289000  | 5.696201000  |
| 1 | 3.557095000  | 3.132899000  | 5.125962000  | 6 | -1.735966000 | 0.171357000  | 5.003414000  |
| 1 | 4.787536000  | 2.587068000  | 4.007712000  | 1 | -1.892071000 | -0.900186000 | 5.041720000  |
| 6 | 1.817759000  | 1.112750000  | 4.951490000  | 1 | -1.030265000 | 0.379149000  | 4.213502000  |
| 1 | 1.223391000  | 1.649480000  | 4.223346000  | 1 | -1.295976000 | 0.494134000  | 5.940553000  |
| 1 | 1.408731000  | 0.118383000  | 5.081637000  | 1 | -7.159704000 | 1.221643000  | 3.346751000  |
| 1 | 1.726476000  | 1.644478000  | 5.891647000  | 1 | -5.980115000 | 1.905832000  | 4.457541000  |
| 6 | 5.815977000  | -3.476258000 | 0.769578000  | 1 | -7.322685000 | 0.941737000  | 5.087545000  |
| 1 | 4.980523000  | -4.107936000 | 1.047434000  | 6 | -6.624941000 | 4.871940000  | -0.572779000 |
| 1 | 5.634394000  | -3.067328000 | -0.217597000 | 1 | -6.447070000 | 5.611397000  | -1.333906000 |
| 1 | 6.702505000  | -4.098102000 | 0.715058000  | 1 | -7.639078000 | 5.000965000  | -0.208459000 |
| 6 | 6.427860000  | -3.077168000 | 3.145662000  | 1 | -5.943149000 | 5.032275000  | 0.255853000  |
| 1 | 7.309334000  | -3.693926000 | 3.000412000  | 6 | -7.024005000 | 2.467692000  | -0.090980000 |
| 1 | 6.620377000  | -2.356651000 | 3.922567000  | 1 | -6.974321000 | 1.440810000  | -0.433003000 |
| 1 | 5.610886000  | -3.720475000 | 3.455289000  | 1 | -6.497458000 | 2.549145000  | 0.853698000  |
| 6 | 7.264864000  | -1.538067000 | 1.307724000  | 1 | -8.065766000 | 2.712336000  | 0.083380000  |
| 1 | 6.994971000  | -0.998036000 | 0.406820000  | 6 | -7.331407000 | 3.301970000  | -2.419404000 |
| 1 | 7.598074000  | -0.837997000 | 2.052165000  | 1 | -8.367719000 | 3.525535000  | -2.184699000 |
| 1 | 8.093003000  | -2.200010000 | 1.075486000  | 1 | -6.988517000 | 3.980434000  | -3.184742000 |
| 6 | -7.735772000 | -1.215524000 | 2.096468000  | 1 | -7.277198000 | 2.285891000  | -2.794865000 |
| 1 | -7.854201000 | -0.405236000 | 1.385298000  | 6 | -1.098144000 | 4.481512000  | -4.066703000 |
| 1 | -8.510588000 | -1.949950000 | 1.902332000  | 1 | -1.260609000 | 5.363103000  | -3.456531000 |
| 1 | -7.872483000 | -0.841658000 | 3.096390000  | 1 | -0.415974000 | 3.817702000  | -3.551647000 |
| 6 | -6.353430000 | -2.634901000 | 0.591256000  | 1 | -0.627566000 | 4.792133000  | -4.994053000 |
| 1 | -6.544847000 | -1.963369000 | -0.239291000 | 6 | -2.108219000 | 2.482792000  | -5.196854000 |
| 1 | -5.416510000 | -3.148111000 | 0.424778000  | 1 | -1.673704000 | 2.773396000  | -6.147193000 |
| 1 | -7.151167000 | -3.369457000 | 0.609231000  | 1 | -1.397700000 | 1.843155000  | -4.693360000 |
| 6 | -6.157334000 | -2.931056000 | 3.066299000  | 1 | -3.016811000 | 1.923853000  | -5.394046000 |
| 1 | -6.223207000 | -2.455847000 | 4.033022000  | 6 | 1.897615000  | -1.077808000 | -5.019834000 |
| 1 | -6.926385000 | -3.694665000 | 2.995508000  | 1 | 1.138975000  | -1.832881000 | -5.195034000 |
| 1 | -5.185589000 | -3.401366000 | 2.977674000  | 1 | 1.507926000  | -0.356892000 | -4.316555000 |
| 6 | -3.940604000 | 0.553533000  | 6.036365000  | 1 | 2.090406000  | -0.561552000 | -5.954671000 |
| 1 | -4.846211000 | 1.133611000  | 6.096664000  | 6 | 4.272328000  | -0.650416000 | -4.280997000 |
| 1 | -4.202641000 | -0.493282000 | 6.060219000  | 1 | 5.196940000  | -1.083225000 | -3.913371000 |

|   |              |              |              |                        |              |              |              |
|---|--------------|--------------|--------------|------------------------|--------------|--------------|--------------|
| 1 | 4.486913000  | -0.136604000 | -5.212826000 | 6                      | 7.904058000  | 6.104651000  | 0.226310000  |
| 1 | 3.923152000  | 0.083444000  | -3.566033000 | 6                      | 6.741684000  | 5.355884000  | 0.091455000  |
| 6 | 3.680985000  | -2.652723000 | -5.695979000 | 6                      | 5.485633000  | 5.973328000  | 0.059969000  |
| 1 | 3.691676000  | -2.048971000 | -6.596747000 | 6                      | 4.250223000  | 5.178673000  | -0.081015000 |
| 1 | 4.676928000  | -3.039106000 | -5.552627000 | 6                      | 3.173633000  | 5.643851000  | -0.839503000 |
| 1 | 3.008617000  | -3.484829000 | -5.845396000 | 6                      | 2.013040000  | 4.890365000  | -0.967449000 |
| 6 | 3.738116000  | -6.638832000 | -1.466201000 | 6                      | 1.879096000  | 3.651094000  | -0.341632000 |
| 1 | 4.254813000  | -6.184057000 | -0.627870000 | 6                      | 4.118305000  | 3.928996000  | 0.538441000  |
| 1 | 3.605246000  | -7.694106000 | -1.250043000 | 6                      | 2.959057000  | 3.181943000  | 0.412056000  |
| 1 | 4.343745000  | -6.552338000 | -2.351923000 | 6                      | 0.600966000  | 2.887252000  | -0.433130000 |
| 6 | 1.458620000  | -6.394903000 | -0.492284000 | 1                      | 8.748407000  | 8.078038000  | 0.434799000  |
| 1 | 1.885790000  | -6.093007000 | 0.458342000  | 1                      | 6.531247000  | 9.202538000  | 0.386751000  |
| 1 | 0.467118000  | -5.972747000 | -0.588430000 | 1                      | 4.465561000  | 7.865390000  | 0.170154000  |
| 1 | 1.375112000  | -7.476349000 | -0.486157000 | 1                      | 6.803536000  | 4.274028000  | -0.024929000 |
| 6 | 1.711289000  | -6.547685000 | -2.967090000 | 1                      | 8.870714000  | 5.602705000  | 0.237196000  |
| 1 | 2.320755000  | -6.317416000 | -3.826498000 | 1                      | 4.938495000  | 3.546382000  | 1.146064000  |
| 1 | 1.603934000  | -7.625166000 | -2.883458000 | 1                      | 3.257656000  | 6.597140000  | -1.361797000 |
| 1 | 0.730941000  | -6.108451000 | -3.103836000 | 1                      | 1.189790000  | 5.270247000  | -1.574335000 |
| 8 | -4.906636000 | 4.941626000  | -3.058693000 | 1                      | 2.895264000  | 2.197790000  | 0.876070000  |
| 8 | 3.850612000  | -4.630194000 | -3.750868000 | 6                      | -0.096571000 | 2.992593000  | 0.947012000  |
| 6 | -4.306471000 | 6.187684000  | -2.593706000 | 1                      | -0.001102000 | 4.029137000  | 1.311867000  |
| 1 | -3.269628000 | 6.242909000  | -2.882036000 | 1                      | 0.354556000  | 2.363900000  | 1.730088000  |
| 1 | -4.866149000 | 6.978122000  | -3.067331000 | 1                      | -1.167914000 | 2.772742000  | 0.892165000  |
| 1 | -4.380139000 | 6.268017000  | -1.519731000 | 1                      | -0.072712000 | 3.376168000  | -1.145620000 |
| 6 | 5.286770000  | -4.475131000 | -3.546042000 |                        |              |              |              |
| 1 | 5.564929000  | -4.793794000 | -2.552882000 |                        |              |              |              |
| 1 | 5.759152000  | -5.101341000 | -4.285564000 |                        |              |              |              |
| 1 | 5.583204000  | -3.447780000 | -3.683972000 |                        |              |              |              |
| 6 | -3.384477000 | -5.180482000 | 1.694712000  |                        |              |              |              |
| 1 | -4.446233000 | -5.356050000 | 1.873673000  |                        |              |              |              |
| 1 | -2.882635000 | -6.078819000 | 1.290140000  |                        |              |              |              |
| 6 | -3.299827000 | 4.648317000  | -5.297908000 |                        |              |              |              |
| 1 | -4.273939000 | 4.208653000  | -5.459954000 |                        |              |              |              |
| 1 | -3.438079000 | 5.645939000  | -4.917252000 |                        |              |              |              |
| 1 | -2.792667000 | 4.727722000  | -6.253080000 |                        |              |              |              |
| 6 | 5.435421000  | 7.368315000  | 0.166357000  |                        |              |              |              |
| 6 | 6.596711000  | 8.118908000  | 0.298868000  |                        |              |              |              |
| 6 | 7.837645000  | 7.490572000  | 0.330886000  |                        |              |              |              |
|   |              |              |              | <b>L1-inner-TS2-II</b> |              |              |              |
|   |              |              |              | 8                      | 0.180632000  | 4.047931000  | -0.411934000 |
|   |              |              |              | 6                      | -0.246603000 | 2.991822000  | -0.046461000 |
|   |              |              |              | 8                      | -0.628147000 | 2.412710000  | 0.967539000  |
|   |              |              |              | 29                     | 0.076417000  | 0.863803000  | -0.503357000 |
|   |              |              |              | 15                     | 2.182124000  | 0.597219000  | 0.217984000  |
|   |              |              |              | 15                     | -0.999017000 | -1.093681000 | -0.069456000 |
|   |              |              |              | 1                      | 2.664398000  | -5.579695000 | 2.900092000  |
|   |              |              |              | 6                      | 3.267187000  | -5.096413000 | 2.110381000  |
|   |              |              |              | 6                      | 0.476132000  | -2.612944000 | 5.338370000  |
|   |              |              |              | 6                      | 2.195141000  | 0.323009000  | 4.346259000  |
|   |              |              |              | 6                      | 1.564085000  | -0.877704000 | 4.539794000  |
|   |              |              |              | 6                      | 1.200094000  | -1.684418000 | 3.468614000  |

|   |              |              |              |   |              |              |              |
|---|--------------|--------------|--------------|---|--------------|--------------|--------------|
| 6 | 1.408419000  | -1.340815000 | 2.145325000  | 6 | -2.294206000 | -2.383357000 | 2.051745000  |
| 6 | 2.025124000  | -0.074779000 | 1.924791000  | 6 | -3.316289000 | -0.045202000 | 3.148823000  |
| 6 | 2.412246000  | 0.701638000  | 3.017796000  | 1 | -2.137219000 | 0.936494000  | 1.668177000  |
| 6 | 1.185650000  | -2.412442000 | 1.133827000  | 6 | -3.131964000 | -2.491283000 | 3.152637000  |
| 6 | 1.997560000  | -3.523818000 | 1.256923000  | 1 | -1.873812000 | -3.266905000 | 1.628993000  |
| 6 | 1.879960000  | -4.664564000 | 0.474890000  | 6 | -3.700616000 | -1.302043000 | 3.641981000  |
| 6 | 0.905065000  | -4.768734000 | -0.484282000 | 8 | 1.282802000  | -1.511643000 | 5.711648000  |
| 6 | 0.047469000  | -3.669270000 | -0.616827000 | 8 | 0.703970000  | -2.863655000 | 3.959810000  |
| 6 | 0.167936000  | -2.504751000 | 0.144453000  | 8 | 3.033419000  | -3.700539000 | 2.137278000  |
| 1 | 2.518664000  | 0.942099000  | 5.178206000  | 8 | 2.841338000  | -5.563913000 | 0.841121000  |
| 1 | 2.912373000  | 1.644442000  | 2.838590000  | 1 | 4.333044000  | -5.294248000 | 2.236165000  |
| 1 | 0.786179000  | -5.662836000 | -1.090018000 | 1 | 0.762335000  | -3.494153000 | 5.921231000  |
| 1 | -0.764007000 | -3.748285000 | -1.330360000 | 1 | -0.583427000 | -2.358002000 | 5.491216000  |
| 6 | 3.198237000  | 2.114542000  | 0.437121000  | 8 | 5.336655000  | 5.683097000  | 0.715059000  |
| 6 | 2.659427000  | 3.198206000  | 1.107193000  | 8 | 6.237640000  | -2.536183000 | -2.819309000 |
| 6 | 4.486673000  | 2.219105000  | -0.054390000 | 8 | -4.625728000 | -1.327138000 | 4.684744000  |
| 6 | 3.348680000  | 4.389358000  | 1.282550000  | 6 | -6.013194000 | -1.688241000 | 4.429867000  |
| 1 | 1.688829000  | 3.095172000  | 1.530890000  | 1 | -6.189293000 | -2.697417000 | 4.762138000  |
| 6 | 5.218019000  | 3.390906000  | 0.059846000  | 1 | -6.624106000 | -1.015071000 | 5.008275000  |
| 1 | 4.923214000  | 1.372800000  | -0.527608000 | 1 | -6.255955000 | -1.594009000 | 3.380768000  |
| 6 | 4.609156000  | 4.494701000  | 0.676757000  | 6 | -3.767918000 | 1.276748000  | 3.812226000  |
| 6 | 3.320001000  | -0.531521000 | -0.653207000 | 6 | -3.350276000 | -3.903267000 | 3.761875000  |
| 6 | 3.165161000  | -0.722405000 | -2.006875000 | 6 | -3.443684000 | -3.868786000 | 5.306368000  |
| 6 | 4.375322000  | -1.163498000 | -0.003602000 | 1 | -4.235260000 | -3.235711000 | 5.659469000  |
| 6 | 4.072546000  | -1.467294000 | -2.762223000 | 1 | -3.594683000 | -4.877702000 | 5.674546000  |
| 1 | 2.324092000  | -0.275915000 | -2.493116000 | 1 | -2.515966000 | -3.494214000 | 5.722374000  |
| 6 | 5.315071000  | -1.898446000 | -0.697873000 | 6 | -2.150430000 | -4.833027000 | 3.428493000  |
| 1 | 4.445508000  | -1.074255000 | 1.057155000  | 1 | -2.143054000 | -5.129202000 | 2.386603000  |
| 6 | 5.194539000  | -1.955959000 | -2.100565000 | 1 | -1.206568000 | -4.357773000 | 3.655366000  |
| 6 | -2.246314000 | -1.707421000 | -1.297368000 | 1 | -2.243530000 | -5.738789000 | 4.017619000  |
| 6 | -1.887425000 | -2.053871000 | -2.594468000 | 6 | -4.603091000 | -4.576636000 | 3.154227000  |
| 6 | -3.587412000 | -1.759556000 | -0.965655000 | 1 | -4.486553000 | -4.673691000 | 2.081751000  |
| 6 | -2.822685000 | -2.398814000 | -3.557837000 | 1 | -4.723022000 | -5.570527000 | 3.574202000  |
| 1 | -0.852021000 | -2.040368000 | -2.862854000 | 1 | -5.506048000 | -4.018970000 | 3.345183000  |
| 6 | -4.577412000 | -2.061586000 | -1.895120000 | 6 | -3.350586000 | 1.269641000  | 5.302231000  |
| 6 | -4.177795000 | -2.301505000 | -3.209070000 | 1 | -3.667574000 | 2.194675000  | 5.773853000  |
| 6 | -1.970743000 | -1.164707000 | 1.482552000  | 1 | -3.796645000 | 0.435655000  | 5.819430000  |
| 6 | -2.451151000 | -0.003709000 | 2.061977000  | 1 | -2.270862000 | 1.201719000  | 5.381365000  |



|   |              |              |              |   |              |              |              |
|---|--------------|--------------|--------------|---|--------------|--------------|--------------|
| 6 | -5.293291000 | 1.483488000  | 3.686076000  | 6 | 7.829013000  | -2.342218000 | -0.297712000 |
| 1 | -5.836571000 | 0.760690000  | 4.266959000  | 1 | 7.984889000  | -1.276287000 | -0.170907000 |
| 1 | -5.554142000 | 2.471699000  | 4.050216000  | 1 | 8.508776000  | -2.862582000 | 0.368821000  |
| 1 | -5.600597000 | 1.413611000  | 2.647495000  | 1 | 8.068761000  | -2.625993000 | -1.307300000 |
| 6 | -3.100613000 | 2.506184000  | 3.154159000  | 6 | 6.685566000  | 3.424319000  | -0.424754000 |
| 1 | -2.021447000 | 2.456989000  | 3.190634000  | 6 | 7.161082000  | 2.034751000  | -0.910987000 |
| 1 | -3.397520000 | 2.628163000  | 2.119157000  | 1 | 7.073129000  | 1.286755000  | -0.132112000 |
| 1 | -3.417400000 | 3.390562000  | 3.696209000  | 1 | 6.609202000  | 1.701348000  | -1.782916000 |
| 6 | 4.990352000  | 6.788000000  | -0.169425000 | 1 | 8.207108000  | 2.111136000  | -1.186656000 |
| 1 | 4.371254000  | 6.452787000  | -0.989151000 | 6 | 7.611243000  | 3.833162000  | 0.745994000  |
| 1 | 4.479198000  | 7.549995000  | 0.393376000  | 1 | 8.641614000  | 3.863950000  | 0.404573000  |
| 1 | 5.916840000  | 7.188862000  | -0.547696000 | 1 | 7.331993000  | 4.801040000  | 1.127244000  |
| 6 | 7.163306000  | -1.589340000 | -3.433720000 | 1 | 7.539320000  | 3.104288000  | 1.546321000  |
| 1 | 7.919487000  | -2.188127000 | -3.915130000 | 6 | 6.865939000  | 4.393278000  | -1.613096000 |
| 1 | 6.655176000  | -0.977915000 | -4.161862000 | 1 | 6.699085000  | 5.410624000  | -1.310073000 |
| 1 | 7.609516000  | -0.953023000 | -2.685329000 | 1 | 7.879119000  | 4.317615000  | -1.995351000 |
| 6 | 6.376999000  | -2.730755000 | 0.057236000  | 1 | 6.178204000  | 4.143309000  | -2.413870000 |
| 6 | 3.705801000  | -1.721107000 | -4.246094000 | 6 | 2.674845000  | 5.493572000  | 2.138116000  |
| 6 | 2.238581000  | -2.225443000 | -4.291483000 | 6 | 3.695973000  | 6.251346000  | 3.019358000  |
| 1 | 2.135428000  | -3.122303000 | -3.691860000 | 1 | 4.478772000  | 6.710289000  | 2.445195000  |
| 1 | 1.538130000  | -1.487036000 | -3.928618000 | 1 | 3.173757000  | 7.012385000  | 3.589197000  |
| 1 | 1.969382000  | -2.457337000 | -5.315603000 | 1 | 4.159192000  | 5.562772000  | 3.718942000  |
| 6 | 4.534975000  | -2.818409000 | -4.957029000 | 6 | 1.871779000  | 6.455234000  | 1.229657000  |
| 1 | 4.058394000  | -3.029901000 | -5.908008000 | 1 | 1.146275000  | 5.890625000  | 0.661289000  |
| 1 | 5.547517000  | -2.515509000 | -5.158362000 | 1 | 1.351552000  | 7.184490000  | 1.843769000  |
| 1 | 4.562190000  | -3.727221000 | -4.373264000 | 1 | 2.505278000  | 6.990967000  | 0.540520000  |
| 6 | 3.807352000  | -0.405829000 | -5.051356000 | 6 | 1.648040000  | 4.875682000  | 3.126374000  |
| 1 | 4.825546000  | -0.036235000 | -5.061599000 | 1 | 0.781198000  | 4.468025000  | 2.624101000  |
| 1 | 3.496990000  | -0.575253000 | -6.077378000 | 1 | 2.104502000  | 4.101905000  | 3.734005000  |
| 1 | 3.173305000  | 0.364062000  | -4.627769000 | 1 | 1.299401000  | 5.660941000  | 3.787620000  |
| 6 | 6.145165000  | -4.221298000 | -0.295467000 | 1 | -3.874157000 | -1.540012000 | 0.036428000  |
| 1 | 6.282254000  | -4.376515000 | -1.355247000 | 8 | -5.141177000 | -2.422420000 | -4.201422000 |
| 1 | 6.856790000  | -4.840086000 | 0.243732000  | 6 | -5.501870000 | -1.171172000 | -4.855459000 |
| 1 | 5.142403000  | -4.528994000 | -0.024451000 | 1 | -4.646821000 | -0.745539000 | -5.359750000 |
| 6 | 6.231209000  | -2.574136000 | 1.587978000  | 1 | -6.269717000 | -1.421415000 | -5.569215000 |
| 1 | 6.439832000  | -1.557420000 | 1.904667000  | 1 | -5.877238000 | -0.458963000 | -4.135216000 |
| 1 | 5.244023000  | -2.853163000 | 1.926778000  | 6 | -6.032013000 | -2.124789000 | -1.360646000 |
| 1 | 6.956055000  | -3.222833000 | 2.067797000  | 6 | -6.474124000 | -0.714450000 | -0.906123000 |

|   |              |              |              |
|---|--------------|--------------|--------------|
| 1 | -6.462627000 | -0.023023000 | -1.740225000 |
| 1 | -7.483781000 | -0.755118000 | -0.509979000 |
| 1 | -5.821556000 | -0.326364000 | -0.132905000 |
| 6 | -6.056006000 | -3.078695000 | -0.137726000 |
| 1 | -5.740889000 | -4.073284000 | -0.432559000 |
| 1 | -5.413840000 | -2.738307000 | 0.661366000  |
| 1 | -7.067654000 | -3.140478000 | 0.249202000  |
| 6 | -7.093440000 | -2.672293000 | -2.344072000 |
| 1 | -8.015439000 | -2.809250000 | -1.789171000 |
| 1 | -7.294155000 | -1.991787000 | -3.154428000 |
| 1 | -6.794879000 | -3.621550000 | -2.762864000 |
| 6 | -2.282219000 | -2.884571000 | -4.929013000 |
| 6 | -1.238453000 | -4.003624000 | -4.666350000 |
| 1 | -0.401814000 | -3.660400000 | -4.075551000 |
| 1 | -1.707692000 | -4.835776000 | -4.153139000 |
| 1 | -0.848692000 | -4.361529000 | -5.612864000 |
| 6 | -1.598758000 | -1.710438000 | -5.665997000 |
| 1 | -2.313543000 | -0.923164000 | -5.873814000 |
| 1 | -0.793224000 | -1.287794000 | -5.080352000 |
| 1 | -1.188299000 | -2.056350000 | -6.609345000 |
| 6 | -3.329189000 | -3.511724000 | -5.881557000 |
| 1 | -3.907656000 | -4.277519000 | -5.386185000 |
| 1 | -4.010143000 | -2.782271000 | -6.285308000 |
| 1 | -2.791430000 | -3.961310000 | -6.709466000 |
| 6 | -0.750985000 | 2.208745000  | -1.977253000 |
| 6 | -2.099728000 | 2.849038000  | -1.911609000 |
| 6 | -3.205688000 | 2.175329000  | -1.379261000 |
| 6 | -2.305778000 | 4.151294000  | -2.378372000 |
| 6 | -4.454479000 | 2.775510000  | -1.319974000 |
| 1 | -3.085011000 | 1.155697000  | -1.009882000 |
| 6 | -3.554918000 | 4.752973000  | -2.323281000 |
| 1 | -1.454303000 | 4.707753000  | -2.770219000 |
| 6 | -4.657833000 | 4.077857000  | -1.791473000 |
| 1 | -5.299955000 | 2.216357000  | -0.920052000 |
| 1 | -3.671868000 | 5.780119000  | -2.669780000 |
| 6 | -0.785179000 | 1.066723000  | -3.001243000 |
| 1 | -1.014579000 | 1.489237000  | -3.996257000 |
| 1 | 0.173938000  | 0.537175000  | -3.101490000 |

|   |              |             |              |
|---|--------------|-------------|--------------|
| 1 | -1.556222000 | 0.326329000 | -2.790226000 |
| 6 | -5.987942000 | 4.713043000 | -1.727477000 |
| 6 | -6.426932000 | 5.569131000 | -2.744723000 |
| 6 | -6.850204000 | 4.476446000 | -0.649800000 |
| 6 | -7.679575000 | 6.166590000 | -2.687643000 |
| 1 | -5.781491000 | 5.746337000 | -3.604793000 |
| 6 | -8.104435000 | 5.070718000 | -0.592540000 |
| 1 | -6.515583000 | 3.838650000 | 0.168161000  |
| 6 | -8.526047000 | 5.919373000 | -1.611345000 |
| 1 | -8.000568000 | 6.823794000 | -3.494715000 |
| 1 | -8.753443000 | 4.878231000 | 0.260770000  |
| 1 | -9.508215000 | 6.386992000 | -1.565899000 |
| 1 | -0.019342000 | 2.933440000 | -2.344655000 |

**L1-inner-TS2-III**

|    |              |              |              |
|----|--------------|--------------|--------------|
| 6  | -1.068236000 | -0.098968000 | 5.710024000  |
| 1  | -0.860741000 | -0.647188000 | 6.636400000  |
| 1  | -2.137580000 | 0.136114000  | 5.619467000  |
| 6  | 0.276209000  | -4.507648000 | 1.490269000  |
| 6  | 1.168731000  | -3.997602000 | 2.397833000  |
| 6  | 1.235876000  | -2.633120000 | 2.654674000  |
| 6  | 0.457633000  | -1.691880000 | 2.010349000  |
| 6  | -0.429597000 | -2.201694000 | 1.016884000  |
| 6  | -0.512241000 | -3.576139000 | 0.801625000  |
| 6  | 0.569455000  | -0.299394000 | 2.540288000  |
| 6  | 0.067685000  | -0.043874000 | 3.801165000  |
| 6  | 0.296738000  | 1.145073000  | 4.483420000  |
| 6  | 1.086307000  | 2.140004000  | 3.964105000  |
| 6  | 1.610314000  | 1.911023000  | 2.685971000  |
| 6  | 1.344504000  | 0.746654000  | 1.967114000  |
| 15 | -1.357537000 | -1.003743000 | -0.028132000 |
| 15 | 1.976002000  | 0.447979000  | 0.285107000  |
| 1  | 0.192013000  | -5.575084000 | 1.305631000  |
| 1  | -1.216391000 | -3.949463000 | 0.066393000  |
| 1  | 1.295743000  | 3.050101000  | 4.519451000  |
| 1  | 2.253611000  | 2.668032000  | 2.248361000  |
| 6  | 2.696283000  | 2.013145000  | -0.349909000 |
| 6  | 3.817870000  | 1.922470000  | -1.144787000 |

|   |              |              |              |    |              |              |              |
|---|--------------|--------------|--------------|----|--------------|--------------|--------------|
| 6 | 2.090453000  | 3.256644000  | -0.195962000 | 6  | 5.647656000  | 2.766746000  | -2.622613000 |
| 6 | 4.333897000  | 3.013666000  | -1.838550000 | 6  | 2.001918000  | 5.780231000  | -0.513363000 |
| 1 | 4.284469000  | 0.972180000  | -1.259259000 | 6  | 4.783241000  | -3.827025000 | -0.971197000 |
| 6 | 2.563976000  | 4.379025000  | -0.851967000 | 6  | 6.605667000  | -0.631724000 | 2.701773000  |
| 1 | 1.230608000  | 3.338905000  | 0.429588000  | 29 | 0.380205000  | -0.067832000 | -1.199196000 |
| 6 | 3.635995000  | 4.214282000  | -1.749032000 | 8  | -4.711507000 | -3.785983000 | -4.118443000 |
| 6 | 3.434272000  | -0.619721000 | 0.556826000  | 8  | 7.030904000  | -2.685512000 | 0.728620000  |
| 6 | 3.578317000  | -1.791979000 | -0.145809000 | 6  | 7.946606000  | -2.314205000 | -0.345299000 |
| 6 | 4.425393000  | -0.251285000 | 1.459720000  | 6  | -4.520676000 | -3.095221000 | -5.389977000 |
| 6 | 4.745897000  | -2.554548000 | -0.087500000 | 1  | -3.498179000 | -3.177531000 | -5.719504000 |
| 1 | 2.776470000  | -2.125857000 | -0.758635000 | 1  | -5.177555000 | -3.583858000 | -6.091425000 |
| 6 | 5.589462000  | -0.978873000 | 1.589028000  | 1  | -4.780341000 | -2.051393000 | -5.298798000 |
| 1 | 4.269996000  | 0.614428000  | 2.063148000  | 6  | -2.747823000 | -5.694296000 | -4.515161000 |
| 6 | 5.775165000  | -2.079699000 | 0.722602000  | 1  | -3.535952000 | -6.078885000 | -3.883202000 |
| 6 | -2.435024000 | -2.014608000 | -1.124012000 | 1  | -3.198236000 | -5.258216000 | -5.390124000 |
| 6 | -3.815051000 | -1.868634000 | -1.143599000 | 1  | -2.130058000 | -6.523538000 | -4.841907000 |
| 6 | -1.846685000 | -2.874976000 | -2.033443000 | 6  | -0.805332000 | -4.090328000 | -4.711978000 |
| 6 | -4.596745000 | -2.485261000 | -2.106035000 | 1  | -0.084795000 | -3.484352000 | -4.178770000 |
| 1 | -4.272907000 | -1.245585000 | -0.412046000 | 1  | -0.270616000 | -4.884641000 | -5.223469000 |
| 6 | -2.593380000 | -3.592261000 | -2.964429000 | 1  | -1.289462000 | -3.474364000 | -5.460918000 |
| 1 | -0.784444000 | -2.980039000 | -2.031868000 | 6  | -1.076041000 | -5.569965000 | -2.702888000 |
| 6 | -3.951784000 | -3.289816000 | -3.059890000 | 1  | -0.322419000 | -5.001726000 | -2.176370000 |
| 6 | -2.502717000 | -0.279976000 | 1.208345000  | 1  | -1.768772000 | -5.992637000 | -1.983086000 |
| 6 | -2.584336000 | 1.084758000  | 1.433545000  | 1  | -0.575718000 | -6.384081000 | -3.215548000 |
| 6 | -3.222556000 | -1.136535000 | 2.021275000  | 6  | -6.604670000 | -1.513207000 | -0.854535000 |
| 6 | -3.427696000 | 1.603368000  | 2.408436000  | 1  | -6.266766000 | -1.923933000 | 0.087869000  |
| 1 | -1.973085000 | 1.737601000  | 0.850021000  | 1  | -6.259594000 | -0.487788000 | -0.934078000 |
| 6 | -4.086760000 | -0.680827000 | 3.005872000  | 1  | -7.688662000 | -1.501052000 | -0.843943000 |
| 1 | -3.089057000 | -2.187826000 | 1.892186000  | 6  | -6.734403000 | -3.784467000 | -1.881223000 |
| 6 | -4.246589000 | 0.704875000  | 3.111521000  | 1  | -7.817806000 | -3.725964000 | -1.838761000 |
| 8 | 2.142858000  | -2.412479000 | 3.650674000  | 1  | -6.447347000 | -4.412656000 | -2.710335000 |
| 8 | -0.658208000 | -0.881037000 | 4.598725000  | 1  | -6.379061000 | -4.229725000 | -0.958262000 |
| 8 | 2.048811000  | -4.655215000 | 3.203483000  | 6  | -6.728295000 | -1.713873000 | -3.324201000 |
| 8 | -0.319542000 | 1.108161000  | 5.695099000  | 1  | -6.241536000 | -0.766549000 | -3.532125000 |
| 6 | -4.724690000 | -1.747530000 | 3.935595000  | 1  | -6.624142000 | -2.365774000 | -4.173269000 |
| 6 | -3.374463000 | 3.103459000  | 2.787550000  | 1  | -7.785827000 | -1.524150000 | -3.172386000 |
| 6 | -6.137338000 | -2.367098000 | -2.054830000 | 6  | 7.957456000  | -0.141642000 | 2.137827000  |
| 6 | -1.841432000 | -4.705005000 | -3.744006000 | 1  | 7.806958000  | 0.669208000  | 1.433247000  |

|   |             |              |              |   |              |              |              |
|---|-------------|--------------|--------------|---|--------------|--------------|--------------|
| 1 | 8.575846000 | 0.225017000  | 2.950756000  | 1 | 2.057625000  | 6.749407000  | -2.457950000 |
| 1 | 8.486348000 | -0.943706000 | 1.653673000  | 1 | 0.582510000  | 5.826114000  | -2.170567000 |
| 6 | 6.071115000 | 0.486987000  | 3.626158000  | 1 | 0.831030000  | 7.376816000  | -1.380961000 |
| 1 | 5.964316000 | 1.428582000  | 3.098790000  | 6 | 0.950243000  | 5.714083000  | 0.617032000  |
| 1 | 5.118908000 | 0.218282000  | 4.068102000  | 1 | 0.641275000  | 6.724611000  | 0.858311000  |
| 1 | 6.783857000 | 0.637527000  | 4.429005000  | 1 | 0.067758000  | 5.160668000  | 0.318157000  |
| 6 | 6.834618000 | -1.882507000 | 3.584050000  | 1 | 1.356264000  | 5.267841000  | 1.517185000  |
| 1 | 7.205386000 | -2.700484000 | 2.987249000  | 6 | -2.245161000 | 3.831727000  | 2.026970000  |
| 1 | 7.554724000 | -1.654228000 | 4.363821000  | 1 | -1.281231000 | 3.375108000  | 2.216910000  |
| 1 | 5.904630000 | -2.177007000 | 4.058452000  | 1 | -2.431160000 | 3.849123000  | 0.960783000  |
| 6 | 5.769863000 | -4.910276000 | -0.476826000 | 1 | -2.204471000 | 4.857647000  | 2.375287000  |
| 1 | 6.798297000 | -4.605512000 | -0.523744000 | 6 | -4.689213000 | 3.847846000  | 2.468620000  |
| 1 | 5.548415000 | -5.178813000 | 0.549734000  | 1 | -5.482961000 | 3.518728000  | 3.117426000  |
| 1 | 5.645247000 | -5.793225000 | -1.093770000 | 1 | -4.545784000 | 4.911251000  | 2.631084000  |
| 6 | 5.099169000 | -3.409842000 | -2.428933000 | 1 | -4.976601000 | 3.701968000  | 1.435189000  |
| 1 | 4.390468000 | -2.663202000 | -2.767486000 | 6 | -3.067881000 | 3.232013000  | 4.300847000  |
| 1 | 6.094439000 | -2.994647000 | -2.517657000 | 1 | -3.002807000 | 4.282697000  | 4.566798000  |
| 1 | 5.034433000 | -4.274712000 | -3.082110000 | 1 | -3.851635000 | 2.772408000  | 4.881723000  |
| 6 | 3.385421000 | -4.507815000 | -0.978444000 | 1 | -2.123468000 | 2.761923000  | 4.545797000  |
| 1 | 3.046570000 | -4.697534000 | 0.032649000  | 6 | -5.907218000 | -2.446376000 | 3.227786000  |
| 1 | 2.639375000 | -3.925271000 | -1.498572000 | 1 | -5.582131000 | -2.893801000 | 2.295912000  |
| 1 | 3.471084000 | -5.458512000 | -1.493475000 | 1 | -6.303936000 | -3.232906000 | 3.861952000  |
| 1 | 7.896212000 | -1.253904000 | -0.544476000 | 1 | -6.707635000 | -1.751961000 | 3.009292000  |
| 1 | 7.716968000 | -2.860561000 | -1.243331000 | 6 | -3.653818000 | -2.831451000 | 4.255967000  |
| 1 | 8.932092000 | -2.581191000 | 0.001118000  | 1 | -3.449537000 | -3.466450000 | 3.404098000  |
| 6 | 5.343327000 | 1.918084000  | -3.879914000 | 1 | -2.722403000 | -2.376602000 | 4.564575000  |
| 1 | 4.741631000 | 2.477348000  | -4.585700000 | 1 | -4.022502000 | -3.470265000 | 5.050487000  |
| 1 | 6.270978000 | 1.643253000  | -4.372830000 | 6 | -5.196013000 | -1.194508000 | 5.302227000  |
| 1 | 4.799570000 | 1.017458000  | -3.623826000 | 1 | -6.044480000 | -0.539815000 | 5.221265000  |
| 6 | 6.624964000 | 1.969436000  | -1.712432000 | 1 | -5.470853000 | -2.033574000 | 5.931342000  |
| 1 | 6.811471000 | 2.512845000  | -0.792890000 | 1 | -4.400608000 | -0.646990000 | 5.790872000  |
| 1 | 6.254150000 | 0.985751000  | -1.463086000 | 8 | 3.979478000  | 5.301125000  | -2.552101000 |
| 1 | 7.566761000 | 1.843729000  | -2.235169000 | 8 | -5.218812000 | 1.239143000  | 3.955912000  |
| 6 | 6.418312000 | 4.047564000  | -3.022934000 | 6 | 3.463533000  | 5.249993000  | -3.917534000 |
| 1 | 7.389950000 | 3.749822000  | -3.401727000 | 1 | 3.721948000  | 6.196598000  | -4.364380000 |
| 1 | 5.924457000 | 4.614345000  | -3.791631000 | 1 | 3.919747000  | 4.444358000  | -4.467014000 |
| 1 | 6.565158000 | 4.694530000  | -2.168216000 | 1 | 2.392547000  | 5.115563000  | -3.916185000 |
| 6 | 1.327148000 | 6.472606000  | -1.718328000 | 6 | -6.575937000 | 1.269158000  | 3.423406000  |



|   |              |              |              |   |              |              |              |
|---|--------------|--------------|--------------|---|--------------|--------------|--------------|
| 6 | 3.165161000  | -0.722405000 | -2.006875000 | 6 | -3.443684000 | -3.868786000 | 5.306368000  |
| 6 | 4.375322000  | -1.163498000 | -0.003602000 | 1 | -4.235260000 | -3.235711000 | 5.659469000  |
| 6 | 4.072546000  | -1.467294000 | -2.762223000 | 1 | -3.594683000 | -4.877702000 | 5.674546000  |
| 1 | 2.324092000  | -0.275915000 | -2.493116000 | 1 | -2.515966000 | -3.494214000 | 5.722374000  |
| 6 | 5.315071000  | -1.898446000 | -0.697873000 | 6 | -2.150430000 | -4.833027000 | 3.428493000  |
| 1 | 4.445508000  | -1.074255000 | 1.057155000  | 1 | -2.143054000 | -5.129202000 | 2.386603000  |
| 6 | 5.194539000  | -1.955959000 | -2.100565000 | 1 | -1.206568000 | -4.357773000 | 3.655366000  |
| 6 | -2.246314000 | -1.707421000 | -1.297368000 | 1 | -2.243530000 | -5.738789000 | 4.017619000  |
| 6 | -1.887425000 | -2.053871000 | -2.594468000 | 6 | -4.603091000 | -4.576636000 | 3.154227000  |
| 6 | -3.587412000 | -1.759556000 | -0.965655000 | 1 | -4.486553000 | -4.673691000 | 2.081751000  |
| 6 | -2.822685000 | -2.398814000 | -3.557837000 | 1 | -4.723022000 | -5.570527000 | 3.574202000  |
| 1 | -0.852021000 | -2.040368000 | -2.862854000 | 1 | -5.506048000 | -4.018970000 | 3.345183000  |
| 6 | -4.577412000 | -2.061586000 | -1.895120000 | 6 | -3.350586000 | 1.269641000  | 5.302231000  |
| 6 | -4.177795000 | -2.301505000 | -3.209070000 | 1 | -3.667574000 | 2.194675000  | 5.773853000  |
| 6 | -1.970743000 | -1.164707000 | 1.482552000  | 1 | -3.796645000 | 0.435655000  | 5.819430000  |
| 6 | -2.451151000 | -0.003709000 | 2.061977000  | 1 | -2.270862000 | 1.201719000  | 5.381365000  |
| 6 | -2.294206000 | -2.383357000 | 2.051745000  | 6 | -5.293291000 | 1.483488000  | 3.686076000  |
| 6 | -3.316289000 | -0.045202000 | 3.148823000  | 1 | -5.836571000 | 0.760690000  | 4.266959000  |
| 1 | -2.137219000 | 0.936494000  | 1.668177000  | 1 | -5.554142000 | 2.471699000  | 4.050216000  |
| 6 | -3.131964000 | -2.491283000 | 3.152637000  | 1 | -5.600597000 | 1.413611000  | 2.647495000  |
| 1 | -1.873812000 | -3.266905000 | 1.628993000  | 6 | -3.100613000 | 2.506184000  | 3.154159000  |
| 6 | -3.700616000 | -1.302043000 | 3.641981000  | 1 | -2.021447000 | 2.456989000  | 3.190634000  |
| 8 | 1.282802000  | -1.511643000 | 5.711648000  | 1 | -3.397520000 | 2.628163000  | 2.119157000  |
| 8 | 0.703970000  | -2.863655000 | 3.959810000  | 1 | -3.417400000 | 3.390562000  | 3.696209000  |
| 8 | 3.033419000  | -3.700539000 | 2.137278000  | 6 | 4.990352000  | 6.788000000  | -0.169425000 |
| 8 | 2.841338000  | -5.563913000 | 0.841121000  | 1 | 4.371254000  | 6.452787000  | -0.989151000 |
| 1 | 4.333044000  | -5.294248000 | 2.236165000  | 1 | 4.479198000  | 7.549995000  | 0.393376000  |
| 1 | 0.762335000  | -3.494153000 | 5.921231000  | 1 | 5.916840000  | 7.188862000  | -0.547696000 |
| 1 | -0.583427000 | -2.358002000 | 5.491216000  | 6 | 7.163306000  | -1.589340000 | -3.433720000 |
| 8 | 5.336655000  | 5.683097000  | 0.715059000  | 1 | 7.919487000  | -2.188127000 | -3.915130000 |
| 8 | 6.237640000  | -2.536183000 | -2.819309000 | 1 | 6.655176000  | -0.977915000 | -4.161862000 |
| 8 | -4.625728000 | -1.327138000 | 4.684744000  | 1 | 7.609516000  | -0.953023000 | -2.685329000 |
| 6 | -6.013194000 | -1.688241000 | 4.429867000  | 6 | 6.376999000  | -2.730755000 | 0.057236000  |
| 1 | -6.189293000 | -2.697417000 | 4.762138000  | 6 | 3.705801000  | -1.721107000 | -4.246094000 |
| 1 | -6.624106000 | -1.015071000 | 5.008275000  | 6 | 2.238581000  | -2.225443000 | -4.291483000 |
| 1 | -6.255955000 | -1.594009000 | 3.380768000  | 1 | 2.135428000  | -3.122303000 | -3.691860000 |
| 6 | -3.767918000 | 1.276748000  | 3.812226000  | 1 | 1.538130000  | -1.487036000 | -3.928618000 |
| 6 | -3.350276000 | -3.903267000 | 3.761875000  | 1 | 1.969382000  | -2.457337000 | -5.315603000 |

|   |             |              |              |   |              |              |              |
|---|-------------|--------------|--------------|---|--------------|--------------|--------------|
| 6 | 4.534975000 | -2.818409000 | -4.957029000 | 6 | 1.871779000  | 6.455234000  | 1.229657000  |
| 1 | 4.058394000 | -3.029901000 | -5.908008000 | 1 | 1.146275000  | 5.890625000  | 0.661289000  |
| 1 | 5.547517000 | -2.515509000 | -5.158362000 | 1 | 1.351552000  | 7.184490000  | 1.843769000  |
| 1 | 4.562190000 | -3.727221000 | -4.373264000 | 1 | 2.505278000  | 6.990967000  | 0.540520000  |
| 6 | 3.807352000 | -0.405829000 | -5.051356000 | 6 | 1.648040000  | 4.875682000  | 3.126374000  |
| 1 | 4.825546000 | -0.036235000 | -5.061599000 | 1 | 0.781198000  | 4.468025000  | 2.624101000  |
| 1 | 3.496990000 | -0.575253000 | -6.077378000 | 1 | 2.104502000  | 4.101905000  | 3.734005000  |
| 1 | 3.173305000 | 0.364062000  | -4.627769000 | 1 | 1.299401000  | 5.660941000  | 3.787620000  |
| 6 | 6.145165000 | -4.221298000 | -0.295467000 | 1 | -3.874157000 | -1.540012000 | 0.036428000  |
| 1 | 6.282254000 | -4.376515000 | -1.355247000 | 8 | -5.141177000 | -2.422420000 | -4.201422000 |
| 1 | 6.856790000 | -4.840086000 | 0.243732000  | 6 | -5.501870000 | -1.171172000 | -4.855459000 |
| 1 | 5.142403000 | -4.528994000 | -0.024451000 | 1 | -4.646821000 | -0.745539000 | -5.359750000 |
| 6 | 6.231209000 | -2.574136000 | 1.587978000  | 1 | -6.269717000 | -1.421415000 | -5.569215000 |
| 1 | 6.439832000 | -1.557420000 | 1.904667000  | 1 | -5.877238000 | -0.458963000 | -4.135216000 |
| 1 | 5.244023000 | -2.853163000 | 1.926778000  | 6 | -6.032013000 | -2.124789000 | -1.360646000 |
| 1 | 6.956055000 | -3.222833000 | 2.067797000  | 6 | -6.474124000 | -0.714450000 | -0.906123000 |
| 6 | 7.829013000 | -2.342218000 | -0.297712000 | 1 | -6.462627000 | -0.023023000 | -1.740225000 |
| 1 | 7.984889000 | -1.276287000 | -0.170907000 | 1 | -7.483781000 | -0.755118000 | -0.509979000 |
| 1 | 8.508776000 | -2.862582000 | 0.368821000  | 1 | -5.821556000 | -0.326364000 | -0.132905000 |
| 1 | 8.068761000 | -2.625993000 | -1.307300000 | 6 | -6.056006000 | -3.078695000 | -0.137726000 |
| 6 | 6.685566000 | 3.424319000  | -0.424754000 | 1 | -5.740889000 | -4.073284000 | -0.432559000 |
| 6 | 7.161082000 | 2.034751000  | -0.910987000 | 1 | -5.413840000 | -2.738307000 | 0.661366000  |
| 1 | 7.073129000 | 1.286755000  | -0.132112000 | 1 | -7.067654000 | -3.140478000 | 0.249202000  |
| 1 | 6.609202000 | 1.701348000  | -1.782916000 | 6 | -7.093440000 | -2.672293000 | -2.344072000 |
| 1 | 8.207108000 | 2.111136000  | -1.186656000 | 1 | -8.015439000 | -2.809250000 | -1.789171000 |
| 6 | 7.611243000 | 3.833162000  | 0.745994000  | 1 | -7.294155000 | -1.991787000 | -3.154428000 |
| 1 | 8.641614000 | 3.863950000  | 0.404573000  | 1 | -6.794879000 | -3.621550000 | -2.762864000 |
| 1 | 7.331993000 | 4.801040000  | 1.127244000  | 6 | -2.282219000 | -2.884571000 | -4.929013000 |
| 1 | 7.539320000 | 3.104288000  | 1.546321000  | 6 | -1.238453000 | -4.003624000 | -4.666350000 |
| 6 | 6.865939000 | 4.393278000  | -1.613096000 | 1 | -0.401814000 | -3.660400000 | -4.075551000 |
| 1 | 6.699085000 | 5.410624000  | -1.310073000 | 1 | -1.707692000 | -4.835776000 | -4.153139000 |
| 1 | 7.879119000 | 4.317615000  | -1.995351000 | 1 | -0.848692000 | -4.361529000 | -5.612864000 |
| 1 | 6.178204000 | 4.143309000  | -2.413870000 | 6 | -1.598758000 | -1.710438000 | -5.665997000 |
| 6 | 2.674845000 | 5.493572000  | 2.138116000  | 1 | -2.313543000 | -0.923164000 | -5.873814000 |
| 6 | 3.695973000 | 6.251346000  | 3.019358000  | 1 | -0.793224000 | -1.287794000 | -5.080352000 |
| 1 | 4.478772000 | 6.710289000  | 2.445195000  | 1 | -1.188299000 | -2.056350000 | -6.609345000 |
| 1 | 3.173757000 | 7.012385000  | 3.589197000  | 6 | -3.329189000 | -3.511724000 | -5.881557000 |
| 1 | 4.159192000 | 5.562772000  | 3.718942000  | 1 | -3.907656000 | -4.277519000 | -5.386185000 |





|    |              |              |              |   |              |              |              |
|----|--------------|--------------|--------------|---|--------------|--------------|--------------|
| 6  | -2.481607000 | -0.138572000 | 1.165134000  | 1 | -1.949202000 | -4.496543000 | -3.868988000 |
| 6  | -2.512937000 | 1.193430000  | 1.535567000  | 1 | -1.111153000 | -4.304089000 | -5.402847000 |
| 6  | -3.193862000 | -1.061409000 | 1.919722000  | 6 | -6.769001000 | -1.194541000 | -0.432459000 |
| 6  | -3.321132000 | 1.640190000  | 2.577360000  | 1 | -6.252903000 | -1.885753000 | 0.222820000  |
| 1  | -1.901816000 | 1.888384000  | 1.004860000  | 1 | -6.470047000 | -0.182566000 | -0.181213000 |
| 6  | -4.031446000 | -0.670622000 | 2.949057000  | 1 | -7.832446000 | -1.287221000 | -0.243207000 |
| 1  | -3.072884000 | -2.098732000 | 1.702476000  | 6 | -7.027793000 | -2.950752000 | -2.185691000 |
| 6  | -4.172953000 | 0.706476000  | 3.170157000  | 1 | -8.085699000 | -3.009051000 | -1.948777000 |
| 8  | 1.444295000  | -3.770527000 | 2.931286000  | 1 | -6.883104000 | -3.215265000 | -3.221598000 |
| 8  | -0.711043000 | -2.323008000 | 4.272349000  | 1 | -6.497793000 | -3.660389000 | -1.559705000 |
| 8  | 0.924623000  | -5.716485000 | 1.861211000  | 6 | -7.341262000 | -0.510158000 | -2.749485000 |
| 8  | -0.103099000 | -0.917823000 | 5.956297000  | 1 | -6.927674000 | 0.489589000  | -2.670694000 |
| 6  | -4.621127000 | -1.720113000 | 3.922390000  | 1 | -7.378317000 | -0.802554000 | -3.783984000 |
| 6  | -3.136857000 | 3.059382000  | 3.169342000  | 1 | -8.357683000 | -0.486944000 | -2.370392000 |
| 6  | -6.510043000 | -1.515901000 | -1.922378000 | 6 | 6.966842000  | -2.923114000 | 2.254023000  |
| 6  | -2.554451000 | -2.737601000 | -5.010186000 | 1 | 7.139052000  | -1.855726000 | 2.163942000  |
| 6  | 6.445987000  | 2.519096000  | -0.977505000 | 1 | 7.422659000  | -3.263684000 | 3.178212000  |
| 6  | 2.819666000  | 5.437096000  | 1.284455000  | 1 | 7.448292000  | -3.433176000 | 1.436603000  |
| 6  | 3.888094000  | -3.538075000 | -2.620895000 | 6 | 4.887725000  | -2.688450000 | 3.613631000  |
| 6  | 5.454974000  | -3.230741000 | 2.280848000  | 1 | 5.083527000  | -1.628880000 | 3.736502000  |
| 29 | 0.186679000  | 0.626149000  | -0.875705000 | 1 | 3.821105000  | -2.865083000 | 3.680009000  |
| 8  | -5.444611000 | -1.993606000 | -4.551129000 | 1 | 5.376048000  | -3.208300000 | 4.430550000  |
| 8  | 5.935151000  | -3.995746000 | -0.452941000 | 6 | 5.229955000  | -4.762195000 | 2.286294000  |
| 6  | 7.107659000  | -3.405247000 | -1.089625000 | 1 | 5.634685000  | -5.208879000 | 1.393252000  |
| 6  | -5.537124000 | -0.886986000 | -5.498424000 | 1 | 5.709937000  | -5.199755000 | 3.156359000  |
| 1  | -4.643165000 | -0.820374000 | -6.094983000 | 1 | 4.168259000  | -4.971727000 | 2.332607000  |
| 1  | -6.384037000 | -1.109596000 | -6.127177000 | 6 | 4.534469000  | -4.945347000 | -2.635848000 |
| 1  | -5.691243000 | 0.047695000  | -4.980458000 | 1 | 5.607581000  | -4.916776000 | -2.580927000 |
| 6  | -3.574353000 | -3.550806000 | -5.845616000 | 1 | 4.170884000  | -5.544495000 | -1.811193000 |
| 1  | -4.144862000 | -4.220284000 | -5.216023000 | 1 | 4.256944000  | -5.431788000 | -3.564467000 |
| 1  | -4.265240000 | -2.931081000 | -6.388205000 | 6 | 4.511628000  | -2.670013000 | -3.736492000 |
| 1  | -3.019481000 | -4.142479000 | -6.565220000 | 1 | 4.034562000  | -1.700688000 | -3.785991000 |
| 6  | -1.849770000 | -1.706767000 | -5.919018000 | 1 | 5.569559000  | -2.516176000 | -3.569700000 |
| 1  | -1.067641000 | -1.188199000 | -5.381372000 | 1 | 4.388675000  | -3.159124000 | -4.697642000 |
| 1  | -1.399830000 | -2.210692000 | -6.768299000 | 6 | 2.389549000  | -3.772588000 | -2.958121000 |
| 1  | -2.548112000 | -0.970201000 | -6.294581000 | 1 | 1.903033000  | -4.318062000 | -2.158394000 |
| 6  | -1.496517000 | -3.774359000 | -4.539195000 | 1 | 1.853238000  | -2.849774000 | -3.122366000 |
| 1  | -0.655751000 | -3.315496000 | -4.039555000 | 1 | 2.320291000  | -4.354859000 | -3.870081000 |

|   |              |              |              |   |              |              |              |
|---|--------------|--------------|--------------|---|--------------|--------------|--------------|
| 1 | 7.386903000  | -2.484360000 | -0.599437000 | 1 | -6.588962000 | -0.904929000 | 4.359659000  |
| 1 | 6.917082000  | -3.211527000 | -2.131551000 | 6 | -4.090532000 | -3.136467000 | 3.600598000  |
| 1 | 7.894337000  | -4.135515000 | -0.989166000 | 1 | -4.435309000 | -3.486409000 | 2.633214000  |
| 6 | 6.501608000  | 3.051842000  | -2.426819000 | 1 | -3.009294000 | -3.162489000 | 3.629367000  |
| 1 | 6.402692000  | 4.122870000  | -2.442099000 | 1 | -4.469925000 | -3.821550000 | 4.350839000  |
| 1 | 7.461848000  | 2.799203000  | -2.866004000 | 6 | -4.131225000 | -1.358511000 | 5.346431000  |
| 1 | 5.720756000  | 2.613484000  | -3.036290000 | 1 | -4.522772000 | -0.398711000 | 5.645449000  |
| 6 | 6.853239000  | 1.027315000  | -1.030877000 | 1 | -4.463925000 | -2.113038000 | 6.053243000  |
| 1 | 6.827032000  | 0.569636000  | -0.047983000 | 1 | -3.050188000 | -1.315522000 | 5.359022000  |
| 1 | 6.220455000  | 0.460010000  | -1.704140000 | 8 | 5.216812000  | 5.081948000  | -0.503345000 |
| 1 | 7.869897000  | 0.967652000  | -1.402875000 | 8 | -5.168505000 | 1.151639000  | 4.042670000  |
| 6 | 7.491344000  | 3.246082000  | -0.098660000 | 6 | 4.696515000  | 5.802696000  | -1.671221000 |
| 1 | 8.479061000  | 3.125575000  | -0.532868000 | 1 | 4.236572000  | 6.719354000  | -1.340725000 |
| 1 | 7.259500000  | 4.296208000  | -0.029655000 | 1 | 5.543767000  | 6.035984000  | -2.294772000 |
| 1 | 7.503020000  | 2.818825000  | 0.898862000  | 1 | 3.984379000  | 5.198674000  | -2.211474000 |
| 6 | 1.812877000  | 6.109057000  | 0.323425000  | 6 | -6.441126000 | 1.461641000  | 3.383269000  |
| 1 | 2.258566000  | 6.340358000  | -0.631477000 | 1 | -6.301933000 | 2.217340000  | 2.628924000  |
| 1 | 0.970806000  | 5.452010000  | 0.142720000  | 1 | -6.854882000 | 0.577905000  | 2.927195000  |
| 1 | 1.440859000  | 7.029316000  | 0.763373000  | 1 | -7.093221000 | 1.822296000  | 4.162471000  |
| 6 | 2.077066000  | 5.162325000  | 2.620660000  | 6 | 1.298801000  | -5.166853000 | 3.111682000  |
| 1 | 1.831583000  | 6.111594000  | 3.083051000  | 1 | 2.247092000  | -5.598812000 | 3.436107000  |
| 1 | 1.149125000  | 4.625259000  | 2.481662000  | 1 | 0.494368000  | -5.353234000 | 3.847593000  |
| 1 | 2.708767000  | 4.604148000  | 3.302553000  | 6 | 3.964265000  | 6.412469000  | 1.652459000  |
| 6 | -1.989685000 | 3.812473000  | 2.463570000  | 1 | 4.642434000  | 5.937972000  | 2.353299000  |
| 1 | -1.064482000 | 3.248358000  | 2.493283000  | 1 | 4.538612000  | 6.723759000  | 0.801598000  |
| 1 | -2.244213000 | 4.036445000  | 1.436329000  | 1 | 3.535078000  | 7.285609000  | 2.131690000  |
| 1 | -1.826301000 | 4.751301000  | 2.980437000  | 6 | -3.573737000 | 5.069232000  | -1.175147000 |
| 6 | -4.387027000 | 3.960527000  | 3.078020000  | 6 | -4.779638000 | 5.645229000  | -0.793864000 |
| 1 | -5.158479000 | 3.614344000  | 3.745015000  | 6 | -5.958070000 | 4.905127000  | -0.839993000 |
| 1 | -4.117316000 | 4.967626000  | 3.379128000  | 6 | -5.914217000 | 3.580502000  | -1.267170000 |
| 1 | -4.764433000 | 4.004009000  | 2.063231000  | 6 | -4.707758000 | 3.003407000  | -1.642936000 |
| 6 | -2.737179000 | 2.893979000  | 4.656754000  | 6 | -3.513679000 | 3.737148000  | -1.605937000 |
| 1 | -2.567567000 | 3.870541000  | 5.099844000  | 6 | -2.241356000 | 3.108960000  | -1.993745000 |
| 1 | -3.523349000 | 2.394359000  | 5.202307000  | 6 | -1.062839000 | 3.340138000  | -1.294260000 |
| 1 | -1.824444000 | 2.314715000  | 4.738575000  | 6 | 0.128953000  | 2.661282000  | -1.580279000 |
| 6 | -6.162429000 | -1.789854000 | 3.917953000  | 6 | 0.204929000  | 1.763377000  | -2.697188000 |
| 1 | -6.543973000 | -1.914420000 | 2.910432000  | 6 | -2.169719000 | 2.217064000  | -3.088248000 |
| 1 | -6.482420000 | -2.642849000 | 4.507249000  | 6 | -1.002783000 | 1.590268000  | -3.444231000 |

|   |              |              |              |    |              |              |              |
|---|--------------|--------------|--------------|----|--------------|--------------|--------------|
| 6 | 1.438132000  | 1.146974000  | -3.058114000 | 15 | -0.810793000 | -1.037352000 | 0.012591000  |
| 6 | 1.512655000  | 0.148487000  | -4.173569000 | 15 | 2.330158000  | 0.536729000  | 0.087551000  |
| 1 | -6.904121000 | 5.359421000  | -0.549766000 | 1  | 0.848779000  | -5.517054000 | -1.373138000 |
| 1 | -4.801611000 | 6.685697000  | -0.472241000 | 1  | -0.684329000 | -3.562021000 | -1.390265000 |
| 1 | -2.661730000 | 5.666463000  | -1.170318000 | 1  | 2.556095000  | 1.101096000  | 5.014662000  |
| 1 | -4.670849000 | 1.953284000  | -1.934613000 | 1  | 2.838628000  | 1.772330000  | 2.636455000  |
| 1 | -6.828070000 | 2.987793000  | -1.300436000 | 6  | 3.292840000  | 2.080922000  | 0.252014000  |
| 1 | -3.068430000 | 2.037555000  | -3.679725000 | 6  | 4.652529000  | 2.121741000  | 0.537307000  |
| 1 | -1.062161000 | 4.056133000  | -0.473018000 | 6  | 2.609870000  | 3.266795000  | 0.092894000  |
| 1 | 1.059606000  | 3.010311000  | -1.139520000 | 6  | 5.344884000  | 3.313471000  | 0.588573000  |
| 1 | -0.995025000 | 0.933545000  | -4.311052000 | 1  | 5.167144000  | 1.205089000  | 0.711707000  |
| 1 | 2.227887000  | 1.116134000  | -2.304304000 | 6  | 3.249783000  | 4.505943000  | 0.154692000  |
| 1 | 1.141860000  | 0.570279000  | -5.121463000 | 1  | 1.557380000  | 3.222144000  | -0.084492000 |
| 1 | 0.939788000  | -0.778306000 | -3.999709000 | 6  | 4.633699000  | 4.497924000  | 0.303276000  |
| 1 | 2.553244000  | -0.134208000 | -4.358001000 | 6  | 3.412293000  | -0.600870000 | -0.832110000 |
| 6 | 2.788776000  | 2.806529000  | -3.736795000 | 6  | 3.112657000  | -0.798920000 | -2.161554000 |
| 8 | 3.582707000  | 2.192609000  | -4.374836000 | 6  | 4.509986000  | -1.257895000 | -0.288835000 |
| 8 | 2.357276000  | 3.794299000  | -3.234078000 | 6  | 3.919162000  | -1.565883000 | -3.000550000 |

### L1-(S)-IM1

|   |              |              |              |   |              |              |              |
|---|--------------|--------------|--------------|---|--------------|--------------|--------------|
| 6 | -0.880020000 | 2.622921000  | -1.647608000 | 1 | 2.224167000  | -0.351130000 | -2.555596000 |
| 8 | -0.639710000 | 2.637433000  | -0.400866000 | 6 | 5.365718000  | -2.002507000 | -1.076433000 |
| 8 | -0.439726000 | 1.709611000  | -2.397776000 | 1 | 4.675231000  | -1.194122000 | 0.763605000  |
| 6 | 1.684948000  | -2.887209000 | 5.283783000  | 6 | 5.101364000  | -2.059132000 | -2.458901000 |
| 1 | 2.704138000  | -3.309633000 | 5.354086000  | 6 | -2.149681000 | -1.643571000 | -1.075735000 |
| 1 | 0.982194000  | -3.419375000 | 5.927099000  | 6 | -3.082867000 | -2.586470000 | -0.673000000 |
| 6 | 0.998401000  | -4.682650000 | -0.693507000 | 6 | -2.219019000 | -1.145566000 | -2.360387000 |
| 6 | 2.015756000  | -4.671476000 | 0.227748000  | 6 | -4.097816000 | -3.009938000 | -1.507975000 |
| 6 | 2.201460000  | -3.593765000 | 1.082004000  | 1 | -3.008049000 | -2.988105000 | 0.311087000  |
| 6 | 1.408124000  | -2.463731000 | 1.076707000  | 6 | -3.210788000 | -1.539781000 | -3.259250000 |
| 6 | 0.311507000  | -2.482471000 | 0.168693000  | 1 | -1.499652000 | -0.414449000 | -2.655091000 |
| 6 | 0.148876000  | -3.569134000 | -0.694774000 | 6 | -4.186090000 | -2.426328000 | -2.789506000 |
| 6 | 1.724858000  | -1.408794000 | 2.073746000  | 6 | -1.588631000 | -0.792971000 | 1.639833000  |
| 6 | 1.640968000  | -1.752614000 | 3.408508000  | 6 | -1.914017000 | 0.507018000  | 1.967203000  |
| 6 | 1.928868000  | -0.880321000 | 4.448880000  | 6 | -1.858472000 | -1.806061000 | 2.550455000  |
| 6 | 2.337725000  | 0.407858000  | 4.207149000  | 6 | -2.564677000 | 0.831150000  | 3.156274000  |
| 6 | 2.482186000  | 0.772016000  | 2.862832000  | 1 | -1.644134000 | 1.286512000  | 1.286838000  |
| 6 | 2.210722000  | -0.098547000 | 1.804019000  | 6 | -2.534138000 | -1.550275000 | 3.727920000  |
|   |              |              |              | 1 | -1.512348000 | -2.793011000 | 2.338154000  |
|   |              |              |              | 6 | -2.959315000 | -0.228840000 | 3.968482000  |

|    |              |              |              |   |              |              |              |
|----|--------------|--------------|--------------|---|--------------|--------------|--------------|
| 8  | 3.297113000  | -3.841606000 | 1.871459000  | 1 | -5.318157000 | -4.958508000 | -3.037777000 |
| 8  | 1.247588000  | -2.956010000 | 3.938478000  | 1 | -4.022175000 | -5.716179000 | -2.120386000 |
| 8  | 2.985281000  | -5.607428000 | 0.466143000  | 6 | -6.490521000 | -3.612273000 | -0.860886000 |
| 8  | 1.717799000  | -1.517717000 | 5.641181000  | 1 | -6.503446000 | -2.768559000 | -0.179155000 |
| 6  | -2.692593000 | -2.654372000 | 4.797776000  | 1 | -6.916089000 | -3.311161000 | -1.800594000 |
| 6  | -2.719189000 | 2.339976000  | 3.478492000  | 1 | -7.114351000 | -4.397089000 | -0.445133000 |
| 6  | -5.049617000 | -4.135705000 | -1.042455000 | 6 | 7.900957000  | -2.427600000 | -0.911564000 |
| 6  | -3.139004000 | -0.987850000 | -4.707109000 | 1 | 8.054661000  | -1.363115000 | -0.766690000 |
| 6  | 6.820358000  | 3.340751000  | 1.049907000  | 1 | 8.647219000  | -2.958417000 | -0.329395000 |
| 6  | 2.343299000  | 5.761136000  | 0.080175000  | 1 | 8.046493000  | -2.675727000 | -1.948379000 |
| 6  | 3.368197000  | -1.846581000 | -4.421098000 | 6 | 6.479398000  | -2.727508000 | 1.103745000  |
| 6  | 6.492105000  | -2.845758000 | -0.437425000 | 1 | 6.715784000  | -1.718965000 | 1.427379000  |
| 29 | 0.292547000  | 0.731315000  | -0.627310000 | 1 | 5.523322000  | -3.015998000 | 1.517111000  |
| 8  | -5.253895000 | -2.822691000 | -3.592001000 | 1 | 7.242040000  | -3.387168000 | 1.503498000  |
| 8  | 6.061953000  | -2.644495000 | -3.283736000 | 6 | 6.245079000  | -4.331015000 | -0.801799000 |
| 6  | 6.901665000  | -1.695593000 | -4.006735000 | 1 | 6.302391000  | -4.464097000 | -1.871310000 |
| 6  | -6.406841000 | -1.957082000 | -3.800658000 | 1 | 6.998381000  | -4.954962000 | -0.329078000 |
| 1  | -6.374785000 | -1.559913000 | -4.800778000 | 1 | 5.266146000  | -4.649781000 | -0.464914000 |
| 1  | -7.286272000 | -2.570758000 | -3.693524000 | 6 | 4.131882000  | -2.919540000 | -5.233473000 |
| 1  | -6.430416000 | -1.151919000 | -3.080352000 | 1 | 5.097670000  | -2.581862000 | -5.569332000 |
| 6  | -3.482436000 | -2.077795000 | -5.750514000 | 1 | 4.268163000  | -3.823758000 | -4.658502000 |
| 1  | -2.760950000 | -2.885411000 | -5.683955000 | 1 | 3.540366000  | -3.151781000 | -6.112447000 |
| 1  | -4.460595000 | -2.496518000 | -5.601988000 | 6 | 3.316702000  | -0.536570000 | -5.239573000 |
| 1  | -3.419708000 | -1.649126000 | -6.745055000 | 1 | 2.712114000  | 0.214059000  | -4.745193000 |
| 6  | -4.050436000 | 0.251257000  | -4.869382000 | 1 | 4.312261000  | -0.131904000 | -5.381101000 |
| 1  | -3.759217000 | 1.023482000  | -4.169630000 | 1 | 2.885321000  | -0.729224000 | -6.216578000 |
| 1  | -3.949409000 | 0.645510000  | -5.875898000 | 6 | 1.925800000  | -2.400979000 | -4.258208000 |
| 1  | -5.090365000 | 0.025775000  | -4.701809000 | 1 | 1.942919000  | -3.312787000 | -3.673313000 |
| 6  | -1.700615000 | -0.515276000 | -5.048046000 | 1 | 1.264192000  | -1.699344000 | -3.771141000 |
| 1  | -1.392513000 | 0.347947000  | -4.473738000 | 1 | 1.513845000  | -2.621664000 | -5.237025000 |
| 1  | -0.985340000 | -1.313741000 | -4.892315000 | 1 | 7.451367000  | -1.072284000 | -3.317989000 |
| 1  | -1.675664000 | -0.240113000 | -6.096897000 | 1 | 6.303445000  | -1.069709000 | -4.649421000 |
| 6  | -4.617540000 | -4.723904000 | 0.322401000  | 1 | 7.580382000  | -2.291721000 | -4.595246000 |
| 1  | -3.609094000 | -5.119607000 | 0.284992000  | 6 | 7.780278000  | 3.853431000  | -0.046200000 |
| 1  | -4.681783000 | -3.992067000 | 1.119984000  | 1 | 7.628921000  | 4.903134000  | -0.227202000 |
| 1  | -5.287035000 | -5.540320000 | 0.568100000  | 1 | 8.806098000  | 3.713266000  | 0.278895000  |
| 6  | -5.022741000 | -5.300879000 | -2.060609000 | 1 | 7.638356000  | 3.301416000  | -0.969302000 |
| 1  | -5.697348000 | -6.086205000 | -1.733716000 | 6 | 7.314006000  | 1.932771000  | 1.456977000  |

|   |              |              |              |   |               |              |              |
|---|--------------|--------------|--------------|---|---------------|--------------|--------------|
| 1 | 6.708398000  | 1.511465000  | 2.250986000  | 1 | -0.945587000  | -1.948521000 | 5.892453000  |
| 1 | 7.320688000  | 1.248648000  | 0.615256000  | 8 | 5.372322000   | 5.675458000  | 0.185781000  |
| 1 | 8.330406000  | 2.018694000  | 1.823768000  | 8 | -3.775207000  | -0.008508000 | 5.078620000  |
| 6 | 6.931785000  | 4.247242000  | 2.299772000  | 6 | 5.645345000   | 6.115972000  | -1.177466000 |
| 1 | 7.961539000  | 4.274810000  | 2.642936000  | 1 | 4.744393000   | 6.463219000  | -1.653732000 |
| 1 | 6.610327000  | 5.249518000  | 2.064213000  | 1 | 6.350147000   | 6.927132000  | -1.088193000 |
| 1 | 6.315149000  | 3.855391000  | 3.101462000  | 1 | 6.070667000   | 5.313746000  | -1.761572000 |
| 6 | 1.864244000  | 5.975669000  | -1.374220000 | 6 | -5.193427000  | 0.162515000  | 4.790272000  |
| 1 | 2.693424000  | 6.179548000  | -2.039379000 | 1 | -5.572898000  | -0.677265000 | 4.226852000  |
| 1 | 1.348825000  | 5.094588000  | -1.737751000 | 1 | -5.683310000  | 0.219055000  | 5.749244000  |
| 1 | 1.179119000  | 6.816776000  | -1.417444000 | 1 | -5.363891000  | 1.069834000  | 4.235830000  |
| 6 | 1.088255000  | 5.524440000  | 0.967684000  | 6 | 3.500647000   | -5.235736000 | 1.732028000  |
| 1 | 0.495948000  | 6.433212000  | 0.983570000  | 1 | 4.568371000   | -5.458193000 | 1.774010000  |
| 1 | 0.458279000  | 4.728387000  | 0.600221000  | 1 | 2.941293000   | -5.764476000 | 2.525357000  |
| 1 | 1.384699000  | 5.294292000  | 1.984886000  | 6 | 2.995363000   | 7.057835000  | 0.616983000  |
| 6 | -1.379006000 | 3.051213000  | 3.134449000  | 1 | 3.407047000   | 6.898359000  | 1.604977000  |
| 1 | -0.557016000 | 2.580450000  | 3.662133000  | 1 | 3.780151000   | 7.432606000  | -0.015327000 |
| 1 | -1.164137000 | 3.042829000  | 2.076484000  | 1 | 2.225620000   | 7.818742000  | 0.684000000  |
| 1 | -1.442963000 | 4.087616000  | 3.448408000  | 6 | -8.355815000  | 3.594093000  | -1.342547000 |
| 6 | -3.828848000 | 2.963482000  | 2.602299000  | 6 | -9.687638000  | 3.384322000  | -1.007752000 |
| 1 | -4.796090000 | 2.525666000  | 2.816527000  | 6 | -10.030149000 | 2.415469000  | -0.069861000 |
| 1 | -3.892508000 | 4.029886000  | 2.794553000  | 6 | -9.027558000  | 1.660531000  | 0.530860000  |
| 1 | -3.616137000 | 2.821519000  | 1.550913000  | 6 | -7.696048000  | 1.873584000  | 0.197410000  |
| 6 | -2.989167000 | 2.651503000  | 4.969989000  | 6 | -7.336365000  | 2.843228000  | -0.746074000 |
| 1 | -2.893210000 | 3.722509000  | 5.110565000  | 6 | -5.921021000  | 3.063496000  | -1.103217000 |
| 1 | -3.973880000 | 2.361617000  | 5.291761000  | 6 | -5.437056000  | 4.344615000  | -1.393872000 |
| 1 | -2.266951000 | 2.154943000  | 5.604584000  | 6 | -4.105036000  | 4.545836000  | -1.725782000 |
| 6 | -4.168988000 | -2.984714000 | 5.107511000  | 6 | -3.205422000  | 3.479813000  | -1.779303000 |
| 1 | -4.708499000 | -3.219522000 | 4.195506000  | 6 | -5.017457000  | 1.998290000  | -1.156557000 |
| 1 | -4.214007000 | -3.851613000 | 5.758862000  | 6 | -3.684064000  | 2.202225000  | -1.487488000 |
| 1 | -4.649743000 | -2.163644000 | 5.609309000  | 6 | -1.770940000  | 3.719263000  | -2.204373000 |
| 6 | -2.019718000 | -3.973211000 | 4.352910000  | 1 | -11.073715000 | 2.250115000  | 0.192401000  |
| 1 | -2.509901000 | -4.395803000 | 3.481648000  | 1 | -10.464335000 | 3.976130000  | -1.489818000 |
| 1 | -0.970948000 | -3.830260000 | 4.134624000  | 1 | -8.098687000  | 4.335014000  | -2.099257000 |
| 1 | -2.109405000 | -4.691913000 | 5.160493000  | 1 | -6.913896000  | 1.298948000  | 0.693312000  |
| 6 | -1.986270000 | -2.175319000 | 6.090497000  | 1 | -9.283795000  | 0.905361000  | 1.272628000  |
| 1 | -2.466695000 | -1.285528000 | 6.466673000  | 1 | -5.362174000  | 0.984228000  | -0.954932000 |
| 1 | -2.038222000 | -2.952418000 | 6.848090000  | 1 | -6.109673000  | 5.199484000  | -1.325446000 |

|   |              |             |              |   |             |              |              |
|---|--------------|-------------|--------------|---|-------------|--------------|--------------|
| 1 | -3.747324000 | 5.555329000 | -1.936270000 | 6 | 3.477416000 | -0.336834000 | -0.934565000 |
| 1 | -3.014271000 | 1.343927000 | -1.518078000 | 6 | 3.224508000 | -0.427389000 | -2.285432000 |
| 6 | -1.669058000 | 3.858560000 | -3.719682000 | 6 | 4.614168000 | -0.954009000 | -0.426481000 |
| 1 | -2.298630000 | 4.685863000 | -4.071678000 | 6 | 4.101280000 | -1.053218000 | -3.169194000 |
| 1 | -2.004448000 | 2.938738000 | -4.211523000 | 1 | 2.320495000 | 0.001339000  | -2.663492000 |
| 1 | -0.635069000 | 4.046899000 | -4.032982000 | 6 | 5.539908000 | -1.559618000 | -1.255047000 |
| 1 | -1.437970000 | 4.655711000 | -1.729767000 | 1 | 4.760976000 | -0.962564000 | 0.630493000  |

**L1-(R)-IM1**

|    |              |              |              |    |              |              |              |
|----|--------------|--------------|--------------|----|--------------|--------------|--------------|
| 6  | 2.090479000  | -2.985166000 | 5.154327000  | 6  | -3.217469000 | -2.426286000 | -0.434856000 |
| 1  | 3.141045000  | -3.327095000 | 5.191622000  | 6  | -1.908688000 | -1.946414000 | -2.365496000 |
| 1  | 1.446347000  | -3.589548000 | 5.795084000  | 6  | -4.285606000 | -2.818838000 | -1.221865000 |
| 6  | 1.363020000  | -4.772825000 | -0.721469000 | 1  | -3.293882000 | -2.481428000 | 0.625718000  |
| 6  | 2.431779000  | -4.651719000 | 0.130941000  | 6  | -2.930272000 | -2.378258000 | -3.208357000 |
| 6  | 2.572955000  | -3.546567000 | 0.959265000  | 1  | -0.980287000 | -1.623497000 | -2.792488000 |
| 6  | 1.690246000  | -2.484864000 | 0.984127000  | 6  | -4.153777000 | -2.689985000 | -2.613840000 |
| 6  | 0.554934000  | -2.614650000 | 0.134510000  | 6  | -1.402188000 | -1.101697000 | 1.703140000  |
| 6  | 0.423755000  | -3.735226000 | -0.688165000 | 6  | -1.760396000 | 0.177799000  | 2.069199000  |
| 6  | 1.942994000  | -1.417431000 | 1.989424000  | 6  | -1.603980000 | -2.146966000 | 2.594972000  |
| 6  | 1.914709000  | -1.803542000 | 3.315891000  | 6  | -2.400058000 | 0.451522000  | 3.276276000  |
| 6  | 2.155951000  | -0.941921000 | 4.376822000  | 1  | -1.518372000 | 0.971703000  | 1.396227000  |
| 6  | 2.457456000  | 0.381203000  | 4.167184000  | 6  | -2.248322000 | -1.939058000 | 3.798113000  |
| 6  | 2.538694000  | 0.795541000  | 2.832689000  | 1  | -1.233920000 | -3.115975000 | 2.343041000  |
| 6  | 2.309861000  | -0.061483000 | 1.752099000  | 6  | -2.729417000 | -0.641609000 | 4.072313000  |
| 15 | -0.684931000 | -1.271057000 | 0.043531000  | 8  | 3.719749000  | -3.694145000 | 1.696988000  |
| 15 | 2.323815000  | 0.656029000  | 0.064015000  | 8  | 1.629868000  | -3.049555000 | 3.816172000  |
| 1  | 1.241169000  | -5.636139000 | -1.369568000 | 8  | 3.487698000  | -5.498361000 | 0.325652000  |
| 1  | -0.453090000 | -3.818489000 | -1.322445000 | 8  | 2.023443000  | -1.628207000 | 5.552392000  |
| 1  | 2.642389000  | 1.065158000  | 4.990717000  | 6  | -2.311363000 | -3.060206000 | 4.859479000  |
| 1  | 2.809235000  | 1.827432000  | 2.628985000  | 6  | -2.617240000 | 1.944917000  | 3.626806000  |
| 6  | 3.157457000  | 2.271074000  | 0.245206000  | 6  | -5.528297000 | -3.479122000 | -0.582479000 |
| 6  | 4.538162000  | 2.390901000  | 0.345170000  | 6  | -2.583232000 | -2.547780000 | -4.710400000 |
| 6  | 2.378387000  | 3.411814000  | 0.283908000  | 6  | 6.677714000  | 3.724362000  | 0.637614000  |
| 6  | 5.153318000  | 3.623363000  | 0.402778000  | 6  | 1.975102000  | 5.885972000  | 0.548398000  |
| 1  | 5.130096000  | 1.505399000  | 0.360277000  | 6  | 3.623892000  | -1.211473000 | -4.635285000 |
| 6  | 2.944200000  | 4.686585000  | 0.371707000  | 6  | 6.721380000  | -2.360042000 | -0.659340000 |
| 1  | 1.314907000  | 3.307279000  | 0.238205000  | 29 | 0.170357000  | 0.683924000  | -0.343674000 |
| 6  | 4.335304000  | 4.768769000  | 0.325824000  | 8  | -5.286327000 | -2.885929000 | -3.398093000 |

|   |              |              |              |   |             |              |              |
|---|--------------|--------------|--------------|---|-------------|--------------|--------------|
| 8 | 6.309454000  | -1.983833000 | -3.487536000 | 6 | 6.554616000 | -3.838780000 | -1.088768000 |
| 6 | 7.122836000  | -0.946596000 | -4.113797000 | 1 | 6.591922000 | -3.917025000 | -2.165170000 |
| 6 | -5.925772000 | -1.654734000 | -3.864082000 | 1 | 7.357259000 | -4.436726000 | -0.666305000 |
| 1 | -5.264410000 | -1.108107000 | -4.516482000 | 1 | 5.607341000 | -4.234725000 | -0.742442000 |
| 1 | -6.805808000 | -1.967907000 | -4.401664000 | 6 | 4.411749000 | -2.249456000 | -5.471418000 |
| 1 | -6.194495000 | -1.025292000 | -3.030663000 | 1 | 5.405875000 | -1.922756000 | -5.719343000 |
| 6 | -3.648505000 | -3.276254000 | -5.565423000 | 1 | 4.486695000 | -3.192422000 | -4.947941000 |
| 1 | -3.952819000 | -4.205750000 | -5.107292000 | 1 | 3.873377000 | -2.409293000 | -6.399170000 |
| 1 | -4.527437000 | -2.679552000 | -5.738141000 | 6 | 3.649268000 | 0.156272000  | -5.354594000 |
| 1 | -3.202795000 | -3.493914000 | -6.529901000 | 1 | 3.044566000 | 0.884578000  | -4.827007000 |
| 6 | -2.282622000 | -1.175312000 | -5.351892000 | 1 | 4.658228000 | 0.542932000  | -5.421802000 |
| 1 | -1.470721000 | -0.669719000 | -4.843888000 | 1 | 3.257583000 | 0.052398000  | -6.361469000 |
| 1 | -2.001034000 | -1.308095000 | -6.391368000 | 6 | 2.159889000 | -1.730356000 | -4.613871000 |
| 1 | -3.154985000 | -0.533933000 | -5.314678000 | 1 | 2.099802000 | -2.655448000 | -4.052770000 |
| 6 | -1.313290000 | -3.438432000 | -4.795135000 | 1 | 1.474579000 | -1.016728000 | -4.177048000 |
| 1 | -0.466062000 | -2.998887000 | -4.290426000 | 1 | 1.831887000 | -1.916907000 | -5.630033000 |
| 1 | -1.511380000 | -4.409983000 | -4.356385000 | 1 | 7.570104000 | -0.309145000 | -3.366707000 |
| 1 | -1.042417000 | -3.581144000 | -5.835468000 | 1 | 6.527304000 | -0.346348000 | -4.781590000 |
| 6 | -5.353933000 | -3.657038000 | 0.943336000  | 1 | 7.887678000 | -1.467346000 | -4.667093000 |
| 1 | -4.481779000 | -4.255493000 | 1.179407000  | 6 | 7.415508000 | 4.376512000  | -0.552347000 |
| 1 | -5.275156000 | -2.704060000 | 1.454923000  | 1 | 7.162009000 | 5.418548000  | -0.634711000 |
| 1 | -6.226000000 | -4.172314000 | 1.329283000  | 1 | 8.487365000 | 4.301503000  | -0.398845000 |
| 6 | -5.704854000 | -4.889081000 | -1.197092000 | 1 | 7.168068000 | 3.870018000  | -1.479431000 |
| 1 | -6.567429000 | -5.376516000 | -0.753584000 | 6 | 7.313628000 | 2.330771000  | 0.851160000  |
| 1 | -5.851186000 | -4.816361000 | -2.263583000 | 1 | 6.866342000 | 1.813560000  | 1.692233000  |
| 1 | -4.829029000 | -5.497047000 | -0.997811000 | 1 | 7.228349000 | 1.707883000  | -0.032630000 |
| 6 | -6.818836000 | -2.659886000 | -0.800120000 | 1 | 8.368107000 | 2.464083000  | 1.064561000  |
| 1 | -6.686377000 | -1.638066000 | -0.462807000 | 6 | 6.934445000 | 4.546782000  | 1.923511000  |
| 1 | -7.103668000 | -2.661946000 | -1.837721000 | 1 | 8.002622000 | 4.624538000  | 2.102806000  |
| 1 | -7.626710000 | -3.102927000 | -0.227105000 | 1 | 6.518234000 | 5.536323000  | 1.823396000  |
| 6 | 8.103376000  | -1.846057000 | -1.120195000 | 1 | 6.480030000 | 4.055139000  | 2.777003000  |
| 1 | 8.197387000  | -0.780450000 | -0.939232000 | 6 | 1.332622000 | 6.275900000  | -0.805614000 |
| 1 | 8.877557000  | -2.352150000 | -0.553093000 | 1 | 2.077804000 | 6.473085000  | -1.565632000 |
| 1 | 8.264478000  | -2.052512000 | -2.163188000 | 1 | 0.667343000 | 5.494715000  | -1.147967000 |
| 6 | 6.720674000  | -2.306079000 | 0.885433000  | 1 | 0.735309000 | 7.173143000  | -0.674256000 |
| 1 | 6.887465000  | -1.296135000 | 1.245919000  | 6 | 0.814575000 | 5.466726000  | 1.494931000  |
| 1 | 5.796809000  | -2.681294000 | 1.299989000  | 1 | 0.228249000 | 6.347640000  | 1.732182000  |
| 1 | 7.535797000  | -2.922979000 | 1.248195000  | 1 | 0.146522000 | 4.759138000  | 1.029446000  |





|    |              |              |              |                            |              |              |              |
|----|--------------|--------------|--------------|----------------------------|--------------|--------------|--------------|
| 1  | -1.666791000 | 2.987715000  | -4.441952000 | 6                          | 4.120993000  | 3.974690000  | 1.712125000  |
| 6  | 3.585218000  | -0.261812000 | -1.660665000 | 1                          | 2.661306000  | 3.766761000  | 0.182352000  |
| 6  | 2.726430000  | -0.872164000 | -2.539732000 | 6                          | 3.961755000  | 2.430129000  | 3.538614000  |
| 6  | 1.350980000  | -0.748815000 | -2.407190000 | 1                          | 2.341754000  | 1.037043000  | 3.428158000  |
| 6  | 0.742675000  | -0.037451000 | -1.394990000 | 6                          | 4.592519000  | 3.494722000  | 2.925558000  |
| 6  | 1.617003000  | 0.634822000  | -0.494366000 | 6                          | -0.083386000 | 2.859520000  | 0.392893000  |
| 6  | 2.998629000  | 0.494886000  | -0.637657000 | 6                          | -0.946668000 | 3.446293000  | 1.314828000  |
| 6  | -0.742675000 | 0.037451000  | -1.394990000 | 6                          | 0.000000000  | 3.391459000  | -0.887160000 |
| 6  | -1.350980000 | 0.748815000  | -2.407190000 | 6                          | -1.708609000 | 4.544509000  | 0.962383000  |
| 6  | -2.726430000 | 0.872164000  | -2.539732000 | 1                          | -1.017044000 | 3.046526000  | 2.308567000  |
| 6  | -3.585218000 | 0.261812000  | -1.660665000 | 6                          | -0.765391000 | 4.490277000  | -1.238039000 |
| 6  | -2.998629000 | -0.494886000 | -0.637657000 | 1                          | 0.633101000  | 2.936490000  | -1.620731000 |
| 6  | -1.617003000 | -0.634822000 | -0.494366000 | 6                          | -1.617791000 | 5.069206000  | -0.315248000 |
| 15 | 0.933243000  | 1.465005000  | 0.988169000  | 8                          | 0.736036000  | -1.481795000 | -3.385176000 |
| 15 | -0.933243000 | -1.465005000 | 0.988169000  | 8                          | -0.736036000 | 1.481795000  | -3.385176000 |
| 1  | 4.663121000  | -0.362928000 | -1.751084000 | 8                          | 3.013820000  | -1.670557000 | -3.606612000 |
| 1  | 3.651791000  | 0.998453000  | 0.067524000  | 8                          | -3.013820000 | 1.670557000  | -3.606612000 |
| 1  | -4.663121000 | 0.362928000  | -1.751084000 | 29                         | 0.000000000  | 0.000000000  | 2.307825000  |
| 1  | -3.651791000 | -0.998453000 | 0.067524000  | 6                          | 1.773872000  | -1.913953000 | -4.248192000 |
| 6  | -2.393086000 | -2.298348000 | 1.715905000  | 1                          | 1.666791000  | -2.987715000 | -4.441952000 |
| 6  | -3.027263000 | -3.382479000 | 1.113395000  | 1                          | 1.729583000  | -1.344843000 | -5.191583000 |
| 6  | -2.861256000 | -1.837220000 | 2.939066000  | 1                          | 0.000000000  | 0.000000000  | 3.877017000  |
| 6  | -4.120993000 | -3.974690000 | 1.712125000  | 1                          | -4.601323000 | -4.809851000 | 1.241972000  |
| 1  | -2.661306000 | -3.766761000 | 0.182352000  | 1                          | -5.440104000 | -3.957889000 | 3.390985000  |
| 6  | -3.961755000 | -2.430129000 | 3.538614000  | 1                          | -4.311333000 | -2.065694000 | 4.483843000  |
| 1  | -2.341754000 | -1.037043000 | 3.428158000  | 1                          | 0.693820000  | -4.892953000 | -2.229223000 |
| 6  | -4.592519000 | -3.494722000 | 2.925558000  | 1                          | 2.209423000  | -5.920095000 | -0.589372000 |
| 6  | 0.083386000  | -2.859520000 | 0.392893000  | 1                          | 2.368841000  | -4.987248000 | 1.681173000  |
| 6  | 0.946668000  | -3.446293000 | 1.314828000  | 1                          | -2.368841000 | 4.987248000  | 1.681173000  |
| 6  | 0.000000000  | -3.391459000 | -0.887160000 | 1                          | -0.693820000 | 4.892953000  | -2.229223000 |
| 6  | 1.708609000  | -4.544509000 | 0.962383000  | 1                          | -2.209423000 | 5.920095000  | -0.589372000 |
| 1  | 1.017044000  | -3.046526000 | 2.308567000  | 1                          | 4.311333000  | 2.065694000  | 4.483843000  |
| 6  | 0.765391000  | -4.490277000 | -1.238039000 | 1                          | 5.440104000  | 3.957889000  | 3.390985000  |
| 1  | -0.633101000 | -2.936490000 | -1.620731000 | 1                          | 4.601323000  | 4.809851000  | 1.241972000  |
| 6  | 1.617791000  | -5.069206000 | -0.315248000 |                            |              |              |              |
| 6  | 2.393086000  | 2.298348000  | 1.715905000  |                            |              |              |              |
| 6  | 3.027263000  | 3.382479000  | 1.113395000  |                            |              |              |              |
| 6  | 2.861256000  | 1.837220000  | 2.939066000  |                            |              |              |              |
|    |              |              |              | <b>L2-TS1<sub>sj</sub></b> |              |              |              |
|    |              |              |              | 6                          | 2.067213000  | -2.479243000 | 4.430156000  |
|    |              |              |              | 1                          | 2.872554000  | -3.076527000 | 4.874378000  |

|    |              |              |              |    |               |              |              |
|----|--------------|--------------|--------------|----|---------------|--------------|--------------|
| 1  | 1.083445000  | -2.915470000 | 4.661054000  | 6  | -2.793065000  | -4.069740000 | -2.295523000 |
| 6  | 3.030612000  | -3.468455000 | -1.669052000 | 1  | -2.203355000  | -3.458502000 | -0.347999000 |
| 6  | 3.961184000  | -2.950794000 | -0.803974000 | 6  | -1.817690000  | -2.863824000 | -4.116940000 |
| 6  | 3.613178000  | -2.000020000 | 0.147316000  | 1  | -0.472393000  | -1.301376000 | -3.581806000 |
| 6  | 2.339416000  | -1.487315000 | 0.281512000  | 6  | -2.660853000  | -3.860674000 | -3.655275000 |
| 6  | 1.365699000  | -2.000140000 | -0.620267000 | 6  | -1.051567000  | -1.509525000 | 0.920041000  |
| 6  | 1.726692000  | -2.966603000 | -1.558486000 | 6  | -1.982821000  | -0.594222000 | 1.396616000  |
| 6  | 2.101096000  | -0.561496000 | 1.422719000  | 6  | -0.782861000  | -2.654766000 | 1.665277000  |
| 6  | 2.121196000  | -1.101622000 | 2.691634000  | 6  | -2.646327000  | -0.827602000 | 2.589983000  |
| 6  | 2.051164000  | -0.340549000 | 3.849956000  | 1  | -2.199868000  | 0.292217000  | 0.836785000  |
| 6  | 1.971295000  | 1.028273000  | 3.801440000  | 6  | -1.448295000  | -2.886053000 | 2.854847000  |
| 6  | 1.944874000  | 1.607306000  | 2.525760000  | 1  | -0.045737000  | -3.354187000 | 1.325088000  |
| 6  | 1.996778000  | 0.854400000  | 1.352784000  | 6  | -2.383100000  | -1.972987000 | 3.317339000  |
| 15 | -0.279421000 | -1.192979000 | -0.709674000 | 8  | 4.705678000   | -1.713271000 | 0.915086000  |
| 15 | 1.876268000  | 1.634372000  | -0.305312000 | 8  | 2.241508000   | -2.420220000 | 3.024776000  |
| 1  | 3.290775000  | -4.226974000 | -2.402266000 | 8  | 5.279677000   | -3.270249000 | -0.665214000 |
| 1  | 0.971860000  | -3.343824000 | -2.241156000 | 8  | 2.125828000   | -1.155656000 | 4.938512000  |
| 1  | 1.933443000  | 1.631336000  | 4.704407000  | 29 | 0.170188000   | 0.840329000  | -1.482227000 |
| 1  | 1.873676000  | 2.687639000  | 2.457031000  | 6  | 5.798681000   | -2.295412000 | 0.226672000  |
| 6  | 1.729365000  | 3.427646000  | 0.087519000  | 1  | 6.324768000   | -1.516062000 | -0.347347000 |
| 6  | 2.708345000  | 4.358370000  | -0.228036000 | 1  | 6.467778000   | -2.779585000 | 0.945854000  |
| 6  | 0.541066000  | 3.874722000  | 0.669803000  | 6  | -7.498151000  | 1.695445000  | 0.601848000  |
| 6  | 2.510259000  | 5.705958000  | 0.035782000  | 6  | -8.736567000  | 1.328849000  | 1.112855000  |
| 1  | 3.624567000  | 4.040682000  | -0.679084000 | 6  | -9.077056000  | -0.015021000 | 1.232616000  |
| 6  | 0.351896000  | 5.213705000  | 0.944112000  | 6  | -8.162613000  | -0.986806000 | 0.837802000  |
| 1  | -0.229963000 | 3.168200000  | 0.906751000  | 6  | -6.922365000  | -0.618848000 | 0.332428000  |
| 6  | 1.337687000  | 6.135145000  | 0.623780000  | 6  | -6.565221000  | 0.729711000  | 0.202129000  |
| 6  | 3.584208000  | 1.467337000  | -0.959919000 | 6  | -5.248912000  | 1.116717000  | -0.334168000 |
| 6  | 3.763610000  | 1.209897000  | -2.312998000 | 6  | -4.568515000  | 2.244813000  | 0.139047000  |
| 6  | 4.703046000  | 1.613841000  | -0.143667000 | 6  | -3.319890000  | 2.591772000  | -0.351991000 |
| 6  | 5.039032000  | 1.116158000  | -2.846330000 | 6  | -2.676504000  | 1.836001000  | -1.348468000 |
| 1  | 2.905812000  | 1.069479000  | -2.940320000 | 6  | -4.618433000  | 0.367257000  | -1.337798000 |
| 6  | 5.974973000  | 1.523655000  | -0.676953000 | 6  | -3.374787000  | 0.715393000  | -1.834941000 |
| 1  | 4.578615000  | 1.790383000  | 0.905700000  | 6  | -1.348376000  | 2.226571000  | -1.800488000 |
| 6  | 6.143983000  | 1.276894000  | -2.031365000 | 6  | -0.765431000  | 1.803400000  | -3.029839000 |
| 6  | -1.230146000 | -2.291238000 | -1.847737000 | 1  | -10.048859000 | -0.302958000 | 1.630229000  |
| 6  | -2.082417000 | -3.290995000 | -1.396932000 | 1  | -9.446635000  | 2.100137000  | 1.408684000  |
| 6  | -1.113373000 | -2.080726000 | -3.221646000 | 1  | -7.255251000  | 2.750942000  | 0.480457000  |

|                            |              |              |              |    |              |              |              |
|----------------------------|--------------|--------------|--------------|----|--------------|--------------|--------------|
| 1                          | -6.200342000 | -1.387430000 | 0.057118000  | 1  | -6.055757000 | 0.467420000  | -2.233534000 |
| 1                          | -8.412883000 | -2.042604000 | 0.934143000  | 1  | -4.148976000 | 2.018330000  | -1.846210000 |
| 1                          | -5.126453000 | -0.503825000 | -1.752105000 | 1  | -0.061366000 | -2.164015000 | 4.377887000  |
| 1                          | -5.016957000 | 2.847474000  | 0.930003000  | 1  | 0.907098000  | -2.245168000 | 2.095813000  |
| 1                          | -2.814651000 | 3.475807000  | 0.040791000  | 29 | 0.148957000  | 0.702685000  | -1.284911000 |
| 1                          | -2.923436000 | 0.086546000  | -2.601184000 | 8  | -2.667703000 | -1.194414000 | 4.761017000  |
| 1                          | -0.994077000 | 3.183211000  | -1.416665000 | 8  | -3.865482000 | -0.503173000 | 2.930806000  |
| 1                          | -1.361021000 | 1.190762000  | -3.708988000 | 8  | -4.400063000 | -2.585803000 | 0.460534000  |
| 1                          | 0.499588000  | 0.635614000  | -3.026459000 | 8  | -6.111916000 | -2.030610000 | -0.960953000 |
| 1                          | -0.125099000 | 2.516310000  | -3.547378000 | 6  | 5.158200000  | 0.398330000  | -1.413287000 |
| 1                          | 3.275087000  | 6.412567000  | -0.218702000 | 6  | 3.861589000  | 0.757708000  | -1.735757000 |
| 1                          | 1.186493000  | 7.176284000  | 0.828885000  | 6  | 5.781012000  | 0.857734000  | -0.244781000 |
| 1                          | -0.562336000 | 5.540768000  | 1.398479000  | 6  | 3.109802000  | 1.613022000  | -0.911761000 |
| 1                          | 5.165058000  | 0.916119000  | -3.891666000 | 6  | 3.737843000  | 2.069362000  | 0.259969000  |
| 1                          | 7.131011000  | 1.209348000  | -2.444990000 | 6  | 5.033527000  | 1.703083000  | 0.585180000  |
| 1                          | 6.829955000  | 1.645994000  | -0.041547000 | 6  | 1.190809000  | 1.945943000  | -2.523511000 |
| 1                          | -1.243845000 | -3.777006000 | 3.415851000  | 1  | 3.416088000  | 0.356200000  | -2.645991000 |
| 1                          | -2.901604000 | -2.155519000 | 4.237879000  | 1  | 5.713269000  | -0.246080000 | -2.095102000 |
| 1                          | -3.370843000 | -0.119159000 | 2.937908000  | 1  | 5.472007000  | 2.063413000  | 1.516470000  |
| 1                          | -3.448875000 | -4.835019000 | -1.930132000 | 1  | 3.184957000  | 2.736106000  | 0.924312000  |
| 1                          | -3.212588000 | -4.463091000 | -4.349465000 | 1  | 0.536526000  | 2.747671000  | -2.859231000 |
| 1                          | -1.714371000 | -2.691339000 | -5.169991000 | 1  | 1.788980000  | 1.507519000  | -3.321626000 |
| <b>L2-TS1<sub>re</sub></b> |              |              |              | 6  | 1.755015000  | 2.048988000  | -1.223451000 |
| 6                          | -5.230834000 | 0.189973000  | -1.583038000 | 1  | 1.393451000  | 2.881680000  | -0.615867000 |
| 6                          | -5.192144000 | -1.024137000 | -0.945026000 | 6  | 7.157166000  | 0.460286000  | 0.101856000  |
| 6                          | -4.151153000 | -1.360527000 | -0.088998000 | 6  | 8.014815000  | 1.338742000  | 0.776934000  |
| 6                          | -3.080120000 | -0.530684000 | 0.167994000  | 6  | 7.649195000  | -0.809731000 | -0.228692000 |
| 6                          | -3.091667000 | 0.720938000  | -0.507882000 | 6  | 9.308865000  | 0.962855000  | 1.112097000  |
| 6                          | -4.152949000 | 1.054144000  | -1.347882000 | 1  | 7.666490000  | 2.343407000  | 1.015260000  |
| 6                          | -2.130023000 | -0.934124000 | 1.242083000  | 6  | 8.945399000  | -1.184862000 | 0.101078000  |
| 6                          | -2.622042000 | -0.904262000 | 2.532154000  | 1  | 6.992770000  | -1.519836000 | -0.731829000 |
| 6                          | -1.901075000 | -1.322559000 | 3.641832000  | 6  | 9.782588000  | -0.301632000 | 0.775483000  |
| 6                          | -0.628663000 | -1.819194000 | 3.517784000  | 1  | 9.957163000  | 1.668185000  | 1.630378000  |
| 6                          | -0.099813000 | -1.862761000 | 2.221522000  | 1  | 9.301589000  | -2.179692000 | -0.163507000 |
| 6                          | -0.805368000 | -1.434473000 | 1.096152000  | 1  | 10.797982000 | -0.595984000 | 1.035466000  |
| 15                         | -1.594429000 | 1.763791000  | -0.369631000 | 6  | 1.570480000  | -2.336088000 | -0.237306000 |
| 15                         | 0.025010000  | -1.383144000 | -0.547475000 | 6  | 2.645420000  | -1.661712000 | 0.336142000  |
|                            |              |              |              | 6  | 1.708615000  | -3.687950000 | -0.532102000 |

|   |              |              |              |
|---|--------------|--------------|--------------|
| 6 | 3.818230000  | -2.330468000 | 0.636592000  |
| 1 | 2.572075000  | -0.613537000 | 0.541169000  |
| 6 | 2.887843000  | -4.352774000 | -0.244388000 |
| 1 | 0.903021000  | -4.222895000 | -0.987388000 |
| 6 | 3.940618000  | -3.678090000 | 0.347175000  |
| 6 | -0.983034000 | -2.548229000 | -1.551167000 |
| 6 | -1.080998000 | -2.352902000 | -2.923080000 |
| 6 | -1.602190000 | -3.658131000 | -0.981195000 |
| 6 | -1.770269000 | -3.257287000 | -3.714206000 |
| 1 | -0.630839000 | -1.487132000 | -3.364993000 |
| 6 | -2.284199000 | -4.563336000 | -1.773132000 |
| 1 | -1.559427000 | -3.809139000 | 0.078183000  |
| 6 | -2.367696000 | -4.364743000 | -3.142236000 |
| 6 | -2.019755000 | 3.311525000  | -1.273848000 |
| 6 | -2.170226000 | 4.542582000  | -0.649534000 |
| 6 | -2.110586000 | 3.252850000  | -2.666704000 |
| 6 | -2.420278000 | 5.685197000  | -1.393906000 |
| 1 | -2.090688000 | 4.617964000  | 0.413901000  |
| 6 | -2.371729000 | 4.390284000  | -3.404490000 |
| 1 | -1.967247000 | 2.314515000  | -3.165028000 |
| 6 | -2.526888000 | 5.611870000  | -2.768514000 |
| 6 | -1.566710000 | 2.271897000  | 1.390467000  |
| 6 | -2.714413000 | 2.694632000  | 2.056517000  |
| 6 | -0.361472000 | 2.235207000  | 2.080290000  |
| 6 | -2.650192000 | 3.099917000  | 3.376030000  |
| 1 | -3.655523000 | 2.700934000  | 1.543212000  |
| 6 | -0.299105000 | 2.632574000  | 3.406080000  |
| 1 | 0.522077000  | 1.882013000  | 1.586570000  |
| 6 | -1.439631000 | 3.070523000  | 4.052180000  |
| 6 | -3.817607000 | -0.473481000 | 4.345939000  |
| 1 | -4.715050000 | -0.953229000 | 4.752929000  |
| 1 | -3.737504000 | 0.569877000  | 4.688539000  |
| 6 | -5.495205000 | -3.106788000 | -0.272361000 |
| 1 | -6.215864000 | -3.558579000 | 0.418219000  |
| 1 | -5.128316000 | -3.845272000 | -1.002574000 |
| 1 | -0.089070000 | 0.733450000  | -2.851153000 |
| 1 | 2.980126000  | -5.394499000 | -0.480342000 |
| 1 | 4.851822000  | -4.195419000 | 0.574599000  |

|   |              |              |              |
|---|--------------|--------------|--------------|
| 1 | -1.838719000 | -3.094048000 | -4.771291000 |
| 1 | -2.896388000 | -5.067586000 | -3.755633000 |
| 1 | -2.745544000 | -5.421062000 | -1.324193000 |
| 1 | 4.634128000  | -1.792830000 | 1.074791000  |
| 1 | -2.443718000 | 4.326489000  | -4.472146000 |
| 1 | -2.721380000 | 6.496021000  | -3.342446000 |
| 1 | -2.529872000 | 6.627566000  | -0.894931000 |
| 1 | 0.635362000  | 2.595767000  | 3.929421000  |
| 1 | -3.537193000 | 3.437151000  | 3.875490000  |
| 1 | -1.389658000 | 3.383318000  | 5.076448000  |

### L1-(S)-IM1

|    |              |              |              |
|----|--------------|--------------|--------------|
| 6  | -0.702831000 | -2.328489000 | -4.512230000 |
| 1  | -1.247051000 | -2.953046000 | -5.228477000 |
| 1  | 0.311204000  | -2.716566000 | -4.330215000 |
| 6  | -3.448229000 | -3.373374000 | 1.052476000  |
| 6  | -4.075985000 | -2.912649000 | -0.077551000 |
| 6  | -3.477924000 | -1.966187000 | -0.896721000 |
| 6  | -2.244304000 | -1.405855000 | -0.644878000 |
| 6  | -1.575537000 | -1.873989000 | 0.519249000  |
| 6  | -2.182475000 | -2.837251000 | 1.326183000  |
| 6  | -1.695258000 | -0.463357000 | -1.655620000 |
| 6  | -1.341918000 | -0.981270000 | -2.884307000 |
| 6  | -0.864659000 | -0.205762000 | -3.933979000 |
| 6  | -0.737949000 | 1.155522000  | -3.817527000 |
| 6  | -1.105622000 | 1.714499000  | -2.586918000 |
| 6  | -1.587580000 | 0.950003000  | -1.521862000 |
| 15 | 0.066805000  | -1.155136000 | 0.927163000  |
| 15 | -1.728672000 | 1.735888000  | 0.122154000  |
| 1  | -3.906627000 | -4.115442000 | 1.700283000  |
| 1  | -1.656679000 | -3.192851000 | 2.205982000  |
| 1  | -0.369774000 | 1.767345000  | -4.636337000 |
| 1  | -1.011128000 | 2.788791000  | -2.461958000 |
| 6  | -1.830939000 | 3.523760000  | -0.273567000 |
| 6  | -2.941513000 | 4.093247000  | -0.892722000 |
| 6  | -0.766968000 | 4.342848000  | 0.077893000  |
| 6  | -2.975566000 | 5.445882000  | -1.166376000 |
| 1  | -3.781378000 | 3.481632000  | -1.153229000 |

|    |              |              |              |   |              |              |              |
|----|--------------|--------------|--------------|---|--------------|--------------|--------------|
| 6  | -0.799366000 | 5.701181000  | -0.196990000 | 6 | 7.741620000  | -0.911483000 | -1.157658000 |
| 1  | 0.076854000  | 3.918056000  | 0.579134000  | 6 | 6.582099000  | -0.598753000 | -0.459355000 |
| 6  | -1.901459000 | 6.252416000  | -0.820341000 | 6 | 6.134353000  | 0.725778000  | -0.351354000 |
| 6  | -3.398625000 | 1.389204000  | 0.778524000  | 6 | 4.904162000  | 1.054946000  | 0.387980000  |
| 6  | -3.590489000 | 1.588679000  | 2.143144000  | 6 | 4.068495000  | 2.108172000  | -0.009870000 |
| 6  | -4.478443000 | 1.002501000  | -0.005016000 | 6 | 2.906098000  | 2.406481000  | 0.680009000  |
| 6  | -4.838559000 | 1.410575000  | 2.710856000  | 6 | 2.492767000  | 1.679208000  | 1.818799000  |
| 1  | -2.765256000 | 1.888919000  | 2.761102000  | 6 | 4.506229000  | 0.326096000  | 1.517837000  |
| 6  | -5.726084000 | 0.822301000  | 0.566144000  | 6 | 3.346159000  | 0.625519000  | 2.212821000  |
| 1  | -4.347641000 | 0.809754000  | -1.050326000 | 6 | 1.241201000  | 2.009456000  | 2.509955000  |
| 6  | -5.909192000 | 1.028374000  | 1.921790000  | 6 | 1.178593000  | 1.640898000  | 3.980902000  |
| 6  | 0.551800000  | -2.101483000 | 2.426438000  | 1 | 9.390966000  | -0.153524000 | -2.323958000 |
| 6  | 1.546649000  | -3.067815000 | 2.432279000  | 1 | 8.626877000  | 2.207708000  | -2.150271000 |
| 6  | -0.078615000 | -1.780616000 | 3.629118000  | 1 | 6.588110000  | 2.764099000  | -0.880765000 |
| 6  | 1.899065000  | -3.707798000 | 3.610734000  | 1 | 5.991003000  | -1.396092000 | -0.009312000 |
| 1  | 2.052741000  | -3.319798000 | 1.524407000  | 1 | 8.063489000  | -1.949958000 | -1.227889000 |
| 6  | 0.264179000  | -2.427045000 | 4.799637000  | 1 | 5.144335000  | -0.480725000 | 1.880695000  |
| 1  | -0.838125000 | -1.022224000 | 3.649607000  | 1 | 4.326699000  | 2.692765000  | -0.894183000 |
| 6  | 1.257917000  | -3.393355000 | 4.792682000  | 1 | 2.286276000  | 3.238127000  | 0.338711000  |
| 6  | 1.139488000  | -1.806662000 | -0.401768000 | 1 | 3.084730000  | 0.028480000  | 3.086400000  |
| 6  | 2.182387000  | -1.023796000 | -0.880514000 | 1 | 1.049972000  | 3.086922000  | 2.396985000  |
| 6  | 0.959764000  | -3.087576000 | -0.920946000 | 1 | 2.012468000  | 2.074781000  | 4.564239000  |
| 6  | 3.039023000  | -1.516357000 | -1.853199000 | 1 | 1.206689000  | 0.557447000  | 4.150484000  |
| 1  | 2.344083000  | -0.037873000 | -0.497403000 | 1 | 0.243765000  | 2.001797000  | 4.433323000  |
| 6  | 1.816503000  | -3.578894000 | -1.886705000 | 1 | 3.529443000  | -3.174796000 | -3.097892000 |
| 1  | 0.149123000  | -3.695927000 | -0.573689000 | 1 | 3.847941000  | -0.906062000 | -2.199609000 |
| 6  | 2.859768000  | -2.791910000 | -2.352991000 | 1 | 1.675788000  | -4.570360000 | -2.270411000 |
| 8  | -4.335491000 | -1.649282000 | -1.916014000 | 1 | 2.674031000  | -4.448263000 | 3.599577000  |
| 8  | -1.414938000 | -2.283972000 | -3.287013000 | 1 | 1.531457000  | -3.888448000 | 5.703116000  |
| 8  | -5.306794000 | -3.230978000 | -0.571740000 | 1 | -0.231272000 | -2.170847000 | 5.714877000  |
| 8  | -0.618752000 | -1.002449000 | -5.011667000 | 1 | -1.930772000 | 7.303166000  | -1.030792000 |
| 29 | -0.020254000 | 1.030996000  | 1.300672000  | 1 | -3.835793000 | 5.872968000  | -1.642461000 |
| 6  | -5.353886000 | -2.631820000 | -1.856185000 | 1 | 0.029710000  | 6.320137000  | 0.082647000  |
| 1  | -6.330241000 | -2.158276000 | -2.003929000 | 1 | -6.876838000 | 0.887953000  | 2.361024000  |
| 1  | -5.171087000 | -3.399655000 | -2.626854000 | 1 | -4.973755000 | 1.570070000  | 3.762068000  |
| 6  | 6.895872000  | 1.723089000  | -0.976548000 | 1 | -6.551862000 | 0.519260000  | -0.046667000 |
| 6  | 8.051186000  | 1.410817000  | -1.680972000 |   |              |              |              |
| 6  | 8.483047000  | 0.091064000  | -1.775076000 |   |              |              |              |

**L1-(R)-IM1**

|    |              |              |              |    |              |              |              |
|----|--------------|--------------|--------------|----|--------------|--------------|--------------|
| 6  | 6.039200000  | -0.816267000 | 0.343115000  | 6  | 1.051324000  | 4.565677000  | -0.194987000 |
| 1  | 6.821654000  | -1.067321000 | 1.067141000  | 6  | -0.869022000 | 3.507344000  | 0.768220000  |
| 1  | 6.312784000  | 0.071772000  | -0.248707000 | 6  | 0.491358000  | 5.807336000  | 0.065980000  |
| 6  | 1.415957000  | 1.276732000  | 3.897901000  | 1  | 2.006501000  | 4.510153000  | -0.673107000 |
| 6  | 1.931876000  | 0.006731000  | 3.963916000  | 6  | -1.418145000 | 4.743844000  | 1.040443000  |
| 6  | 2.223491000  | -0.712215000 | 2.814198000  | 1  | -1.410066000 | 2.618100000  | 1.024899000  |
| 6  | 2.006187000  | -0.235588000 | 1.538949000  | 6  | -0.738392000 | 5.899368000  | 0.686421000  |
| 6  | 1.459171000  | 1.072889000  | 1.450421000  | 6  | 2.645720000  | 2.016647000  | -1.000442000 |
| 6  | 1.188580000  | 1.792247000  | 2.615177000  | 6  | 2.754195000  | 1.801379000  | -2.369040000 |
| 6  | 2.493972000  | -1.069842000 | 0.407868000  | 6  | 3.755867000  | 2.467501000  | -0.292846000 |
| 6  | 3.863254000  | -1.183757000 | 0.271950000  | 6  | 3.950059000  | 2.042415000  | -3.024494000 |
| 6  | 4.477563000  | -2.004815000 | -0.663233000 | 1  | 1.898274000  | 1.448060000  | -2.908998000 |
| 6  | 3.740954000  | -2.790618000 | -1.513507000 | 6  | 4.947540000  | 2.713819000  | -0.948985000 |
| 6  | 2.348453000  | -2.696303000 | -1.401917000 | 1  | 3.689720000  | 2.617576000  | 0.766043000  |
| 6  | 1.712725000  | -1.863915000 | -0.477713000 | 6  | 5.044979000  | 2.501550000  | -2.316198000 |
| 15 | 1.022548000  | 1.719961000  | -0.211379000 | 8  | 2.705988000  | -1.943290000 | 3.162319000  |
| 15 | -0.099794000 | -1.604205000 | -0.601458000 | 8  | 4.823037000  | -0.568602000 | 1.026587000  |
| 1  | 1.194053000  | 1.851676000  | 4.792692000  | 8  | 2.229451000  | -0.745248000 | 5.061171000  |
| 1  | 0.780571000  | 2.794005000  | 2.533419000  | 8  | 5.831426000  | -1.916887000 | -0.528083000 |
| 1  | 4.212458000  | -3.451207000 | -2.235845000 | 29 | -0.243802000 | 0.407927000  | -1.468759000 |
| 1  | 1.742261000  | -3.298670000 | -2.069891000 | 6  | 2.903468000  | -1.889890000 | 4.563945000  |
| 6  | -0.642787000 | -3.014646000 | -1.645945000 | 1  | 2.485463000  | -2.790503000 | 5.028102000  |
| 6  | -1.097139000 | -4.220051000 | -1.129423000 | 1  | 3.981091000  | -1.805605000 | 4.782107000  |
| 6  | -0.609860000 | -2.844551000 | -3.028659000 | 6  | -1.059984000 | 0.990888000  | -3.213458000 |
| 6  | -1.499042000 | -5.239996000 | -1.976235000 | 1  | -1.067383000 | 0.220136000  | -3.994393000 |
| 1  | -1.148385000 | -4.363639000 | -0.070263000 | 6  | -0.686751000 | 2.348494000  | -3.777031000 |
| 6  | -1.002404000 | -3.865565000 | -3.873331000 | 1  | 0.176748000  | 2.267352000  | -4.451239000 |
| 1  | -0.287089000 | -1.905762000 | -3.433432000 | 1  | -1.506695000 | 2.808503000  | -4.358278000 |
| 6  | -1.448840000 | -5.066573000 | -3.346929000 | 1  | -0.400749000 | 3.075125000  | -3.002902000 |
| 6  | -0.812235000 | -1.970591000 | 1.039596000  | 6  | -2.281295000 | 0.914574000  | -2.413866000 |
| 6  | -2.025987000 | -1.367680000 | 1.355526000  | 6  | -2.737120000 | 1.984813000  | -1.608250000 |
| 6  | -0.227066000 | -2.840482000 | 1.953496000  | 6  | -3.070845000 | -0.264127000 | -2.365385000 |
| 6  | -2.652029000 | -1.642489000 | 2.559060000  | 6  | -3.843018000 | 1.859178000  | -0.779409000 |
| 1  | -2.490634000 | -0.692909000 | 0.664041000  | 1  | -2.207224000 | 2.935531000  | -1.640889000 |
| 6  | -0.852175000 | -3.108297000 | 3.157805000  | 6  | -4.174216000 | -0.379017000 | -1.544996000 |
| 1  | 0.725201000  | -3.283491000 | 1.741458000  | 1  | -2.772241000 | -1.114954000 | -2.977829000 |
| 6  | -2.066270000 | -2.513715000 | 3.459566000  | 6  | -4.587373000 | 0.676176000  | -0.711723000 |
| 6  | 0.379761000  | 3.402867000  | 0.153860000  | 1  | -4.161452000 | 2.723756000  | -0.194699000 |

|   |              |              |              |    |              |              |              |
|---|--------------|--------------|--------------|----|--------------|--------------|--------------|
| 1 | -4.715741000 | -1.325391000 | -1.519808000 | 6  | -2.985989000 | -0.481267000 | -0.869651000 |
| 6 | -5.734344000 | 0.533287000  | 0.199190000  | 6  | -3.495579000 | -1.212285000 | -1.920687000 |
| 6 | -6.833425000 | -0.271454000 | -0.132628000 | 6  | -3.745172000 | -0.672842000 | -3.176625000 |
| 6 | -5.760110000 | 1.188605000  | 1.439143000  | 6  | -3.535484000 | 0.658574000  | -3.436397000 |
| 6 | -7.907252000 | -0.416285000 | 0.735549000  | 6  | -3.018262000 | 1.427997000  | -2.386684000 |
| 1 | -6.853893000 | -0.769348000 | -1.101566000 | 6  | -2.741011000 | 0.896996000  | -1.127889000 |
| 6 | -6.836655000 | 1.049579000  | 2.306106000  | 15 | -0.108742000 | -1.369891000 | 0.205309000  |
| 1 | -4.907621000 | 1.800724000  | 1.733885000  | 15 | -1.723805000 | 1.854938000  | 0.051190000  |
| 6 | -7.917234000 | 0.243867000  | 1.960883000  | 1  | -3.036820000 | -3.153876000 | 3.854796000  |
| 1 | -8.750379000 | -1.042836000 | 0.447241000  | 1  | -0.872883000 | -2.739812000 | 2.705043000  |
| 1 | -6.826881000 | 1.568463000  | 3.264047000  | 1  | -3.744724000 | 1.090981000  | -4.410620000 |
| 1 | -8.760529000 | 0.131952000  | 2.640263000  | 1  | -2.805435000 | 2.475880000  | -2.573881000 |
| 1 | -0.393468000 | -3.777837000 | 3.858467000  | 6  | -1.851710000 | 3.601880000  | -0.504840000 |
| 1 | -2.549646000 | -2.725732000 | 4.392715000  | 6  | -2.712959000 | 4.516661000  | 0.089667000  |
| 1 | -1.851843000 | -6.164434000 | -1.563897000 | 6  | -1.011538000 | 4.032808000  | -1.532903000 |
| 1 | -1.761413000 | -5.856321000 | -4.000996000 | 6  | -2.742405000 | 5.833233000  | -0.336333000 |
| 1 | -0.970768000 | -3.721064000 | -4.935026000 | 1  | -3.355600000 | 4.210442000  | 0.887671000  |
| 1 | -3.592104000 | -1.178617000 | 2.782320000  | 6  | -1.050469000 | 5.347953000  | -1.958333000 |
| 1 | -1.169741000 | 6.859371000  | 0.889341000  | 1  | -0.351973000 | 3.333423000  | -2.005106000 |
| 1 | 1.019954000  | 6.696000000  | -0.216363000 | 6  | -1.912754000 | 6.250653000  | -1.360618000 |
| 1 | -2.375937000 | 4.808630000  | 1.517552000  | 6  | -2.617112000 | 1.862349000  | 1.646577000  |
| 1 | 5.795337000  | 3.072718000  | -0.399144000 | 6  | -1.877382000 | 2.001973000  | 2.815557000  |
| 1 | 5.969712000  | 2.694185000  | -2.823531000 | 6  | -4.003456000 | 1.786376000  | 1.731363000  |
| 1 | 4.021981000  | 1.873383000  | -4.080241000 | 6  | -2.508750000 | 2.071705000  | 4.045112000  |

**L2-inner-TS2-I**

|   |              |              |              |   |              |              |              |
|---|--------------|--------------|--------------|---|--------------|--------------|--------------|
| 6 | 1.382550000  | 0.914373000  | -2.012390000 | 6 | -4.633355000 | 1.854837000  | 2.960441000  |
| 8 | 0.348732000  | 1.376800000  | -2.504706000 | 1 | -4.586926000 | 1.646388000  | 0.843896000  |
| 8 | 2.301881000  | 0.201856000  | -2.331294000 | 6 | -3.887860000 | 1.999897000  | 4.118319000  |
| 6 | -4.048702000 | -2.852661000 | -3.279495000 | 6 | 1.105039000  | -1.920375000 | 1.468436000  |
| 1 | -4.926022000 | -3.497093000 | -3.393445000 | 6 | 1.959549000  | -2.992761000 | 1.273037000  |
| 1 | -3.136405000 | -3.345514000 | -3.652814000 | 6 | 1.215777000  | -1.171953000 | 2.641977000  |
| 6 | -2.996557000 | -2.605997000 | 2.917495000  | 6 | 2.913816000  | -3.310807000 | 2.228948000  |
| 6 | -4.130800000 | -2.119654000 | 2.314370000  | 1 | 1.893722000  | -3.573958000 | 0.377142000  |
| 6 | -4.069069000 | -1.426764000 | 1.114696000  | 6 | 2.158556000  | -1.494982000 | 3.595283000  |
| 6 | -2.891412000 | -1.157096000 | 0.450384000  | 1 | 0.552839000  | -0.344218000 | 2.810476000  |
| 6 | -1.709299000 | -1.647030000 | 1.060040000  | 6 | 3.015278000  | -2.566591000 | 3.387344000  |
| 6 | -1.785987000 | -2.359834000 | 2.258225000  | 6 | -0.084687000 | -2.686211000 | -1.071179000 |
|   |              |              |              | 6 | 0.775734000  | -2.570817000 | -2.160265000 |

|    |              |              |              |                        |              |              |              |
|----|--------------|--------------|--------------|------------------------|--------------|--------------|--------------|
| 6  | -0.888379000 | -3.818097000 | -0.958629000 | 1                      | 1.521821000  | 1.869671000  | 1.763902000  |
| 6  | 0.828309000  | -3.574190000 | -3.113808000 | 1                      | 0.655574000  | 3.180900000  | 0.923878000  |
| 1  | 1.403569000  | -1.711165000 | -2.273463000 | 1                      | 1.987944000  | 2.895062000  | -1.094020000 |
| 6  | -0.832453000 | -4.815188000 | -1.914616000 | 1                      | -1.935640000 | 7.270935000  | -1.689050000 |
| 1  | -1.565749000 | -3.916624000 | -0.136935000 | 1                      | -3.410393000 | 6.527918000  | 0.133023000  |
| 6  | 0.027408000  | -4.694601000 | -2.993999000 | 1                      | -0.404953000 | 5.665082000  | -2.753160000 |
| 8  | -5.327300000 | -1.029030000 | 0.758215000  | 1                      | -5.702227000 | 1.794009000  | 3.014948000  |
| 8  | -3.877238000 | -2.524182000 | -1.910560000 | 1                      | -4.378474000 | 2.052269000  | 5.069855000  |
| 8  | -5.424159000 | -2.189940000 | 2.734546000  | 1                      | -1.927062000 | 2.182270000  | 4.938524000  |
| 8  | -4.258457000 | -1.640316000 | -3.987915000 | 1                      | 1.494503000  | -3.471410000 | -3.946672000 |
| 29 | 0.235524000  | 0.785606000  | -0.288155000 | 1                      | 0.072040000  | -5.469089000 | -3.734277000 |
| 6  | -6.198229000 | -1.703865000 | 1.648357000  | 1                      | -1.455041000 | -5.682298000 | -1.814714000 |
| 1  | -6.954987000 | -1.005783000 | 2.022623000  | 1                      | 3.573340000  | -4.138914000 | 2.062024000  |
| 1  | -6.673889000 | -2.552017000 | 1.128630000  | 1                      | 3.753888000  | -2.812900000 | 4.123796000  |
| 6  | 8.583119000  | 1.180567000  | 0.040814000  | 1                      | 2.233362000  | -0.913295000 | 4.492373000  |
| 6  | 9.901182000  | 0.757050000  | 0.155625000  |                        |              |              |              |
| 6  | 10.192677000 | -0.594267000 | 0.313291000  |                        |              |              |              |
| 6  | 9.151514000  | -1.516406000 | 0.352748000  |                        |              |              |              |
| 6  | 7.834475000  | -1.091230000 | 0.234565000  |                        |              |              |              |
| 6  | 7.524440000  | 0.265117000  | 0.077183000  |                        |              |              |              |
| 6  | 6.124245000  | 0.713295000  | -0.047610000 |                        |              |              |              |
| 6  | 5.775331000  | 1.779135000  | -0.883051000 |                        |              |              |              |
| 6  | 4.455599000  | 2.190427000  | -1.001069000 |                        |              |              |              |
| 6  | 3.429229000  | 1.563084000  | -0.291846000 |                        |              |              |              |
| 6  | 5.096214000  | 0.082662000  | 0.662274000  |                        |              |              |              |
| 6  | 3.779784000  | 0.500115000  | 0.542799000  |                        |              |              |              |
| 6  | 2.019646000  | 2.039997000  | -0.403224000 |                        |              |              |              |
| 1  | 11.225490000 | -0.926851000 | 0.403769000  |                        |              |              |              |
| 1  | 10.706671000 | 1.489848000  | 0.130943000  |                        |              |              |              |
| 1  | 8.362491000  | 2.243591000  | -0.053925000 |                        |              |              |              |
| 1  | 7.026683000  | -1.822617000 | 0.234536000  |                        |              |              |              |
| 1  | 9.367225000  | -2.578186000 | 0.465270000  |                        |              |              |              |
| 1  | 5.333205000  | -0.738218000 | 1.339016000  |                        |              |              |              |
| 1  | 6.547570000  | 2.271564000  | -1.474583000 |                        |              |              |              |
| 1  | 4.207446000  | 3.010896000  | -1.676606000 |                        |              |              |              |
| 1  | 3.007334000  | -0.014740000 | 1.109458000  |                        |              |              |              |
| 6  | 1.597675000  | 2.624705000  | 0.967433000  |                        |              |              |              |
| 1  | 2.374608000  | 3.332965000  | 1.301567000  |                        |              |              |              |
|    |              |              |              | <b>L2-inner-TS2-II</b> |              |              |              |
|    |              |              |              | 8                      | -0.340795000 | 3.678624000  | -1.524582000 |
|    |              |              |              | 6                      | 0.288840000  | 2.664768000  | -1.332730000 |
|    |              |              |              | 8                      | 0.716070000  | 1.694999000  | -1.950004000 |
|    |              |              |              | 29                     | -0.190553000 | 1.298694000  | 0.219660000  |
|    |              |              |              | 15                     | -2.413353000 | 1.382304000  | 0.111395000  |
|    |              |              |              | 15                     | 0.368229000  | -0.817365000 | 0.712900000  |
|    |              |              |              | 1                      | -4.281430000 | -4.917102000 | -1.671838000 |
|    |              |              |              | 6                      | -4.639829000 | -4.159335000 | -0.954867000 |
|    |              |              |              | 6                      | -0.637097000 | -2.529526000 | -4.354273000 |
|    |              |              |              | 6                      | -2.051872000 | 0.687795000  | -3.866370000 |
|    |              |              |              | 6                      | -1.606309000 | -0.609763000 | -3.886082000 |
|    |              |              |              | 6                      | -1.581132000 | -1.385970000 | -2.732837000 |
|    |              |              |              | 6                      | -1.944527000 | -0.913121000 | -1.491210000 |
|    |              |              |              | 6                      | -2.402875000 | 0.436704000  | -1.449000000 |
|    |              |              |              | 6                      | -2.430958000 | 1.198921000  | -2.620134000 |
|    |              |              |              | 6                      | -1.981264000 | -1.883307000 | -0.366829000 |
|    |              |              |              | 6                      | -2.978384000 | -2.834792000 | -0.373728000 |
|    |              |              |              | 6                      | -3.129914000 | -3.799642000 | 0.610594000  |
|    |              |              |              | 6                      | -2.264003000 | -3.875001000 | 1.674712000  |
|    |              |              |              | 6                      | -1.225191000 | -2.936975000 | 1.697658000  |
|    |              |              |              | 6                      | -1.066052000 | -1.962487000 | 0.710023000  |



|   |              |              |              |   |              |              |              |
|---|--------------|--------------|--------------|---|--------------|--------------|--------------|
| 1 | -2.078975000 | 1.298436000  | -4.764036000 | 8 | -4.251950000 | -4.533210000 | 0.359247000  |
| 1 | -2.727525000 | 2.242786000  | -2.561103000 | 1 | -5.728715000 | -4.059847000 | -1.001348000 |
| 1 | -2.385239000 | -4.615567000 | 2.460425000  | 1 | -0.906051000 | -3.406218000 | -4.951120000 |
| 1 | -0.521706000 | -2.969214000 | 2.524490000  | 1 | 0.456743000  | -2.413469000 | -4.277869000 |
| 6 | -3.443701000 | 2.860104000  | -0.215890000 | 1 | 2.863946000  | -1.987225000 | 1.872679000  |
| 6 | -2.910683000 | 4.130897000  | -0.057347000 | 6 | 1.276766000  | 2.903383000  | 0.468674000  |
| 6 | -4.791032000 | 2.727542000  | -0.551247000 | 6 | 2.645424000  | 2.336270000  | 0.367780000  |
| 6 | -3.711858000 | 5.250775000  | -0.225618000 | 6 | 3.225772000  | 1.531186000  | 1.354604000  |
| 1 | -1.870938000 | 4.252455000  | 0.149405000  | 6 | 3.427476000  | 2.618829000  | -0.762733000 |
| 6 | -5.583641000 | 3.841889000  | -0.727216000 | 6 | 4.506959000  | 1.014946000  | 1.207460000  |
| 1 | -5.219053000 | 1.753029000  | -0.672683000 | 1 | 2.673150000  | 1.304990000  | 2.264850000  |
| 6 | -5.043046000 | 5.108780000  | -0.559054000 | 6 | 4.708654000  | 2.114845000  | -0.906016000 |
| 6 | -3.443808000 | 0.543660000  | 1.368750000  | 1 | 3.007211000  | 3.243419000  | -1.551985000 |
| 6 | -3.262730000 | 0.964061000  | 2.683741000  | 6 | 5.277063000  | 1.291915000  | 0.074796000  |
| 6 | -4.439338000 | -0.381951000 | 1.087961000  | 1 | 4.931946000  | 0.411483000  | 2.009821000  |
| 6 | -4.052594000 | 0.460464000  | 3.700168000  | 1 | 5.276174000  | 2.340679000  | -1.809362000 |
| 1 | -2.509109000 | 1.696514000  | 2.907240000  | 6 | 0.716050000  | 3.046451000  | 1.887185000  |
| 6 | -5.224937000 | -0.890461000 | 2.108227000  | 1 | 1.375759000  | 3.689133000  | 2.495103000  |
| 1 | -4.594061000 | -0.724963000 | 0.085057000  | 1 | -0.271268000 | 3.527364000  | 1.869704000  |
| 6 | -5.034555000 | -0.471649000 | 3.412651000  | 1 | 0.616210000  | 2.105902000  | 2.447666000  |
| 6 | 1.030655000  | -1.041845000 | 2.412963000  | 6 | 6.638205000  | 0.746418000  | -0.080950000 |
| 6 | 0.271805000  | -0.554657000 | 3.477702000  | 6 | 7.654540000  | 1.504993000  | -0.674181000 |
| 6 | 2.265222000  | -1.616410000 | 2.677635000  | 6 | 6.952123000  | -0.545361000 | 0.358678000  |
| 6 | 0.740671000  | -0.641795000 | 4.773644000  | 6 | 8.937211000  | 0.992833000  | -0.821358000 |
| 1 | -0.694065000 | -0.125768000 | 3.292606000  | 1 | 7.437006000  | 2.522367000  | -0.998637000 |
| 6 | 2.735701000  | -1.699622000 | 3.979364000  | 6 | 8.235167000  | -1.057984000 | 0.215173000  |
| 6 | 1.977978000  | -1.212969000 | 5.026985000  | 1 | 6.164960000  | -1.163089000 | 0.790550000  |
| 6 | 1.535385000  | -1.687539000 | -0.393434000 | 6 | 9.234769000  | -0.291395000 | -0.375844000 |
| 6 | 2.258326000  | -0.961228000 | -1.330324000 | 1 | 9.713098000  | 1.605409000  | -1.278497000 |
| 6 | 1.715613000  | -3.069147000 | -0.314727000 | 1 | 8.453676000  | -2.068529000 | 0.558031000  |
| 6 | 3.163517000  | -1.607013000 | -2.161340000 | 1 | 10.240378000 | -0.693006000 | -0.489336000 |
| 1 | 2.103020000  | 0.090840000  | -1.433377000 | 1 | 1.306840000  | 3.922659000  | 0.071045000  |
| 6 | 2.615523000  | -3.706480000 | -1.142840000 | 1 | -5.659528000 | 5.975725000  | -0.692367000 |
| 1 | 1.143114000  | -3.645690000 | 0.383388000  | 1 | -6.616709000 | 3.727782000  | -0.989184000 |
| 6 | 3.345702000  | -2.971740000 | -2.066914000 | 1 | -3.286166000 | 6.226833000  | -0.106419000 |
| 8 | -1.196887000 | -1.365461000 | -4.943775000 | 1 | -5.646791000 | -0.866893000 | 4.198613000  |
| 8 | -1.187392000 | -2.653821000 | -3.054177000 | 1 | -5.983203000 | -1.614013000 | 1.883384000  |
| 8 | -4.035672000 | -2.911330000 | -1.241510000 | 1 | -3.906744000 | 0.796443000  | 4.707625000  |

|   |             |              |              |   |              |             |              |
|---|-------------|--------------|--------------|---|--------------|-------------|--------------|
| 1 | 3.722932000 | -1.033203000 | -2.872215000 | 6 | -3.067173000 | 1.654615000 | 0.019661000  |
| 1 | 2.746174000 | -4.768341000 | -1.074470000 | 6 | -3.685261000 | 1.164707000 | 1.163130000  |
| 1 | 4.049274000 | -3.465931000 | -2.707752000 | 6 | -3.856171000 | 2.116541000 | -1.030170000 |
| 1 | 0.145286000 | -0.267088000 | 5.582369000  | 6 | -5.067859000 | 1.154824000 | 1.258494000  |
| 1 | 2.344638000 | -1.276120000 | 6.032102000  | 1 | -3.104268000 | 0.777355000 | 1.972945000  |
| 1 | 3.692948000 | -2.143163000 | 4.169095000  | 6 | -5.233028000 | 2.107828000 | -0.932362000 |

### L2-inner-TS2-III

|    |              |              |              |   |              |              |              |
|----|--------------|--------------|--------------|---|--------------|--------------|--------------|
| 29 | -0.009094000 | 0.773395000  | 1.521097000  | 6 | -3.400423000 | 2.486026000  | -1.925234000 |
| 15 | -1.235423000 | 1.748345000  | -0.062598000 | 6 | -5.842059000 | 1.630266000  | 0.218558000  |
| 15 | -0.007423000 | -1.442875000 | 0.941761000  | 6 | 0.292254000  | -2.631056000 | 2.321698000  |
| 1  | -5.809511000 | -2.035641000 | -3.116082000 | 6 | -0.317135000 | -2.388620000 | 3.554887000  |
| 6  | -5.439870000 | -1.540662000 | -2.211061000 | 6 | 1.152563000  | -3.717190000 | 2.205097000  |
| 6  | -0.659847000 | -2.475302000 | -4.682565000 | 6 | -0.094305000 | -3.236891000 | 4.624034000  |
| 6  | 0.559004000  | 0.716786000  | -3.638880000 | 1 | -0.943138000 | -1.529681000 | 3.679977000  |
| 6  | -0.039353000 | -0.493218000 | -3.888396000 | 6 | 1.382182000  | -4.555168000 | 3.283744000  |
| 6  | -0.936774000 | -1.055654000 | -2.992095000 | 6 | 0.754008000  | -4.322723000 | 4.492105000  |
| 6  | -1.307229000 | -0.453566000 | -1.807284000 | 6 | 0.997637000  | -2.121741000 | -0.433704000 |
| 6  | -0.785495000 | 0.851935000  | -1.591059000 | 6 | 2.070411000  | -1.402763000 | -0.936492000 |
| 6  | 0.165612000  | 1.376864000  | -2.467625000 | 6 | 0.704417000  | -3.371010000 | -0.980126000 |
| 6  | -2.161011000 | -1.229725000 | -0.870262000 | 6 | 2.853109000  | -1.927999000 | -1.954394000 |
| 6  | -3.449762000 | -1.537951000 | -1.246181000 | 1 | 2.296850000  | -0.432644000 | -0.550940000 |
| 6  | -4.305419000 | -2.317028000 | -0.478022000 | 6 | 1.490501000  | -3.899238000 | -1.984297000 |
| 6  | -3.901230000 | -2.862219000 | 0.714343000  | 1 | -0.139609000 | -3.924871000 | -0.620586000 |
| 6  | -2.584423000 | -2.591462000 | 1.113212000  | 6 | 2.569931000  | -3.176484000 | -2.472064000 |
| 6  | -1.717215000 | -1.803329000 | 0.359823000  | 8 | 0.146041000  | -1.334929000 | -4.940723000 |
| 1  | 1.299483000  | 1.137861000  | -4.313163000 | 8 | -1.327029000 | -2.278097000 | -3.447917000 |
| 1  | 0.616281000  | 2.339732000  | -2.242330000 | 8 | -4.084723000 | -1.169882000 | -2.395724000 |
| 1  | -4.563208000 | -3.481628000 | 1.313112000  | 8 | -5.499298000 | -2.448253000 | -1.120388000 |
| 1  | -2.229795000 | -3.025475000 | 2.042977000  | 1 | -6.035526000 | -0.646021000 | -1.974946000 |
| 6  | -0.933458000 | 3.528905000  | -0.404306000 | 1 | -1.401897000 | -2.587836000 | -5.486291000 |
| 6  | -0.605216000 | 4.330798000  | 0.685906000  | 1 | -0.021594000 | -3.366018000 | -4.617480000 |
| 6  | -1.107302000 | 4.132738000  | -1.648591000 | 8 | -1.508677000 | 0.448994000  | 3.484161000  |
| 6  | -0.423931000 | 5.695112000  | 0.525824000  | 6 | -1.013680000 | 1.551340000  | 3.276319000  |
| 1  | -0.533232000 | 3.902342000  | 1.664684000  | 8 | -1.258918000 | 2.722330000  | 3.421609000  |
| 6  | -0.920253000 | 5.492316000  | -1.805585000 | 6 | 1.110900000  | 1.538442000  | 3.136460000  |
| 1  | -1.377817000 | 3.544842000  | -2.500929000 | 1 | 1.048087000  | 2.627424000  | 3.210795000  |
| 6  | -0.572379000 | 6.276459000  | -0.718062000 | 6 | 2.176578000  | 1.212367000  | 2.149944000  |
|    |              |              |              | 6 | 3.062772000  | 0.125595000  | 2.301619000  |
|    |              |              |              | 6 | 2.440089000  | 2.097229000  | 1.081716000  |

|                                         |              |              |              |    |              |              |              |
|-----------------------------------------|--------------|--------------|--------------|----|--------------|--------------|--------------|
| 6                                       | 4.160699000  | -0.030132000 | 1.473182000  | 15 | -2.073424000 | 1.570244000  | -0.226170000 |
| 1                                       | 2.895439000  | -0.593534000 | 3.102507000  | 15 | -0.028217000 | -1.110855000 | 1.099195000  |
| 6                                       | 3.525080000  | 1.917399000  | 0.237216000  | 1  | -4.919814000 | -4.257947000 | -2.175260000 |
| 1                                       | 1.791397000  | 2.962525000  | 0.938026000  | 6  | -5.200351000 | -3.385200000 | -1.562541000 |
| 6                                       | 4.430063000  | 0.865344000  | 0.427895000  | 6  | -0.230918000 | -3.143128000 | -3.891739000 |
| 1                                       | 4.850330000  | -0.852265000 | 1.663112000  | 6  | -0.648577000 | 0.385689000  | -3.876746000 |
| 1                                       | 3.677663000  | 2.618566000  | -0.583555000 | 6  | -0.642447000 | -0.981304000 | -3.749434000 |
| 6                                       | 1.297495000  | 0.894640000  | 4.493215000  | 6  | -1.176328000 | -1.604903000 | -2.627979000 |
| 1                                       | 2.326920000  | 1.027403000  | 4.863486000  | 6  | -1.703011000 | -0.918019000 | -1.554513000 |
| 1                                       | 0.616323000  | 1.333975000  | 5.232154000  | 6  | -1.727124000 | 0.501098000  | -1.672264000 |
| 1                                       | 1.086125000  | -0.181470000 | 4.465863000  | 6  | -1.199481000 | 1.111678000  | -2.812914000 |
| 6                                       | 5.614711000  | 0.703101000  | -0.435059000 | 6  | -2.266277000 | -1.722595000 | -0.440010000 |
| 6                                       | 6.261752000  | 1.815850000  | -0.988300000 | 6  | -3.437792000 | -2.414975000 | -0.651151000 |
| 6                                       | 6.135326000  | -0.566467000 | -0.720963000 | 6  | -4.013816000 | -3.250139000 | 0.295766000  |
| 6                                       | 7.378900000  | 1.666198000  | -1.799525000 | 6  | -3.427224000 | -3.455470000 | 1.520692000  |
| 1                                       | 5.899743000  | 2.815887000  | -0.751919000 | 6  | -2.220650000 | -2.783313000 | 1.755544000  |
| 6                                       | 7.254606000  | -0.716897000 | -1.530161000 | 6  | -1.640411000 | -1.931806000 | 0.815177000  |
| 1                                       | 5.635844000  | -1.449931000 | -0.324848000 | 1  | -0.245406000 | 0.880271000  | -4.755850000 |
| 6                                       | 7.882112000  | 0.398531000  | -2.075343000 | 1  | -1.215739000 | 2.195362000  | -2.883906000 |
| 1                                       | 7.867754000  | 2.548597000  | -2.209805000 | 1  | -3.874402000 | -4.106777000 | 2.266458000  |
| 1                                       | 7.635657000  | -1.715275000 | -1.740458000 | 1  | -1.723109000 | -2.934608000 | 2.708628000  |
| 1                                       | 8.759569000  | 0.281181000  | -2.708824000 | 6  | -2.392188000 | 3.224361000  | -0.947955000 |
| 1                                       | 1.649044000  | -3.913501000 | 1.279885000  | 6  | -1.347205000 | 4.134671000  | -1.081728000 |
| 1                                       | -1.051320000 | 5.939054000  | -2.771264000 | 6  | -3.670228000 | 3.613291000  | -1.342411000 |
| 1                                       | -0.428716000 | 7.331640000  | -0.840796000 | 6  | -1.573286000 | 5.395505000  | -1.607284000 |
| 1                                       | -0.176349000 | 6.296256000  | 1.377702000  | 1  | -0.347026000 | 3.905232000  | -0.786164000 |
| 1                                       | 2.050580000  | -5.386203000 | 3.174466000  | 6  | -3.893410000 | 4.871407000  | -1.867685000 |
| 1                                       | 0.929518000  | -4.974126000 | 5.325292000  | 1  | -4.494982000 | 2.941443000  | -1.229317000 |
| 1                                       | -0.574942000 | -3.039037000 | 5.561580000  | 6  | -2.844442000 | 5.765876000  | -2.001718000 |
| 1                                       | 3.677710000  | -1.359034000 | -2.332921000 | 6  | -3.678569000 | 1.095565000  | 0.493691000  |
| 1                                       | 3.179781000  | -3.584352000 | -3.254007000 | 6  | -3.886515000 | 1.404985000  | 1.833935000  |
| 1                                       | 1.263391000  | -4.867056000 | -2.386326000 | 6  | -4.709679000 | 0.512900000  | -0.233589000 |
| 1                                       | -5.828204000 | 2.478951000  | -1.743376000 | 6  | -5.103739000 | 1.143020000  | 2.436102000  |
| 1                                       | -6.911213000 | 1.632765000  | 0.301009000  | 1  | -3.098308000 | 1.858531000  | 2.405111000  |
| 1                                       | -5.530759000 | 0.777997000  | 2.148226000  | 6  | -5.925424000 | 0.248762000  | 0.370875000  |
|                                         |              |              |              | 1  | -4.559280000 | 0.237477000  | -1.258019000 |
|                                         |              |              |              | 6  | -6.125262000 | 0.565535000  | 1.703522000  |
|                                         |              |              |              | 6  | 0.329411000  | -1.482776000 | 2.857068000  |
| <b>L2-outer-TS2-<math>\eta^1</math></b> |              |              |              |    |              |              |              |
| 29                                      | -0.173149000 | 1.053806000  | 0.748644000  |    |              |              |              |

|   |              |              |              |                                         |              |              |              |
|---|--------------|--------------|--------------|-----------------------------------------|--------------|--------------|--------------|
| 6 | -0.504658000 | -0.930933000 | 3.831178000  | 6                                       | 6.276718000  | 0.184963000  | -0.541147000 |
| 6 | 1.436894000  | -2.214290000 | 3.256639000  | 6                                       | 7.018147000  | 0.760212000  | -1.582287000 |
| 6 | -0.239199000 | -1.120243000 | 5.171570000  | 6                                       | 6.771261000  | -0.991058000 | 0.039878000  |
| 1 | -1.366899000 | -0.362450000 | 3.536522000  | 6                                       | 8.201902000  | 0.183721000  | -2.024321000 |
| 6 | 1.706296000  | -2.396150000 | 4.604922000  | 1                                       | 6.671495000  | 1.691925000  | -2.028698000 |
| 6 | 0.871472000  | -1.853696000 | 5.561360000  | 6                                       | 7.958881000  | -1.564554000 | -0.396368000 |
| 6 | 1.120728000  | -2.149808000 | 0.134169000  | 1                                       | 6.196822000  | -1.473458000 | 0.830593000  |
| 6 | 2.232068000  | -1.571101000 | -0.464794000 | 6                                       | 8.680857000  | -0.981770000 | -1.433268000 |
| 6 | 0.929043000  | -3.526318000 | 0.021850000  | 1                                       | 8.762375000  | 0.656883000  | -2.829611000 |
| 6 | 3.141881000  | -2.354842000 | -1.158775000 | 1                                       | 8.318255000  | -2.480395000 | 0.071500000  |
| 1 | 2.403748000  | -0.518703000 | -0.393871000 | 1                                       | 9.610953000  | -1.431150000 | -1.777286000 |
| 6 | 1.833847000  | -4.304806000 | -0.671759000 | 8                                       | 1.684759000  | 4.819851000  | -0.063388000 |
| 1 | 0.070170000  | -3.986042000 | 0.466318000  | 6                                       | 1.879728000  | 4.514810000  | 1.085382000  |
| 6 | 2.944891000  | -3.718437000 | -1.261392000 | 8                                       | 2.257021000  | 4.837372000  | 2.171419000  |
| 8 | -0.203078000 | -1.926137000 | -4.624812000 | 1                                       | -6.713933000 | -0.204726000 | -0.196135000 |
| 8 | -1.102473000 | -2.957112000 | -2.787442000 | 1                                       | -7.069000000 | 0.360240000  | 2.168173000  |
| 8 | -4.250337000 | -2.350044000 | -1.748973000 | 1                                       | -5.253330000 | 1.390167000  | 3.468087000  |
| 8 | -5.185609000 | -3.746692000 | -0.190235000 | 1                                       | -0.749149000 | 6.075294000  | -1.686143000 |
| 1 | -6.197020000 | -3.022846000 | -1.835009000 | 1                                       | -3.020434000 | 6.744418000  | -2.402345000 |
| 1 | -0.617373000 | -3.943309000 | -4.530762000 | 1                                       | -4.883610000 | 5.154783000  | -2.164675000 |
| 1 | 0.780370000  | -3.374231000 | -3.522902000 | 1                                       | 2.568364000  | -2.959953000 | 4.900697000  |
| 1 | 2.092104000  | -2.637307000 | 2.523993000  | 1                                       | -0.888396000 | -0.693870000 | 5.910040000  |
| 6 | 1.304576000  | 2.530149000  | 1.254434000  | 1                                       | 1.082315000  | -1.994066000 | 6.602660000  |
| 1 | 0.599904000  | 2.855137000  | 0.484077000  | 1                                       | 4.002918000  | -1.894446000 | -1.598197000 |
| 6 | 2.537157000  | 1.900895000  | 0.805322000  | 1                                       | 3.653416000  | -4.324149000 | -1.791417000 |
| 6 | 3.419565000  | 1.265828000  | 1.699040000  | 1                                       | 1.677988000  | -5.362646000 | -0.749078000 |
| 6 | 2.939203000  | 1.965526000  | -0.546600000 |                                         |              |              |              |
| 6 | 4.617495000  | 0.720341000  | 1.262871000  | <b>L2-outer-TS2-<math>\eta^3</math></b> |              |              |              |
| 1 | 3.157714000  | 1.202316000  | 2.754896000  | 29                                      | 0.391796000  | 0.986640000  | 0.566362000  |
| 6 | 4.144097000  | 1.435050000  | -0.968925000 | 15                                      | -1.264502000 | 1.588889000  | -0.772818000 |
| 1 | 2.283104000  | 2.461005000  | -1.264497000 | 15                                      | -0.143156000 | -0.998584000 | 1.388934000  |
| 6 | 5.014264000  | 0.786941000  | -0.078274000 | 1                                       | -5.401344000 | -3.721224000 | -1.748889000 |
| 1 | 5.281280000  | 0.253840000  | 1.991581000  | 6                                       | -5.502102000 | -2.684699000 | -1.385841000 |
| 1 | 4.405867000  | 1.491610000  | -2.026402000 | 6                                       | -0.555290000 | -4.176729000 | -3.075645000 |
| 6 | 0.846159000  | 2.431769000  | 2.687124000  | 6                                       | 0.057883000  | -0.760289000 | -3.834172000 |
| 1 | 1.548680000  | 2.985481000  | 3.331922000  | 6                                       | -0.345939000 | -2.011256000 | -3.435186000 |
| 1 | -0.130016000 | 2.922433000  | 2.816026000  | 6                                       | -1.120769000 | -2.191778000 | -2.297415000 |
| 1 | 0.773094000  | 1.412608000  | 3.098426000  | 6                                       | -1.517607000 | -1.156393000 | -1.474826000 |

|   |              |              |              |   |              |              |              |
|---|--------------|--------------|--------------|---|--------------|--------------|--------------|
| 6 | -1.138969000 | 0.148685000  | -1.889806000 | 6 | 2.718558000  | -3.305928000 | -0.392144000 |
| 6 | -0.350358000 | 0.312189000  | -3.033715000 | 1 | 2.336816000  | -1.235458000 | -0.087265000 |
| 6 | -2.336616000 | -1.502984000 | -0.286380000 | 6 | 1.085988000  | -4.816204000 | 0.507247000  |
| 6 | -3.625088000 | -1.945491000 | -0.487716000 | 1 | -0.575534000 | -3.921410000 | 1.484000000  |
| 6 | -4.460114000 | -2.368951000 | 0.535537000  | 6 | 2.274366000  | -4.596289000 | -0.175157000 |
| 6 | -4.034527000 | -2.387308000 | 1.840758000  | 8 | -0.125838000 | -3.216615000 | -4.029936000 |
| 6 | -2.722168000 | -1.956533000 | 2.076025000  | 8 | -1.414408000 | -3.517114000 | -2.159375000 |
| 6 | -1.877186000 | -1.516185000 | 1.056516000  | 8 | -4.315086000 | -1.965198000 | -1.669038000 |
| 1 | 0.665332000  | -0.611880000 | -4.722583000 | 8 | -5.680231000 | -2.693101000 | 0.022250000  |
| 1 | -0.036509000 | 1.314219000  | -3.315314000 | 1 | -6.354918000 | -2.187615000 | -1.859810000 |
| 1 | -4.681647000 | -2.715539000 | 2.649338000  | 1 | -1.107418000 | -4.973437000 | -3.584565000 |
| 1 | -2.356700000 | -1.966293000 | 3.097660000  | 1 | 0.317710000  | -4.573549000 | -2.534921000 |
| 6 | -1.259341000 | 3.034604000  | -1.900482000 | 1 | 1.374477000  | -2.709260000 | 3.308689000  |
| 6 | -0.476682000 | 4.142574000  | -1.605482000 | 6 | 1.240578000  | 2.875148000  | 1.837320000  |
| 6 | -2.103502000 | 3.083808000  | -3.012265000 | 1 | 0.412548000  | 3.299714000  | 1.270665000  |
| 6 | -0.523077000 | 5.270495000  | -2.414567000 | 6 | 2.159836000  | 2.009895000  | 1.156267000  |
| 1 | 0.183709000  | 4.165108000  | -0.764755000 | 6 | 3.168756000  | 1.287999000  | 1.873031000  |
| 6 | -2.146130000 | 4.203290000  | -3.814528000 | 6 | 2.202792000  | 1.884361000  | -0.274972000 |
| 1 | -2.718756000 | 2.240930000  | -3.254892000 | 6 | 4.148770000  | 0.580783000  | 1.225543000  |
| 6 | -1.352188000 | 5.302627000  | -3.515327000 | 1 | 3.184219000  | 1.354723000  | 2.959470000  |
| 6 | -2.947650000 | 1.677471000  | -0.066661000 | 6 | 3.221433000  | 1.151075000  | -0.899274000 |
| 6 | -3.071798000 | 2.302062000  | 1.170077000  | 1 | 1.636542000  | 2.573787000  | -0.897546000 |
| 6 | -4.094435000 | 1.247923000  | -0.723519000 | 6 | 4.212639000  | 0.487645000  | -0.186496000 |
| 6 | -4.319049000 | 2.499993000  | 1.736392000  | 1 | 4.926581000  | 0.104107000  | 1.822509000  |
| 1 | -2.195218000 | 2.639005000  | 1.691038000  | 1 | 3.221228000  | 1.108021000  | -1.989427000 |
| 6 | -5.338733000 | 1.440645000  | -0.153643000 | 6 | 1.091503000  | 2.811607000  | 3.330461000  |
| 1 | -4.021291000 | 0.733797000  | -1.660582000 | 1 | 1.966211000  | 3.263692000  | 3.823817000  |
| 6 | -5.453910000 | 2.070551000  | 1.074189000  | 1 | 0.214146000  | 3.386494000  | 3.654961000  |
| 6 | -0.026280000 | -1.101287000 | 3.217153000  | 1 | 0.979921000  | 1.792145000  | 3.721166000  |
| 6 | -0.757757000 | -0.185427000 | 3.973706000  | 6 | 5.281272000  | -0.273657000 | -0.855563000 |
| 6 | 0.799392000  | -2.004028000 | 3.871134000  | 6 | 5.742377000  | 0.081679000  | -2.131423000 |
| 6 | -0.678979000 | -0.190443000 | 5.351472000  | 6 | 5.879688000  | -1.380504000 | -0.235378000 |
| 1 | -1.389454000 | 0.529144000  | 3.481272000  | 6 | 6.743969000  | -0.643468000 | -2.763009000 |
| 6 | 0.887286000  | -1.998413000 | 5.254830000  | 1 | 5.328323000  | 0.961934000  | -2.621962000 |
| 6 | 0.147208000  | -1.098259000 | 5.995708000  | 6 | 6.886118000  | -2.103537000 | -0.864309000 |
| 6 | 0.794030000  | -2.440614000 | 0.767333000  | 1 | 5.531049000  | -1.695642000 | 0.747716000  |
| 6 | 1.980849000  | -2.230107000 | 0.079657000  | 6 | 7.323285000  | -1.741799000 | -2.134271000 |
| 6 | 0.348620000  | -3.745281000 | 0.971684000  | 1 | 7.085553000  | -0.337945000 | -3.751102000 |

|   |              |              |              |   |              |              |              |
|---|--------------|--------------|--------------|---|--------------|--------------|--------------|
| 1 | 7.329232000  | -2.959765000 | -0.357105000 | 1 | 0.450924000  | 0.670499000  | -3.286021000 |
| 1 | 8.112674000  | -2.306260000 | -2.627512000 | 1 | -4.233899000 | -2.093651000 | 3.293441000  |
| 8 | 1.962055000  | 5.017274000  | 0.374171000  | 1 | -1.807572000 | -1.544872000 | 3.393668000  |
| 6 | 2.340567000  | 4.663639000  | 1.454261000  | 6 | -0.994293000 | 2.743904000  | -2.178571000 |
| 8 | 3.020740000  | 4.808495000  | 2.419361000  | 6 | -0.789132000 | 4.019654000  | -1.654552000 |
| 1 | -6.217004000 | 1.099715000  | -0.665015000 | 6 | -1.227250000 | 2.614228000  | -3.544587000 |
| 1 | -6.420800000 | 2.221383000  | 1.511466000  | 6 | -0.763410000 | 5.124320000  | -2.488053000 |
| 1 | -4.401720000 | 2.988624000  | 2.686765000  | 1 | -0.691351000 | 4.166949000  | -0.595722000 |
| 1 | 0.096555000  | 6.109208000  | -2.169212000 | 6 | -1.194842000 | 3.720125000  | -4.374718000 |
| 1 | -1.386170000 | 6.173417000  | -4.139646000 | 1 | -1.441321000 | 1.654911000  | -3.967395000 |
| 1 | -2.795497000 | 4.224969000  | -4.667186000 | 6 | -0.952871000 | 4.977055000  | -3.849598000 |
| 1 | 1.533098000  | -2.698084000 | 5.746821000  | 6 | -2.890915000 | 1.498348000  | -0.525464000 |
| 1 | -1.248299000 | 0.517037000  | 5.920521000  | 6 | -3.238856000 | 1.927371000  | 0.749429000  |
| 1 | 0.215367000  | -1.095880000 | 7.065251000  | 6 | -3.887878000 | 1.281156000  | -1.471580000 |
| 1 | 3.635335000  | -3.125691000 | -0.914861000 | 6 | -4.573337000 | 2.125054000  | 1.071799000  |
| 1 | 2.849061000  | -5.428306000 | -0.532286000 | 1 | -2.475136000 | 2.119366000  | 1.477607000  |
| 1 | 0.738383000  | -5.816432000 | 0.674817000  | 6 | -5.213739000 | 1.485644000  | -1.148159000 |

## L2-(S)-IM2

|    |              |              |              |   |              |              |              |
|----|--------------|--------------|--------------|---|--------------|--------------|--------------|
| 29 | 0.208501000  | 1.170851000  | 0.794880000  | 6 | -3.629780000 | 0.953765000  | -2.458813000 |
| 15 | -1.118174000 | 1.385238000  | -0.947026000 | 6 | -5.557827000 | 1.906940000  | 0.128830000  |
| 15 | 0.240023000  | -0.960337000 | 1.392536000  | 6 | 0.640824000  | -1.234033000 | 3.163835000  |
| 1  | -6.076741000 | -3.060156000 | -1.042507000 | 6 | 0.437293000  | -0.161801000 | 4.033293000  |
| 6  | -5.602375000 | -2.181163000 | -0.589857000 | 6 | 1.155678000  | -2.422099000 | 3.668257000  |
| 6  | -1.112007000 | -4.622065000 | -2.779923000 | 6 | 0.712127000  | -0.298478000 | 5.382711000  |
| 6  | 0.267550000  | -1.437014000 | -3.612567000 | 1 | 0.075658000  | 0.772344000  | 3.648668000  |
| 6  | -0.350833000 | -2.569329000 | -3.143342000 | 6 | 1.441297000  | -2.548353000 | 5.016828000  |
| 6  | -1.160259000 | -2.537024000 | -2.016914000 | 6 | 1.213424000  | -1.489897000 | 5.877305000  |
| 6  | -1.418565000 | -1.387594000 | -1.298468000 | 6 | 1.069787000  | -2.334860000 | 0.519124000  |
| 6  | -0.886355000 | -0.186510000 | -1.842608000 | 6 | 2.197585000  | -2.076228000 | -0.246175000 |
| 6  | -0.018552000 | -0.244967000 | -2.935621000 | 6 | 0.618308000  | -3.648468000 | 0.631544000  |
| 6  | -2.151505000 | -1.511747000 | -0.011385000 | 6 | 2.871515000  | -3.108869000 | -0.878876000 |
| 6  | -3.488164000 | -1.841818000 | -0.015972000 | 1 | 2.546243000  | -1.071525000 | -0.356432000 |
| 6  | -4.228214000 | -2.039939000 | 1.142698000  | 6 | 1.298298000  | -4.679681000 | 0.013492000  |
| 6  | -3.657779000 | -1.935406000 | 2.386070000  | 1 | -0.272761000 | -3.861144000 | 1.187028000  |
| 6  | -2.291304000 | -1.624742000 | 2.424764000  | 6 | 2.427238000  | -4.410139000 | -0.744136000 |
| 6  | -1.535630000 | -1.420741000 | 1.271915000  | 8 | -0.249112000 | -3.848427000 | -3.598268000 |
| 1  | 0.946059000  | -1.466616000 | -4.460549000 | 8 | -1.569787000 | -3.802535000 | -1.718426000 |
|    |              |              |              | 8 | -4.288433000 | -2.037374000 | -1.102768000 |
|    |              |              |              | 8 | -5.508232000 | -2.368171000 | 0.814167000  |

|   |              |              |              |
|---|--------------|--------------|--------------|
| 1 | -6.179595000 | -1.268925000 | -0.798617000 |
| 1 | -1.972590000 | -4.965846000 | -3.375844000 |
| 1 | -0.558769000 | -5.475789000 | -2.371824000 |
| 8 | -0.367051000 | 2.316841000  | 2.325519000  |
| 6 | 0.073302000  | 3.504207000  | 2.060638000  |
| 8 | -0.591275000 | 4.451062000  | 1.651287000  |
| 6 | 1.588757000  | 3.682654000  | 2.289398000  |
| 1 | 1.835406000  | 4.678548000  | 1.889585000  |
| 6 | 2.361030000  | 2.669449000  | 1.481901000  |
| 6 | 3.379966000  | 1.871792000  | 2.011893000  |
| 6 | 2.126481000  | 2.586075000  | 0.098982000  |
| 6 | 4.194526000  | 1.109065000  | 1.187434000  |
| 1 | 3.576466000  | 1.884417000  | 3.082225000  |
| 6 | 2.936433000  | 1.804203000  | -0.723840000 |
| 1 | 1.407879000  | 3.261957000  | -0.364104000 |
| 6 | 4.011814000  | 1.079056000  | -0.201696000 |
| 1 | 5.026368000  | 0.562562000  | 1.630388000  |
| 1 | 2.725432000  | 1.777692000  | -1.793635000 |
| 6 | 1.886033000  | 3.666040000  | 3.781387000  |
| 1 | 2.935951000  | 3.908948000  | 3.991626000  |
| 1 | 1.263179000  | 4.409073000  | 4.294192000  |
| 1 | 1.665286000  | 2.682766000  | 4.214863000  |
| 6 | 4.945996000  | 0.343738000  | -1.079191000 |
| 6 | 5.203136000  | 0.785727000  | -2.383248000 |
| 6 | 5.623677000  | -0.795557000 | -0.627373000 |
| 6 | 6.093949000  | 0.110053000  | -3.207066000 |
| 1 | 4.719813000  | 1.691842000  | -2.746498000 |
| 6 | 6.518862000  | -1.470288000 | -1.449086000 |
| 1 | 5.423534000  | -1.178703000 | 0.372499000  |
| 6 | 6.756970000  | -1.022192000 | -2.744329000 |
| 1 | 6.280739000  | 0.479050000  | -4.214295000 |
| 1 | 7.030349000  | -2.355314000 | -1.073510000 |
| 1 | 7.459014000  | -1.549325000 | -3.387873000 |
| 1 | 1.346245000  | -3.246411000 | 3.014698000  |
| 1 | -1.369953000 | 3.600238000  | -5.425746000 |
| 1 | -0.928915000 | 5.833947000  | -4.493338000 |
| 1 | -0.607443000 | 6.096839000  | -2.065662000 |
| 1 | 1.840673000  | -3.470326000 | 5.390863000  |

|   |              |              |              |
|---|--------------|--------------|--------------|
| 1 | 1.431117000  | -1.590088000 | 6.922438000  |
| 1 | 0.540308000  | 0.528796000  | 6.042823000  |
| 1 | 3.737474000  | -2.889916000 | -1.468888000 |
| 1 | 2.951437000  | -5.209366000 | -1.229979000 |
| 1 | 0.946959000  | -5.687484000 | 0.117818000  |
| 1 | -5.974940000 | 1.331184000  | -1.887847000 |
| 1 | -6.587583000 | 2.071749000  | 0.378913000  |
| 1 | -4.833095000 | 2.459521000  | 2.056087000  |

**L2-(R)-IM2**

|    |              |              |              |
|----|--------------|--------------|--------------|
| 6  | 4.211863000  | 2.732736000  | -1.090859000 |
| 1  | 4.674033000  | 3.708462000  | -1.272309000 |
| 1  | 4.488405000  | 2.009952000  | -1.878537000 |
| 6  | -2.077071000 | 3.895994000  | -1.752559000 |
| 6  | -1.163915000 | 4.473507000  | -0.907361000 |
| 6  | -0.173022000 | 3.716835000  | -0.302066000 |
| 6  | -0.021208000 | 2.356104000  | -0.479371000 |
| 6  | -0.934827000 | 1.744350000  | -1.385031000 |
| 6  | -1.934478000 | 2.522264000  | -1.975519000 |
| 6  | 1.090847000  | 1.734068000  | 0.292910000  |
| 6  | 2.387773000  | 2.087171000  | -0.020791000 |
| 6  | 3.496337000  | 1.696037000  | 0.717107000  |
| 6  | 3.368452000  | 0.917119000  | 1.838436000  |
| 6  | 2.065591000  | 0.544053000  | 2.188846000  |
| 6  | 0.937001000  | 0.956246000  | 1.475799000  |
| 15 | -0.884243000 | -0.065904000 | -1.732895000 |
| 15 | -0.676305000 | 0.188488000  | 1.805666000  |
| 1  | -2.877010000 | 4.468764000  | -2.212856000 |
| 1  | -2.648549000 | 2.043924000  | -2.635479000 |
| 1  | 4.234852000  | 0.583660000  | 2.403369000  |
| 1  | 1.935978000  | -0.096954000 | 3.056071000  |
| 6  | -0.688277000 | -0.431769000 | 3.528689000  |
| 6  | -0.076517000 | 0.201713000  | 4.606125000  |
| 6  | -1.501911000 | -1.536174000 | 3.766816000  |
| 6  | -0.226780000 | -0.294353000 | 5.887369000  |
| 1  | 0.508715000  | 1.085759000  | 4.449900000  |
| 6  | -1.658687000 | -2.024179000 | 5.053269000  |
| 1  | -2.032883000 | -1.986358000 | 2.950375000  |

|    |              |              |              |   |              |              |              |
|----|--------------|--------------|--------------|---|--------------|--------------|--------------|
| 6  | -1.012490000 | -1.413259000 | 6.111505000  | 6 | 3.814395000  | -2.064886000 | 0.291511000  |
| 6  | -1.960215000 | 1.476651000  | 1.964551000  | 6 | 2.443679000  | -2.585675000 | 0.136031000  |
| 6  | -3.267970000 | 1.047968000  | 1.752960000  | 6 | 1.983050000  | -3.032875000 | -1.110894000 |
| 6  | -1.724877000 | 2.780188000  | 2.377943000  | 6 | 0.689407000  | -3.495767000 | -1.265473000 |
| 6  | -4.323505000 | 1.920720000  | 1.950406000  | 6 | -0.223809000 | -3.506377000 | -0.201226000 |
| 1  | -3.455728000 | 0.034813000  | 1.446467000  | 6 | 1.564830000  | -2.650658000 | 1.216657000  |
| 6  | -2.783435000 | 3.649504000  | 2.568845000  | 6 | 0.249276000  | -3.089399000 | 1.054413000  |
| 1  | -0.721394000 | 3.127729000  | 2.524141000  | 6 | -1.575170000 | -4.157896000 | -0.369628000 |
| 6  | -4.082900000 | 3.220530000  | 2.357645000  | 6 | -1.462135000 | -5.668097000 | -0.197208000 |
| 6  | -2.375160000 | -0.371908000 | -2.758298000 | 1 | 7.419017000  | -0.644180000 | 0.697202000  |
| 6  | -2.495075000 | 0.055709000  | -4.080905000 | 1 | 6.090936000  | -0.116258000 | -1.332898000 |
| 6  | -3.417204000 | -1.085927000 | -2.180209000 | 1 | 3.784896000  | -0.993225000 | -1.576428000 |
| 6  | -3.643824000 | -0.207926000 | -4.798130000 | 1 | 4.155125000  | -3.003480000 | 2.198859000  |
| 1  | -1.688894000 | 0.586802000  | -4.546422000 | 1 | 6.438311000  | -2.090716000 | 2.466161000  |
| 6  | -4.571538000 | -1.347744000 | -2.904203000 | 1 | 1.891364000  | -2.323763000 | 2.204043000  |
| 1  | -3.315891000 | -1.451437000 | -1.177374000 | 1 | 2.657347000  | -3.023164000 | -1.966006000 |
| 6  | -4.686821000 | -0.908208000 | -4.207345000 | 1 | 0.362754000  | -3.871531000 | -2.234876000 |
| 6  | 0.457549000  | -0.236504000 | -2.985413000 | 1 | -0.381721000 | -3.202525000 | 1.933767000  |
| 6  | 0.452967000  | -1.369560000 | -3.798275000 | 1 | -1.910832000 | -3.941515000 | -1.401309000 |
| 6  | 1.458489000  | 0.706591000  | -3.169940000 | 1 | -1.108706000 | -5.906747000 | 0.815060000  |
| 6  | 1.433431000  | -1.566378000 | -4.749816000 | 1 | -0.755364000 | -6.100889000 | -0.917626000 |
| 1  | -0.332263000 | -2.090207000 | -3.696081000 | 1 | -2.443531000 | -6.136098000 | -0.321176000 |
| 6  | 2.445525000  | 0.506569000  | -4.125354000 | 6 | -2.674855000 | -3.567792000 | 0.540581000  |
| 1  | 1.484248000  | 1.601408000  | -2.587817000 | 8 | -3.512971000 | -4.302015000 | 1.038084000  |
| 6  | 2.440023000  | -0.628010000 | -4.912865000 | 8 | -2.642433000 | -2.274409000 | 0.676402000  |
| 8  | 0.530917000  | 4.512729000  | 0.561606000  | 1 | -5.327806000 | 1.583246000  | 1.788447000  |
| 8  | 2.798610000  | 2.874825000  | -1.063571000 | 1 | -2.596253000 | 4.657777000  | 2.882131000  |
| 8  | -1.085521000 | 5.762474000  | -0.475746000 | 1 | 1.407711000  | -2.441568000 | -5.368504000 |
| 8  | 4.622308000  | 2.237457000  | 0.167744000  | 1 | 3.204755000  | 1.251423000  | -4.262249000 |
| 29 | -1.047457000 | -1.236935000 | 0.148071000  | 1 | -3.727872000 | 0.124857000  | -5.813755000 |
| 6  | 0.127218000  | 5.835280000  | 0.257077000  | 1 | -5.367006000 | -1.899936000 | -2.445028000 |
| 1  | -0.038209000 | 6.391637000  | 1.185757000  | 1 | 0.255118000  | 0.197295000  | 6.709306000  |
| 1  | 0.899162000  | 6.325426000  | -0.359855000 | 1 | -2.290348000 | -2.873367000 | 5.222178000  |
| 6  | 4.380460000  | -1.254710000 | -0.700222000 | 1 | -1.130661000 | -1.794745000 | 7.106374000  |
| 6  | 5.667245000  | -0.750756000 | -0.554886000 | 1 | -4.901528000 | 3.896087000  | 2.509008000  |
| 6  | 6.411856000  | -1.041372000 | 0.584269000  | 1 | 3.199856000  | -0.776026000 | -5.654373000 |
| 6  | 5.859415000  | -1.845951000 | 1.576710000  | 1 | -5.577622000 | -1.113517000 | -4.767479000 |
| 6  | 4.573442000  | -2.353289000 | 1.430390000  |   |              |              |              |



**L3-CuH**

|    |              |              |              |    |              |              |              |
|----|--------------|--------------|--------------|----|--------------|--------------|--------------|
| 6  | 2.499089000  | -0.612447000 | -4.424516000 | 6  | -0.778690000 | -3.222465000 | 1.568280000  |
| 1  | 2.132874000  | -0.105292000 | -5.333541000 | 6  | -0.714257000 | -4.480100000 | 0.985658000  |
| 1  | 2.973898000  | -1.566092000 | -4.681951000 | 6  | -1.442130000 | -3.094732000 | 2.788285000  |
| 6  | -3.162500000 | -1.709186000 | -1.809624000 | 6  | -1.312545000 | -5.576413000 | 1.578403000  |
| 6  | -2.764284000 | -0.738683000 | -2.694267000 | 1  | -0.186852000 | -4.615605000 | 0.062381000  |
| 6  | -1.538046000 | -0.104374000 | -2.562880000 | 6  | -2.043856000 | -4.180553000 | 3.383190000  |
| 6  | -0.644426000 | -0.370681000 | -1.547071000 | 1  | -1.452559000 | -2.140771000 | 3.277429000  |
| 6  | -1.020150000 | -1.403315000 | -0.642405000 | 6  | -1.985539000 | -5.428457000 | 2.780700000  |
| 6  | -2.261205000 | -2.027623000 | -0.785327000 | 6  | 1.609417000  | -2.345783000 | 0.247065000  |
| 6  | 0.644426000  | 0.370681000  | -1.547071000 | 6  | 2.659843000  | -2.381858000 | 1.169801000  |
| 6  | 1.538046000  | 0.104374000  | -2.562880000 | 6  | 1.845699000  | -2.818165000 | -1.031277000 |
| 6  | 2.764284000  | 0.738683000  | -2.694267000 | 6  | 3.892946000  | -2.872391000 | 0.817982000  |
| 6  | 3.162500000  | 1.709186000  | -1.809624000 | 1  | 2.501858000  | -2.025392000 | 2.169813000  |
| 6  | 2.261205000  | 2.027623000  | -0.785327000 | 6  | 3.090542000  | -3.310886000 | -1.393653000 |
| 6  | 1.020150000  | 1.403315000  | -0.642405000 | 1  | 1.075276000  | -2.778850000 | -1.773576000 |
| 15 | 0.000000000  | -1.738791000 | 0.844357000  | 6  | 4.117545000  | -3.341880000 | -0.470804000 |
| 15 | 0.000000000  | 1.738791000  | 0.844357000  | 8  | -1.415566000 | 0.845044000  | -3.543043000 |
| 1  | -4.127319000 | -2.201172000 | -1.895943000 | 8  | 1.415566000  | -0.845044000 | -3.543043000 |
| 1  | -2.541247000 | -2.798848000 | -0.075086000 | 8  | -3.435610000 | -0.219303000 | -3.763618000 |
| 1  | 4.127319000  | 2.201172000  | -1.895943000 | 8  | 3.435610000  | 0.219303000  | -3.763618000 |
| 1  | 2.541247000  | 2.798848000  | -0.075086000 | 29 | 0.000000000  | 0.000000000  | 2.161659000  |
| 6  | 0.778690000  | 3.222465000  | 1.568280000  | 8  | -2.608794000 | -6.449723000 | 3.442043000  |
| 6  | 0.714257000  | 4.480100000  | 0.985658000  | 8  | -5.376968000 | 3.808460000  | -0.729642000 |
| 6  | 1.442130000  | 3.094732000  | 2.788285000  | 6  | -5.734662000 | 4.285073000  | -2.036309000 |
| 6  | 1.312545000  | 5.576413000  | 1.578403000  | 6  | -2.566551000 | -7.794663000 | 2.938488000  |
| 1  | 0.186852000  | 4.615605000  | 0.062381000  | 1  | -1.548310000 | -8.155906000 | 2.866671000  |
| 6  | 2.043856000  | 4.180553000  | 3.383190000  | 1  | -3.111483000 | -8.387032000 | 3.654696000  |
| 1  | 1.452559000  | 2.140771000  | 3.277429000  | 1  | -3.043449000 | -7.867447000 | 1.968942000  |
| 6  | 1.985539000  | 5.428457000  | 2.780700000  | 1  | -5.625247000 | 3.507118000  | -2.781803000 |
| 6  | -1.609417000 | 2.345783000  | 0.247065000  | 1  | -5.137148000 | 5.142598000  | -2.320048000 |
| 6  | -2.659843000 | 2.381858000  | 1.169801000  | 1  | -6.770120000 | 4.573987000  | -1.964202000 |
| 6  | -1.845699000 | 2.818165000  | -1.031277000 | 8  | 2.608794000  | 6.449723000  | 3.442043000  |
| 6  | -3.892946000 | 2.872391000  | 0.817982000  | 8  | 5.376968000  | -3.808460000 | -0.729642000 |
| 1  | -2.501858000 | 2.025392000  | 2.169813000  | 6  | 2.566551000  | 7.794663000  | 2.938488000  |
| 6  | -3.090542000 | 3.310886000  | -1.393653000 | 1  | 1.548310000  | 8.155906000  | 2.866671000  |
| 1  | -1.075276000 | 2.778850000  | -1.773576000 | 1  | 3.111483000  | 8.387032000  | 3.654696000  |
| 6  | -4.117545000 | 3.341880000  | -0.470804000 | 1  | 3.043449000  | 7.867447000  | 1.968942000  |
|    |              |              |              | 6  | 5.734662000  | -4.285073000 | -2.036309000 |

|   |              |              |              |   |              |              |              |
|---|--------------|--------------|--------------|---|--------------|--------------|--------------|
| 1 | 5.625247000  | -3.507118000 | -2.781803000 | 1 | 0.153191000  | -3.838103000 | -1.598104000 |
| 1 | 6.770120000  | -4.573987000 | -1.964202000 | 6 | -1.787406000 | -2.332299000 | -1.362004000 |
| 1 | 5.137148000  | -5.142598000 | -2.320048000 | 6 | -2.803308000 | -3.040798000 | -0.744904000 |
| 6 | -2.499089000 | 0.612447000  | -4.424516000 | 6 | -1.695606000 | -2.398400000 | -2.757104000 |
| 1 | -2.973898000 | 1.566092000  | -4.681951000 | 6 | -3.699409000 | -3.802996000 | -1.479404000 |
| 1 | -2.132874000 | 0.105292000  | -5.333541000 | 1 | -2.917207000 | -2.995498000 | 0.317796000  |
| 1 | 0.000000000  | 0.000000000  | 3.731169000  | 6 | -2.574308000 | -3.158498000 | -3.489704000 |
| 1 | 1.241366000  | 6.531874000  | 1.103277000  | 1 | -0.928206000 | -1.843901000 | -3.259404000 |
| 1 | 2.551485000  | 4.092125000  | 4.320178000  | 6 | -3.587309000 | -3.867996000 | -2.853804000 |
| 1 | -3.238993000 | 3.662711000  | -2.392744000 | 6 | -1.354904000 | -1.100400000 | 1.206596000  |
| 1 | -4.702230000 | 2.903761000  | 1.516288000  | 6 | -2.107402000 | 0.046001000  | 1.474196000  |
| 1 | 4.702230000  | -2.903761000 | 1.516288000  | 6 | -1.244306000 | -2.060900000 | 2.199496000  |
| 1 | 3.238993000  | -3.662711000 | -2.392744000 | 6 | -2.728102000 | 0.212002000  | 2.689296000  |
| 1 | -2.551485000 | -4.092125000 | 4.320178000  | 1 | -2.211001000 | 0.806101000  | 0.726496000  |
| 1 | -1.241366000 | -6.531874000 | 1.103277000  | 6 | -1.863506000 | -1.895299000 | 3.427496000  |

### L3-TS1<sub>sj</sub>

|    |              |              |              |    |              |              |              |
|----|--------------|--------------|--------------|----|--------------|--------------|--------------|
| 1  | 0.525498000  | -0.066503000 | -3.020604000 | 6  | -2.609804000 | -0.757698000 | 3.675996000  |
| 6  | 5.181392000  | -3.387711000 | 0.627496000  | 6  | 2.188403000  | 2.941394000  | -0.287204000 |
| 1  | 5.791891000  | -3.872712000 | 1.396496000  | 6  | 3.299304000  | 3.661192000  | -0.684504000 |
| 1  | 5.806493000  | -2.811613000 | -0.074304000 | 6  | 1.081504000  | 3.654996000  | 0.193896000  |
| 6  | 2.078399000  | 1.084094000  | 3.719996000  | 6  | 3.326306000  | 5.048192000  | -0.605604000 |
| 6  | 1.952797000  | -0.260906000 | 3.962096000  | 1  | 4.159803000  | 3.151290000  | -1.064004000 |
| 6  | 1.888896000  | -1.176306000 | 2.922596000  | 6  | 1.107806000  | 5.022596000  | 0.288596000  |
| 6  | 1.923096000  | -0.823306000 | 1.589996000  | 1  | 0.200103000  | 3.123297000  | 0.494196000  |
| 6  | 2.046399000  | 0.564994000  | 1.318696000  | 6  | 2.234807000  | 5.733494000  | -0.116204000 |
| 6  | 2.129000000  | 1.473394000  | 2.374896000  | 6  | 3.699899000  | 0.586591000  | -1.022604000 |
| 6  | 1.945394000  | -1.929606000 | 0.595596000  | 6  | 3.841498000  | 0.109491000  | -2.325604000 |
| 6  | 3.091193000  | -2.695408000 | 0.532196000  | 6  | 4.832199000  | 0.659889000  | -0.224004000 |
| 6  | 3.215291000  | -3.825708000 | -0.264904000 | 6  | 5.074397000  | -0.258911000 | -2.813504000 |
| 6  | 2.169790000  | -4.275706000 | -1.031404000 | 1  | 2.973498000  | 0.017492000  | -2.947804000 |
| 6  | 0.991892000  | -3.518204000 | -0.988004000 | 6  | 6.075998000  | 0.292087000  | -0.707804000 |
| 6  | 0.856994000  | -2.369804000 | -0.207604000 | 1  | 4.749799000  | 0.999889000  | 0.788896000  |
| 15 | 2.048400000  | 1.116194000  | -0.436004000 | 6  | 6.201997000  | -0.164513000 | -2.009504000 |
| 15 | -0.599505000 | -1.274802000 | -0.444504000 | 8  | 1.744793000  | -2.435206000 | 3.438696000  |
| 1  | 2.133301000  | 1.808994000  | 4.527496000  | 8  | 4.246493000  | -2.519910000 | 1.242996000  |
| 1  | 2.231702000  | 2.530394000  | 2.152796000  | 8  | 1.859196000  | -0.916606000 | 5.154796000  |
| 1  | 2.251889000  | -5.170606000 | -1.642304000 | 8  | 4.453090000  | -4.372910000 | -0.086904000 |
|    |              |              |              | 29 | 0.235498000  | 0.457097000  | -1.543804000 |



|    |               |              |              |   |              |              |              |
|----|---------------|--------------|--------------|---|--------------|--------------|--------------|
| 1  | -1.376207000  | 1.744370000  | 2.474664000  | 1 | -2.029161000 | 3.844489000  | -0.692090000 |
| 29 | -0.023409000  | -0.498091000 | -1.336730000 | 6 | -4.779765000 | 2.406357000  | 0.582115000  |
| 8  | 2.343103000   | 1.024540000  | 5.052110000  | 6 | 0.353833000  | 2.924544000  | -1.001476000 |
| 8  | 3.637057000   | 0.798609000  | 3.171625000  | 6 | 0.597808000  | 2.977432000  | -2.373561000 |
| 8  | 3.701770000   | 3.301385000  | 1.033764000  | 6 | 0.607277000  | 4.060912000  | -0.246284000 |
| 8  | 5.471358000   | 3.341843000  | -0.421811000 | 6 | 1.059774000  | 4.130854000  | -2.965429000 |
| 6  | -4.998509000  | -0.974563000 | -1.567431000 | 1 | 0.432965000  | 2.102896000  | -2.969840000 |
| 6  | -3.651214000  | -1.019814000 | -1.883295000 | 6 | 1.069578000  | 5.225546000  | -0.835501000 |
| 6  | -5.566699000  | -1.863618000 | -0.646613000 | 1 | 0.450204000  | 4.044121000  | 0.813337000  |
| 6  | -2.790804000  | -1.960984000 | -1.293057000 | 6 | 1.293940000  | 5.265400000  | -2.201389000 |
| 6  | -3.365459000  | -2.845898000 | -0.364831000 | 6 | 2.610472000  | -2.627542000 | -1.626408000 |
| 6  | -4.715545000  | -2.804229000 | -0.054726000 | 6 | 3.040132000  | -3.868871000 | -1.192158000 |
| 6  | -0.827574000  | -1.612583000 | -2.845933000 | 6 | 2.676836000  | -2.356998000 | -3.000554000 |
| 1  | -3.248552000  | -0.289183000 | -2.585937000 | 6 | 3.534981000  | -4.813380000 | -2.081020000 |
| 1  | -5.636320000  | -0.231666000 | -2.047162000 | 1 | 2.989398000  | -4.119723000 | -0.153810000 |
| 1  | -5.120844000  | -3.501315000 | 0.680121000  | 6 | 3.176819000  | -3.281808000 | -3.882050000 |
| 1  | -2.727261000  | -3.593581000 | 0.110236000  | 1 | 2.327732000  | -1.412303000 | -3.368157000 |
| 1  | -0.052595000  | -2.215631000 | -3.315034000 | 6 | 3.610560000  | -4.523285000 | -3.427388000 |
| 1  | -1.493359000  | -1.125136000 | -3.558240000 | 6 | 1.887644000  | -2.134857000 | 1.129876000  |
| 6  | -1.372884000  | -2.076628000 | -1.616653000 | 6 | 3.063826000  | -2.395715000 | 1.817314000  |
| 1  | -0.879809000  | -2.952794000 | -1.188709000 | 6 | 0.679562000  | -2.485278000 | 1.734065000  |
| 6  | -7.000701000  | -1.807491000 | -0.304720000 | 6 | 3.049391000  | -3.012763000 | 3.056657000  |
| 6  | -7.748699000  | -2.985062000 | -0.180453000 | 1 | 4.004910000  | -2.109883000 | 1.390260000  |
| 6  | -7.648686000  | -0.584211000 | -0.085914000 | 6 | 0.656571000  | -3.093979000 | 2.967410000  |
| 6  | -9.099116000  | -2.946731000 | 0.142187000  | 1 | -0.244264000 | -2.267109000 | 1.235533000  |
| 1  | -7.261213000  | -3.942038000 | -0.367723000 | 6 | 1.842323000  | -3.368319000 | 3.635056000  |
| 6  | -9.000752000  | -0.548629000 | 0.235467000  | 6 | 3.602319000  | 0.585025000  | 4.570288000  |
| 1  | -7.083202000  | 0.347023000  | -0.110968000 | 1 | 4.399309000  | 1.164946000  | 5.050002000  |
| 6  | -9.733702000  | -1.725658000 | 0.348189000  | 1 | 3.718365000  | -0.490418000 | 4.780239000  |
| 1  | -9.661594000  | -3.876032000 | 0.224086000  | 6 | 4.633062000  | 4.149918000  | 0.387601000  |
| 1  | -9.483103000  | 0.411592000  | 0.414689000  | 1 | 5.240229000  | 4.666610000  | 1.138933000  |
| 1  | -10.792583000 | -1.692454000 | 0.600282000  | 1 | 4.091351000  | 4.868458000  | -0.248734000 |
| 6  | -2.080015000  | 1.871930000  | 0.113056000  | 1 | 0.233050000  | -0.193710000 | -2.872719000 |
| 6  | -2.912343000  | 0.916947000  | 0.707517000  | 1 | -4.374430000 | 4.307252000  | -0.307237000 |
| 6  | -2.633657000  | 3.092087000  | -0.231569000 | 1 | 1.249501000  | 4.180878000  | -4.016724000 |
| 6  | -4.232127000  | 1.187109000  | 0.960794000  | 1 | 1.245827000  | 6.084773000  | -0.223147000 |
| 1  | -2.523386000  | -0.050498000 | 0.954297000  | 1 | -4.871547000 | 0.453894000  | 1.402373000  |
| 6  | -3.977289000  | 3.360461000  | -0.007704000 | 1 | 3.234926000  | -3.079668000 | -4.930799000 |

|   |              |              |              |    |              |              |              |
|---|--------------|--------------|--------------|----|--------------|--------------|--------------|
| 1 | 3.851793000  | -5.762789000 | -1.704250000 | 6  | 1.534984000  | 2.193148000  | 2.163606000  |
| 1 | -0.263635000 | -3.364854000 | 3.440057000  | 6  | 1.742648000  | 1.031184000  | 1.416743000  |
| 1 | 3.976158000  | -3.209243000 | 3.553545000  | 15 | -0.481853000 | -1.217625000 | -0.390510000 |
| 8 | -6.124908000 | 2.555213000  | 0.807242000  | 15 | 2.070416000  | 1.191985000  | -0.377419000 |
| 6 | -6.792949000 | 3.788771000  | 0.491366000  | 1  | 2.510153000  | -5.212084000 | 0.087753000  |
| 1 | -6.742643000 | 4.001933000  | -0.568824000 | 1  | 0.590239000  | -3.934486000 | -0.837871000 |
| 1 | -7.819568000 | 3.643727000  | 0.784133000  | 1  | 0.894918000  | 3.092557000  | 4.041489000  |
| 1 | -6.369205000 | 4.616466000  | 1.046032000  | 1  | 1.759468000  | 3.153550000  | 1.710306000  |
| 8 | 1.744988000  | 6.366564000  | -2.875704000 | 6  | 2.651977000  | 2.916045000  | -0.544288000 |
| 8 | 1.722043000  | -3.982428000 | 4.849860000  | 6  | 3.939776000  | 3.320030000  | -0.226561000 |
| 8 | 4.086023000  | -5.379494000 | -4.380327000 | 6  | 1.763666000  | 3.878420000  | -1.025846000 |
| 6 | 2.005360000  | 7.601146000  | -2.189339000 | 6  | 4.333748000  | 4.639203000  | -0.364264000 |
| 1 | 2.332614000  | 8.290337000  | -2.949992000 | 1  | 4.654430000  | 2.602961000  | 0.123251000  |
| 1 | 1.111649000  | 7.982900000  | -1.711820000 | 6  | 2.144572000  | 5.193097000  | -1.160648000 |
| 1 | 2.785507000  | 7.482728000  | -1.447259000 | 1  | 0.775096000  | 3.582274000  | -1.309346000 |
| 6 | 4.520958000  | -6.704624000 | -4.032646000 | 6  | 3.434751000  | 5.583650000  | -0.828914000 |
| 1 | 3.716207000  | -7.278110000 | -3.590152000 | 6  | 3.548293000  | 0.202991000  | -0.768178000 |
| 1 | 4.823995000  | -7.160655000 | -4.960456000 | 6  | 3.754902000  | -0.142789000 | -2.106766000 |
| 1 | 5.360812000  | -6.675825000 | -3.349714000 | 6  | 4.494918000  | -0.190042000 | 0.162078000  |
| 6 | 2.879468000  | -4.306646000 | 5.636767000  | 6  | 4.867146000  | -0.850555000 | -2.491523000 |
| 1 | 3.435541000  | -3.416395000 | 5.903862000  | 1  | 3.037314000  | 0.148756000  | -2.850350000 |
| 1 | 2.498819000  | -4.775693000 | 6.528702000  | 6  | 5.617346000  | -0.908363000 | -0.219457000 |
| 1 | 3.531678000  | -4.994461000 | 5.113323000  | 1  | 4.354584000  | 0.026899000  | 1.201673000  |

### L3-(S)-IM1

|   |              |              |              |   |              |              |              |
|---|--------------|--------------|--------------|---|--------------|--------------|--------------|
| 6 | -0.010589000 | -0.749273000 | 5.187380000  | 6 | 5.809110000  | -1.240219000 | -1.546859000 |
| 1 | 0.327257000  | -1.251366000 | 6.100164000  | 6 | -1.179440000 | -2.402672000 | -1.602219000 |
| 1 | -1.097612000 | -0.860906000 | 5.047615000  | 6 | -2.400090000 | -3.030304000 | -1.442030000 |
| 6 | 2.280673000  | -4.211383000 | 0.443387000  | 6 | -0.470794000 | -2.639184000 | -2.786670000 |
| 6 | 3.027128000  | -3.600687000 | 1.419859000  | 6 | -2.909028000 | -3.876034000 | -2.418586000 |
| 6 | 2.722443000  | -2.322046000 | 1.863433000  | 1 | -2.974680000 | -2.861425000 | -0.555465000 |
| 6 | 1.685908000  | -1.564696000 | 1.361843000  | 6 | -0.960729000 | -3.483985000 | -3.749897000 |
| 6 | 0.897654000  | -2.181063000 | 0.353305000  | 1 | 0.474525000  | -2.157277000 | -2.949800000 |
| 6 | 1.206041000  | -3.474140000 | -0.072324000 | 6 | -2.191536000 | -4.109440000 | -3.573208000 |
| 6 | 1.437363000  | -0.237933000 | 1.985495000  | 6 | -1.711886000 | -1.148579000 | 0.952798000  |
| 6 | 0.968907000  | -0.221697000 | 3.282665000  | 6 | -2.583956000 | -0.060888000 | 1.040379000  |
| 6 | 0.763993000  | 0.944664000  | 4.009131000  | 6 | -1.848908000 | -2.174986000 | 1.876496000  |
| 6 | 1.046355000  | 2.177128000  | 3.476342000  | 6 | -3.558914000 | -0.015064000 | 2.010758000  |
|   |              |              |              | 1 | -2.514445000 | 0.748935000  | 0.344016000  |
|   |              |              |              | 6 | -2.826908000 | -2.134589000 | 2.855299000  |

|    |              |              |              |                   |              |              |              |
|----|--------------|--------------|--------------|-------------------|--------------|--------------|--------------|
| 1  | -1.185702000 | -3.015604000 | 1.844662000  | 1                 | -2.906863000 | -2.947366000 | 3.546215000  |
| 6  | -3.688921000 | -1.052682000 | 2.923574000  | 1                 | -3.860789000 | -4.337154000 | -2.259942000 |
| 8  | 3.652170000  | -1.937722000 | 2.794501000  | 1                 | -0.424301000 | -3.671542000 | -4.655895000 |
| 8  | 0.664198000  | -1.298028000 | 4.068290000  | 1                 | 5.336433000  | 4.913204000  | -0.112912000 |
| 8  | 4.135074000  | -4.057718000 | 2.074584000  | 1                 | 1.469597000  | 5.935260000  | -1.531147000 |
| 8  | 0.317980000  | 0.628484000  | 5.258443000  | 1                 | 5.034482000  | -1.119074000 | -3.513080000 |
| 29 | 0.179425000  | 0.667957000  | -1.351643000 | 1                 | 6.323311000  | -1.204012000 | 0.527469000  |
| 6  | 4.344826000  | -3.127123000 | 3.123367000  | 8                 | 3.726523000  | 6.907532000  | -0.996845000 |
| 1  | 5.415159000  | -2.915182000 | 3.216824000  | 8                 | 6.879544000  | -1.945136000 | -2.021075000 |
| 1  | 3.944687000  | -3.538951000 | 4.065790000  | 8                 | -4.686729000 | -0.924357000 | 3.848927000  |
| 6  | -6.626063000 | 3.527969000  | -0.347670000 | 8                 | -2.599855000 | -4.926766000 | -4.589349000 |
| 6  | -7.878824000 | 3.696474000  | 0.227276000  | 6                 | 5.041371000  | 7.418776000  | -0.721449000 |
| 6  | -8.616593000 | 2.591648000  | 0.642087000  | 1                 | 4.993995000  | 8.470625000  | -0.949354000 |
| 6  | -8.082586000 | 1.317431000  | 0.477548000  | 1                 | 5.305583000  | 7.283628000  | 0.319925000  |
| 6  | -6.826650000 | 1.150605000  | -0.092225000 | 1                 | 5.786405000  | 6.943473000  | -1.347004000 |
| 6  | -6.072041000 | 2.251923000  | -0.519461000 | 6                 | 7.888832000  | -2.447206000 | -1.129469000 |
| 6  | -4.741276000 | 2.074861000  | -1.124286000 | 1                 | 8.589404000  | -2.974099000 | -1.755765000 |
| 6  | -3.711452000 | 3.002538000  | -0.911708000 | 1                 | 8.396223000  | -1.640152000 | -0.615801000 |
| 6  | -2.459253000 | 2.830397000  | -1.475927000 | 1                 | 7.465449000  | -3.128596000 | -0.402178000 |
| 6  | -2.144488000 | 1.725619000  | -2.296434000 | 6                 | -3.883419000 | -5.572714000 | -4.547568000 |
| 6  | -4.441606000 | 0.973240000  | -1.937301000 | 1                 | -4.685228000 | -4.847683000 | -4.487268000 |
| 6  | -3.191193000 | 0.803944000  | -2.509621000 | 1                 | -3.959221000 | -6.121891000 | -5.471281000 |
| 6  | -0.796211000 | 1.561204000  | -2.852749000 | 1                 | -3.951982000 | -6.256578000 | -3.710769000 |
| 6  | -0.712435000 | 0.786681000  | -4.157846000 | 6                 | -4.940809000 | -1.954758000 | 4.816183000  |
| 1  | -9.599703000 | 2.723107000  | 1.091233000  | 1                 | -4.088287000 | -2.103727000 | 5.467832000  |
| 1  | -8.287803000 | 4.699684000  | 0.341794000  | 1                 | -5.780101000 | -1.605847000 | 5.394436000  |
| 1  | -6.071979000 | 4.398072000  | -0.699295000 | 1                 | -5.192976000 | -2.892517000 | 4.336874000  |
| 1  | -6.401749000 | 0.151106000  | -0.182870000 |                   |              |              |              |
| 1  | -8.643404000 | 0.444037000  | 0.808409000  |                   |              |              |              |
| 1  | -5.224978000 | 0.245079000  | -2.152527000 |                   |              |              |              |
| 1  | -3.893467000 | 3.866517000  | -0.270658000 |                   |              |              |              |
| 1  | -1.682455000 | 3.574850000  | -1.286461000 |                   |              |              |              |
| 1  | -3.011121000 | -0.069472000 | -3.136139000 |                   |              |              |              |
| 1  | -0.354188000 | 2.558272000  | -2.998223000 |                   |              |              |              |
| 1  | -1.365556000 | 1.207480000  | -4.945388000 |                   |              |              |              |
| 1  | -0.994763000 | -0.268136000 | -4.048283000 |                   |              |              |              |
| 1  | 0.314619000  | 0.794415000  | -4.551117000 |                   |              |              |              |
| 1  | -4.239427000 | 0.807251000  | 2.070762000  |                   |              |              |              |
|    |              |              |              | <b>L3-(R)-IM1</b> |              |              |              |
|    |              |              |              | 6                 | 5.275023000  | -2.797446000 | 1.162892000  |
|    |              |              |              | 1                 | 5.873706000  | -3.187910000 | 1.992909000  |
|    |              |              |              | 1                 | 5.878383000  | -2.149004000 | 0.506835000  |
|    |              |              |              | 6                 | 1.418707000  | 1.218920000  | 3.918119000  |
|    |              |              |              | 6                 | 1.462741000  | -0.127701000 | 4.179975000  |
|    |              |              |              | 6                 | 1.576497000  | -1.055875000 | 3.155942000  |
|    |              |              |              | 6                 | 1.631582000  | -0.718577000 | 1.820217000  |
|    |              |              |              | 6                 | 1.576616000  | 0.669954000  | 1.527969000  |
|    |              |              |              | 6                 | 1.480955000  | 1.594279000  | 2.569640000  |

|    |              |              |              |    |              |              |              |
|----|--------------|--------------|--------------|----|--------------|--------------|--------------|
| 6  | 1.872994000  | -1.819278000 | 0.849461000  | 6  | 4.343036000  | 1.001757000  | -0.053874000 |
| 6  | 3.120445000  | -2.410638000 | 0.885324000  | 6  | 4.618804000  | 0.144720000  | -2.664294000 |
| 6  | 3.469186000  | -3.517370000 | 0.124754000  | 1  | 2.496816000  | 0.251577000  | -2.755847000 |
| 6  | 2.563501000  | -4.119452000 | -0.712242000 | 6  | 5.605793000  | 0.757449000  | -0.567250000 |
| 6  | 1.289935000  | -3.541337000 | -0.772532000 | 1  | 4.248439000  | 1.318202000  | 0.965701000  |
| 6  | 0.924636000  | -2.418209000 | -0.025934000 | 6  | 5.747696000  | 0.330359000  | -1.877496000 |
| 15 | 1.523720000  | 1.187244000  | -0.235211000 | 8  | 1.567463000  | -2.317129000 | 3.689704000  |
| 15 | -0.665741000 | -1.579390000 | -0.403769000 | 8  | 4.181007000  | -2.058022000 | 1.674781000  |
| 1  | 1.336112000  | 1.955020000  | 4.713054000  | 8  | 1.392645000  | -0.777264000 | 5.378795000  |
| 1  | 1.448606000  | 2.652427000  | 2.332391000  | 8  | 4.754376000  | -3.878406000 | 0.407378000  |
| 1  | 2.820817000  | -4.997121000 | -1.298699000 | 29 | 0.004955000  | 0.195639000  | -1.506976000 |
| 1  | 0.557381000  | -3.990658000 | -1.434366000 | 6  | 1.713494000  | -2.126463000 | 5.084224000  |
| 6  | -1.599410000 | -2.857142000 | -1.324348000 | 1  | 1.026787000  | -2.791236000 | 5.619702000  |
| 6  | -2.497226000 | -3.727840000 | -0.733808000 | 1  | 2.757898000  | -2.328528000 | 5.377683000  |
| 6  | -1.414608000 | -2.942277000 | -2.708192000 | 6  | -0.385931000 | 0.745403000  | -3.402382000 |
| 6  | -3.186054000 | -4.669264000 | -1.484034000 | 1  | -0.605430000 | -0.088302000 | -4.081392000 |
| 1  | -2.678673000 | -3.675579000 | 0.319807000  | 6  | 0.500045000  | 1.781917000  | -4.066506000 |
| 6  | -2.085117000 | -3.878159000 | -3.456667000 | 1  | 1.324124000  | 1.300789000  | -4.610760000 |
| 1  | -0.744550000 | -2.257824000 | -3.189860000 | 1  | -0.047599000 | 2.404744000  | -4.797390000 |
| 6  | -2.979609000 | -4.751523000 | -2.847042000 | 1  | 0.969193000  | 2.472371000  | -3.350504000 |
| 6  | -1.570790000 | -1.401674000 | 1.165928000  | 6  | -1.617297000 | 1.228365000  | -2.778406000 |
| 6  | -2.514515000 | -0.374075000 | 1.256814000  | 6  | -1.723235000 | 2.507895000  | -2.184133000 |
| 6  | -1.398421000 | -2.235574000 | 2.258282000  | 6  | -2.781647000 | 0.420886000  | -2.699259000 |
| 6  | -3.260752000 | -0.201245000 | 2.397804000  | 6  | -2.870904000 | 2.915254000  | -1.518930000 |
| 1  | -2.670716000 | 0.289041000  | 0.428610000  | 1  | -0.881320000 | 3.195297000  | -2.252144000 |
| 6  | -2.142816000 | -2.060697000 | 3.413689000  | 6  | -3.922907000 | 0.835653000  | -2.043507000 |
| 1  | -0.657617000 | -3.009536000 | 2.234701000  | 1  | -2.758693000 | -0.570446000 | -3.152068000 |
| 6  | -3.078170000 | -1.044598000 | 3.486736000  | 6  | -3.999297000 | 2.093757000  | -1.419627000 |
| 6  | 1.443485000  | 3.014836000  | -0.125135000 | 1  | -2.904004000 | 3.921094000  | -1.097395000 |
| 6  | 2.475520000  | 3.850618000  | -0.508924000 | 1  | -4.773332000 | 0.155393000  | -1.982777000 |
| 6  | 0.253634000  | 3.603826000  | 0.321842000  | 6  | -5.204124000 | 2.516810000  | -0.688033000 |
| 6  | 2.344122000  | 5.231991000  | -0.451244000 | 6  | -6.482596000 | 2.108790000  | -1.093415000 |
| 1  | 3.395741000  | 3.436146000  | -0.864176000 | 6  | -5.112199000 | 3.334070000  | 0.447816000  |
| 6  | 0.123331000  | 4.966821000  | 0.397268000  | 6  | -7.617145000 | 2.497608000  | -0.393710000 |
| 1  | -0.572274000 | 2.981597000  | 0.604781000  | 1  | -6.585324000 | 1.497737000  | -1.989737000 |
| 6  | 1.171540000  | 5.795525000  | 0.005946000  | 6  | -6.246747000 | 3.728244000  | 1.145688000  |
| 6  | 3.209432000  | 0.833774000  | -0.833912000 | 1  | -4.128537000 | 3.645206000  | 0.799743000  |
| 6  | 3.368436000  | 0.392826000  | -2.148464000 | 6  | -7.507361000 | 3.310646000  | 0.730545000  |

|   |              |              |              |    |              |              |              |
|---|--------------|--------------|--------------|----|--------------|--------------|--------------|
| 1 | -8.598223000 | 2.170727000  | -0.736302000 | 1  | -1.955540000 | -4.073493000 | -3.674583000 |
| 1 | -6.143717000 | 4.358522000  | 2.028230000  | 6  | -2.388509000 | -3.015358000 | 2.866985000  |
| 1 | -8.397023000 | 3.616094000  | 1.278741000  | 6  | -3.566362000 | -2.850610000 | 2.179248000  |
| 1 | -1.978537000 | -2.716266000 | 4.242593000  | 6  | -3.595017000 | -2.237314000 | 0.936080000  |
| 1 | -3.876143000 | -5.321750000 | -0.992408000 | 6  | -2.476001000 | -1.733851000 | 0.307902000  |
| 1 | -1.948932000 | -3.950821000 | -4.515061000 | 6  | -1.251275000 | -1.896071000 | 1.000228000  |
| 1 | -3.990637000 | 0.577315000  | 2.469833000  | 6  | -1.231500000 | -2.531273000 | 2.243885000  |
| 1 | 3.162882000  | 5.843832000  | -0.765604000 | 6  | -2.649811000 | -1.157520000 | -1.050024000 |
| 1 | -0.779470000 | 5.424927000  | 0.742545000  | 6  | -2.915542000 | -2.031777000 | -2.081257000 |
| 1 | 6.461037000  | 0.905524000  | 0.057983000  | 6  | -3.213242000 | -1.620140000 | -3.374225000 |
| 1 | 4.751589000  | -0.191582000 | -3.670636000 | 6  | -3.307758000 | -0.288876000 | -3.695212000 |
| 8 | 0.944046000  | 7.138539000  | 0.109254000  | 6  | -3.043465000 | 0.623477000  | -2.666517000 |
| 8 | 6.948577000  | 0.066125000  | -2.473977000 | 6  | -2.719791000 | 0.227936000  | -1.369179000 |
| 8 | -3.858330000 | -0.793638000 | 4.580891000  | 15 | 0.291480000  | -1.311538000 | 0.191470000  |
| 8 | -3.604502000 | -5.644343000 | -3.671836000 | 15 | -1.994736000 | 1.456341000  | -0.222895000 |
| 6 | 1.930261000  | 8.090897000  | -0.323298000 | 1  | -2.356219000 | -3.493359000 | 3.842152000  |
| 1 | 2.157636000  | 7.969187000  | -1.374807000 | 1  | -0.282282000 | -2.653816000 | 2.756114000  |
| 1 | 1.487544000  | 9.058840000  | -0.157095000 | 1  | -3.556038000 | 0.041143000  | -4.699859000 |
| 1 | 2.841352000  | 8.002885000  | 0.255258000  | 1  | -3.071073000 | 1.682977000  | -2.900689000 |
| 6 | 8.186002000  | 0.245339000  | -1.766321000 | 6  | -2.495110000 | 3.092392000  | -0.876096000 |
| 1 | 8.243483000  | -0.405360000 | -0.902305000 | 6  | -3.554994000 | 3.815546000  | -0.354896000 |
| 1 | 8.959572000  | -0.017640000 | -2.468374000 | 6  | -1.746330000 | 3.670077000  | -1.910715000 |
| 1 | 8.313980000  | 1.273187000  | -1.450843000 | 6  | -3.876743000 | 5.072780000  | -0.841143000 |
| 6 | -4.577129000 | -6.569751000 | -3.158746000 | 1  | -4.139255000 | 3.410921000  | 0.444740000  |
| 1 | -5.414798000 | -6.050442000 | -2.710465000 | 6  | -2.067548000 | 4.912839000  | -2.398864000 |
| 1 | -4.914858000 | -7.134475000 | -4.011814000 | 1  | -0.931552000 | 3.123065000  | -2.339182000 |
| 1 | -4.136776000 | -7.239044000 | -2.430235000 | 6  | -3.134570000 | 5.626772000  | -1.865994000 |
| 6 | -3.724814000 | -1.572661000 | 5.780212000  | 6  | -2.903156000 | 1.338727000  | 1.352544000  |
| 1 | -2.725960000 | -1.493242000 | 6.191056000  | 6  | -2.262175000 | 1.754510000  | 2.521449000  |
| 1 | -4.436209000 | -1.156581000 | 6.474204000  | 6  | -4.213293000 | 0.898608000  | 1.447734000  |
| 1 | -3.959105000 | -2.614757000 | 5.601267000  | 6  | -2.908989000 | 1.728580000  | 3.733573000  |

### L3-inner-TS2-I

|   |              |              |              |   |              |              |             |
|---|--------------|--------------|--------------|---|--------------|--------------|-------------|
| 6 | 1.239305000  | 1.092592000  | -2.226570000 | 1 | -4.725591000 | 0.545710000  | 0.575383000 |
| 8 | 0.126448000  | 1.290976000  | -2.723898000 | 6 | -4.221450000 | 1.279901000  | 3.815183000 |
| 8 | 2.290266000  | 0.581727000  | -2.525575000 | 6 | 1.514443000  | -1.451167000 | 1.547099000 |
| 6 | -2.982608000 | -3.809135000 | -3.373006000 | 6 | 2.621657000  | -2.273489000 | 1.484111000 |
| 1 | -3.665333000 | -4.655661000 | -3.496748000 | 6 | 1.370313000  | -0.620748000 | 2.666401000 |



|    |              |              |              |   |              |              |              |
|----|--------------|--------------|--------------|---|--------------|--------------|--------------|
| 6  | 3.571483000  | -2.276049000 | 2.497951000  | 1 | 9.738682000  | -0.566096000 | 0.627506000  |
| 1  | 2.764627000  | -2.914223000 | 0.638787000  | 1 | 5.399374000  | 0.535553000  | 1.331972000  |
| 6  | 2.297825000  | -0.626668000 | 3.675476000  | 1 | 6.045850000  | 3.369376000  | -1.829521000 |
| 1  | 0.514130000  | 0.022225000  | 2.745528000  | 1 | 3.610105000  | 3.614772000  | -2.092207000 |
| 6  | 3.414894000  | -1.455921000 | 3.595867000  | 1 | 2.980681000  | 0.769850000  | 1.050012000  |
| 6  | 0.691292000  | -2.679017000 | -0.953392000 | 6 | 1.070548000  | 2.989939000  | 0.631647000  |
| 6  | 1.518419000  | -2.452121000 | -2.058409000 | 1 | 1.682148000  | 3.861010000  | 0.921485000  |
| 6  | 0.214251000  | -3.965383000 | -0.742865000 | 1 | 1.122122000  | 2.294918000  | 1.482804000  |
| 6  | 1.851893000  | -3.483163000 | -2.906205000 | 1 | 0.038273000  | 3.341541000  | 0.533687000  |
| 1  | 1.903433000  | -1.473834000 | -2.260966000 | 1 | 1.452873000  | 3.190249000  | -1.437620000 |
| 6  | 0.545976000  | -5.003033000 | -1.596384000 | 1 | -4.700283000 | 5.601342000  | -0.409823000 |
| 1  | -0.433276000 | -4.169491000 | 0.083946000  | 1 | -1.506636000 | 5.359605000  | -3.192488000 |
| 6  | 1.370466000  | -4.765735000 | -2.682361000 | 1 | -5.878769000 | 0.511416000  | 2.704531000  |
| 8  | -4.891386000 | -2.159338000 | 0.502640000  | 1 | -2.426536000 | 2.046002000  | 4.633719000  |
| 8  | -2.981666000 | -3.396074000 | -2.016919000 | 1 | 2.483833000  | -3.317354000 | -3.752674000 |
| 8  | -4.835112000 | -3.189712000 | 2.548551000  | 1 | 0.157741000  | -5.980438000 | -1.401991000 |
| 8  | -3.440580000 | -2.716182000 | -4.153595000 | 1 | 4.419691000  | -2.921298000 | 2.410459000  |
| 29 | 0.153900000  | 0.816308000  | -0.476301000 | 1 | 2.196274000  | 0.000866000  | 4.535534000  |
| 6  | -5.617134000 | -3.000114000 | 1.379528000  | 8 | -3.370764000 | 6.855957000  | -2.413114000 |
| 1  | -6.565403000 | -2.522069000 | 1.647011000  | 8 | -4.781255000 | 1.282417000  | 5.060820000  |
| 1  | -5.794825000 | -3.975218000 | 0.895045000  | 8 | 1.755389000  | -5.722655000 | -3.578551000 |
| 6  | 8.226039000  | 2.890760000  | -0.199455000 | 8 | 4.285669000  | -1.386728000 | 4.644508000  |
| 6  | 9.599719000  | 2.755568000  | -0.044010000 | 6 | -4.439895000 | 7.687709000  | -1.933100000 |
| 6  | 10.152634000 | 1.515317000  | 0.259161000  | 1 | -4.395059000 | 8.585143000  | -2.527456000 |
| 6  | 9.316280000  | 0.412577000  | 0.402567000  | 1 | -5.401584000 | 7.208826000  | -2.068685000 |
| 6  | 7.942981000  | 0.549428000  | 0.244246000  | 1 | -4.305402000 | 7.935927000  | -0.887759000 |
| 6  | 7.371038000  | 1.791040000  | -0.058780000 | 6 | -6.109490000 | 0.775859000  | 5.277656000  |
| 6  | 5.912448000  | 1.937302000  | -0.224345000 | 1 | -6.282661000 | 0.868512000  | 6.336857000  |
| 6  | 5.375474000  | 2.810625000  | -1.175926000 | 1 | -6.844932000 | 1.358092000  | 4.736806000  |
| 6  | 4.003502000  | 2.944431000  | -1.326161000 | 1 | -6.184105000 | -0.263837000 | 4.984714000  |
| 6  | 3.106939000  | 2.221559000  | -0.535617000 | 6 | 5.520399000  | -2.124884000 | 4.632742000  |
| 6  | 5.016441000  | 1.208468000  | 0.564850000  | 1 | 6.023283000  | -1.857495000 | 5.546926000  |
| 6  | 3.645204000  | 1.349942000  | 0.413549000  | 1 | 5.339133000  | -3.192130000 | 4.614641000  |
| 6  | 1.634343000  | 2.406770000  | -0.687476000 | 1 | 6.133274000  | -1.847406000 | 3.784441000  |
| 1  | 11.229307000 | 1.408433000  | 0.381137000  | 6 | 1.340328000  | -7.089962000 | -3.429628000 |
| 1  | 10.242731000 | 3.628089000  | -0.151738000 | 1 | 1.792355000  | -7.618911000 | -4.252100000 |
| 1  | 7.798378000  | 3.870923000  | -0.409005000 | 1 | 1.687997000  | -7.507159000 | -2.492825000 |
| 1  | 7.296677000  | -0.324379000 | 0.325267000  | 1 | 0.262759000  | -7.183133000 | -3.485947000 |

**L3-inner-TS2-II**

|    |              |              |              |   |              |              |              |
|----|--------------|--------------|--------------|---|--------------|--------------|--------------|
|    |              |              |              | 1 | 2.673381000  | 0.015832000  | -2.938317000 |
| 8  | 0.923294000  | 3.991693000  | 0.237412000  | 6 | 4.713426000  | -2.495249000 | -0.886527000 |
| 6  | 0.068459000  | 3.152355000  | 0.409628000  | 1 | 4.152921000  | -1.359394000 | 0.812483000  |
| 8  | -0.599289000 | 2.665632000  | 1.311200000  | 6 | 4.617614000  | -2.643512000 | -2.256362000 |
| 29 | 0.289281000  | 1.229663000  | -0.485208000 | 6 | -1.336553000 | -1.540251000 | -1.676573000 |
| 15 | 2.497701000  | 0.939338000  | -0.271851000 | 6 | -0.473474000 | -1.687279000 | -2.769464000 |
| 15 | -0.682056000 | -0.765756000 | -0.149925000 | 6 | -2.654511000 | -1.925737000 | -1.833102000 |
| 1  | 2.976699000  | -4.250188000 | 4.127809000  | 6 | -0.920646000 | -2.198853000 | -3.961400000 |
| 6  | 3.510065000  | -3.945727000 | 3.211179000  | 1 | 0.559617000  | -1.415844000 | -2.673200000 |
| 6  | -0.048685000 | -0.302562000 | 5.247149000  | 6 | -3.114510000 | -2.440278000 | -3.038016000 |
| 6  | 2.019070000  | 2.059333000  | 3.596178000  | 6 | -2.252468000 | -2.577199000 | -4.106850000 |
| 6  | 1.307245000  | 1.006458000  | 4.113192000  | 6 | -2.008436000 | -0.896833000 | 1.093963000  |
| 6  | 1.110301000  | -0.162229000 | 3.386684000  | 6 | -2.551582000 | 0.255996000  | 1.660829000  |
| 6  | 1.557003000  | -0.339014000 | 2.095093000  | 6 | -2.488398000 | -2.130459000 | 1.518646000  |
| 6  | 2.288485000  | 0.750763000  | 1.534958000  | 6 | -3.547370000 | 0.165973000  | 2.609542000  |
| 6  | 2.489441000  | 1.911632000  | 2.286884000  | 1 | -2.179799000 | 1.218062000  | 1.381212000  |
| 6  | 1.392558000  | -1.684358000 | 1.485520000  | 6 | -3.489824000 | -2.224157000 | 2.464741000  |
| 6  | 2.170196000  | -2.709959000 | 1.979322000  | 1 | -2.070467000 | -3.034168000 | 1.122881000  |
| 6  | 2.132841000  | -4.008590000 | 1.494345000  | 6 | -4.025212000 | -1.069828000 | 3.015495000  |
| 6  | 1.285414000  | -4.364376000 | 0.473035000  | 8 | 0.754363000  | 0.863395000  | 5.351134000  |
| 6  | 0.463106000  | -3.350288000 | -0.032380000 | 8 | 0.458410000  | -1.072386000 | 4.170532000  |
| 6  | 0.494624000  | -2.040959000 | 0.452020000  | 8 | 3.184957000  | -2.605479000 | 2.895812000  |
| 1  | 2.182240000  | 2.973070000  | 4.160037000  | 8 | 3.084160000  | -4.757319000 | 2.126648000  |
| 1  | 3.001338000  | 2.751863000  | 1.825824000  | 1 | 4.592872000  | -4.041417000 | 3.337800000  |
| 1  | 1.263572000  | -5.373745000 | 0.071271000  | 1 | 0.022809000  | -0.878521000 | 6.174724000  |
| 1  | -0.219067000 | -3.594703000 | -0.841668000 | 1 | -1.090363000 | -0.013514000 | 5.030266000  |
| 6  | 3.810504000  | 2.192176000  | -0.492676000 | 1 | -3.341987000 | -1.813399000 | -1.021272000 |
| 6  | 3.531750000  | 3.431836000  | -1.067139000 | 6 | -0.826386000 | 2.830156000  | -1.437354000 |
| 6  | 5.129363000  | 1.907173000  | -0.160787000 | 6 | -2.277886000 | 2.545981000  | -1.305914000 |
| 6  | 4.538995000  | 4.341005000  | -1.302674000 | 6 | -2.936542000 | 1.551074000  | -2.037615000 |
| 1  | 2.523235000  | 3.702384000  | -1.284743000 | 6 | -3.062636000 | 3.318278000  | -0.435176000 |
| 6  | 6.142095000  | 2.818644000  | -0.385392000 | 6 | -4.299115000 | 1.327649000  | -1.892494000 |
| 1  | 5.380613000  | 0.959847000  | 0.271038000  | 1 | -2.379488000 | 0.938986000  | -2.744790000 |
| 6  | 5.849590000  | 4.042761000  | -0.965325000 | 6 | -4.422873000 | 3.101200000  | -0.294803000 |
| 6  | 3.310637000  | -0.536843000 | -0.969950000 | 1 | -2.582607000 | 4.100539000  | 0.153196000  |
| 6  | 3.234578000  | -0.691901000 | -2.356654000 | 6 | -5.074181000 | 2.093642000  | -1.017707000 |
| 6  | 4.068746000  | -1.444385000 | -0.252110000 | 1 | -4.777795000 | 0.561326000  | -2.502245000 |
| 6  | 3.875029000  | -1.727349000 | -2.992112000 | 1 | -4.992107000 | 3.707265000  | 0.410661000  |

|   |               |              |              |
|---|---------------|--------------|--------------|
| 6 | -0.170593000  | 2.377697000  | -2.744441000 |
| 1 | -0.673991000  | 2.843837000  | -3.608676000 |
| 1 | 0.881579000   | 2.689476000  | -2.777936000 |
| 1 | -0.200174000  | 1.293488000  | -2.930948000 |
| 6 | -6.520641000  | 1.850412000  | -0.865818000 |
| 6 | -7.416268000  | 2.906832000  | -0.660358000 |
| 6 | -7.040014000  | 0.551451000  | -0.923025000 |
| 6 | -8.778409000  | 2.673684000  | -0.518422000 |
| 1 | -7.036645000  | 3.928082000  | -0.638037000 |
| 6 | -8.401863000  | 0.316476000  | -0.785149000 |
| 1 | -6.354456000  | -0.286602000 | -1.046403000 |
| 6 | -9.279128000  | 1.377127000  | -0.581724000 |
| 1 | -9.455434000  | 3.513200000  | -0.366461000 |
| 1 | -8.780343000  | -0.704257000 | -0.824837000 |
| 1 | -10.346768000 | 1.194403000  | -0.471335000 |
| 1 | -0.699860000  | 3.917420000  | -1.417079000 |
| 1 | 7.144546000   | 2.563500000  | -0.114403000 |
| 1 | 4.332101000   | 5.295537000  | -1.737804000 |
| 1 | 5.276313000   | -3.188673000 | -0.298355000 |
| 1 | 3.824448000   | -1.852700000 | -4.053111000 |
| 1 | -3.973894000  | 1.044545000  | 3.044592000  |
| 1 | -3.832699000  | -3.190077000 | 2.769925000  |
| 1 | -0.266916000  | -2.319596000 | -4.799224000 |
| 1 | -4.142369000  | -2.723771000 | -3.121700000 |
| 8 | -5.009259000  | -1.059647000 | 3.963868000  |
| 8 | 6.780465000   | 5.005019000  | -1.236775000 |
| 8 | 5.211649000   | -3.646719000 | -2.969690000 |
| 8 | -2.605526000  | -3.069358000 | -5.330481000 |
| 6 | 8.166703000   | 4.809455000  | -0.912808000 |
| 1 | 8.580237000   | 3.963796000  | -1.447951000 |
| 1 | 8.664537000   | 5.713017000  | -1.223421000 |
| 1 | 8.305328000   | 4.665034000  | 0.151336000  |
| 6 | 5.988431000   | -4.661932000 | -2.311691000 |
| 1 | 6.322133000   | -5.321505000 | -3.095438000 |
| 1 | 6.845421000   | -4.234494000 | -1.806393000 |
| 1 | 5.388884000   | -5.214759000 | -1.599499000 |
| 6 | -3.963989000  | -3.447920000 | -5.613219000 |
| 1 | -3.963496000  | -3.773574000 | -6.639987000 |

|   |              |              |              |
|---|--------------|--------------|--------------|
| 1 | -4.286092000 | -4.259929000 | -4.973512000 |
| 1 | -4.636860000 | -2.607762000 | -5.497052000 |
| 6 | -5.612590000 | -2.280030000 | 4.422002000  |
| 1 | -4.886739000 | -2.921458000 | 4.906335000  |
| 1 | -6.362734000 | -1.979944000 | 5.134747000  |
| 1 | -6.080201000 | -2.818107000 | 3.606887000  |

**L3-inner-TS2-III**

|    |              |              |              |
|----|--------------|--------------|--------------|
| 29 | 0.174302000  | 0.263635000  | -1.663651000 |
| 15 | 1.802499000  | 1.022342000  | -0.345210000 |
| 15 | -0.771125000 | -1.449737000 | -0.475643000 |
| 1  | 4.460506000  | -3.342907000 | 3.961334000  |
| 6  | 4.267732000  | -3.028909000 | 2.929385000  |
| 6  | -0.209135000 | -1.003303000 | 5.254164000  |
| 6  | -0.051926000 | 1.938887000  | 3.235732000  |
| 6  | -0.016086000 | 0.719255000  | 3.864950000  |
| 6  | 0.496127000  | -0.404516000 | 3.233778000  |
| 6  | 1.018202000  | -0.390395000 | 1.956862000  |
| 6  | 1.097745000  | 0.887503000  | 1.338476000  |
| 6  | 0.517183000  | 1.996734000  | 1.957203000  |
| 6  | 1.379503000  | -1.695426000 | 1.344293000  |
| 6  | 2.420167000  | -2.421401000 | 1.880575000  |
| 6  | 2.780479000  | -3.686154000 | 1.433771000  |
| 6  | 2.092497000  | -4.313715000 | 0.426024000  |
| 6  | 1.010089000  | -3.612588000 | -0.123422000 |
| 6  | 0.639690000  | -2.340304000 | 0.307770000  |
| 1  | -0.504021000 | 2.809421000  | 3.702627000  |
| 1  | 0.509936000  | 2.948181000  | 1.432397000  |
| 1  | 2.366583000  | -5.305955000 | 0.078641000  |
| 1  | 0.434415000  | -4.090521000 | -0.910026000 |
| 6  | 2.306521000  | 2.772395000  | -0.544490000 |
| 6  | 2.298454000  | 3.297225000  | -1.841495000 |
| 6  | 2.793429000  | 3.578645000  | 0.475376000  |
| 6  | 2.722941000  | 4.582261000  | -2.087469000 |
| 1  | 1.998637000  | 2.681655000  | -2.665025000 |
| 6  | 3.216840000  | 4.873684000  | 0.233826000  |
| 1  | 2.836692000  | 3.211565000  | 1.480110000  |
| 6  | 3.177890000  | 5.384578000  | -1.051186000 |

|   |              |              |              |   |              |              |              |
|---|--------------|--------------|--------------|---|--------------|--------------|--------------|
| 6 | 3.394307000  | 0.122900000  | -0.269376000 | 6 | -3.923309000 | 1.399921000  | -1.745869000 |
| 6 | 3.658694000  | -0.922201000 | -1.155321000 | 1 | -3.105256000 | -0.108750000 | -3.021735000 |
| 6 | 4.388971000  | 0.490958000  | 0.623855000  | 6 | -2.446828000 | 3.157647000  | -1.071528000 |
| 6 | 4.880118000  | -1.556525000 | -1.148657000 | 1 | -0.463503000 | 3.094531000  | -1.878675000 |
| 1 | 2.911145000  | -1.250968000 | -1.845825000 | 6 | -3.727830000 | 2.592622000  | -1.034490000 |
| 6 | 5.618605000  | -0.141086000 | 0.634533000  | 1 | -4.910101000 | 0.937320000  | -1.750537000 |
| 1 | 4.219100000  | 1.282280000  | 1.324531000  | 1 | -2.242231000 | 4.066177000  | -0.504666000 |
| 6 | 5.871399000  | -1.166623000 | -0.261262000 | 6 | -1.099519000 | 0.086414000  | -4.651156000 |
| 6 | -1.643452000 | -2.727168000 | -1.472113000 | 1 | -1.980817000 | 0.545856000  | -5.127341000 |
| 6 | -1.083776000 | -3.139723000 | -2.690325000 | 1 | -0.332515000 | -0.047369000 | -5.423688000 |
| 6 | -2.869026000 | -3.261293000 | -1.109752000 | 1 | -1.386498000 | -0.916361000 | -4.311460000 |
| 6 | -1.717619000 | -4.070997000 | -3.476351000 | 6 | -4.823516000 | 3.226177000  | -0.278269000 |
| 1 | -0.159357000 | -2.713715000 | -3.021786000 | 6 | -4.900505000 | 4.619813000  | -0.156618000 |
| 6 | -3.517462000 | -4.191239000 | -1.909018000 | 6 | -5.822431000 | 2.457906000  | 0.334459000  |
| 6 | -2.940981000 | -4.607218000 | -3.091865000 | 6 | -5.930041000 | 5.221514000  | 0.554905000  |
| 6 | -1.883684000 | -1.184390000 | 0.950682000  | 1 | -4.155959000 | 5.240257000  | -0.654489000 |
| 6 | -2.530583000 | 0.035003000  | 1.132064000  | 6 | -6.853147000 | 3.059205000  | 1.045992000  |
| 6 | -2.126996000 | -2.197862000 | 1.868935000  | 1 | -5.769636000 | 1.371238000  | 0.278995000  |
| 6 | -3.410213000 | 0.220909000  | 2.175791000  | 6 | -6.912291000 | 4.444262000  | 1.161006000  |
| 1 | -2.345080000 | 0.846671000  | 0.462727000  | 1 | -5.971123000 | 6.307382000  | 0.627413000  |
| 6 | -3.014544000 | -2.022029000 | 2.914919000  | 1 | -7.610340000 | 2.438363000  | 1.522477000  |
| 1 | -1.618764000 | -3.136705000 | 1.773952000  | 1 | -7.719623000 | 4.915526000  | 1.718862000  |
| 6 | -3.666954000 | -0.809444000 | 3.067674000  | 1 | -3.340488000 | -2.956188000 | -0.200717000 |
| 8 | -0.489617000 | 0.378060000  | 5.095088000  | 1 | 3.575441000  | 5.464519000  | 1.050024000  |
| 8 | 0.335305000  | -1.491028000 | 4.041650000  | 1 | 2.722194000  | 4.984473000  | -3.078326000 |
| 8 | 3.233710000  | -2.060495000 | 2.915861000  | 1 | -4.464175000 | -4.575135000 | -1.592390000 |
| 8 | 3.829903000  | -4.145606000 | 2.171917000  | 1 | -1.292717000 | -4.393221000 | -4.403638000 |
| 1 | 5.172910000  | -2.605120000 | 2.467439000  | 1 | -3.910758000 | 1.154558000  | 2.318505000  |
| 1 | 0.521613000  | -1.138305000 | 6.066768000  | 1 | -3.185320000 | -2.829579000 | 3.595301000  |
| 1 | -1.138777000 | -1.540475000 | 5.480900000  | 1 | 6.364586000  | 0.178763000  | 1.331151000  |
| 8 | 1.256578000  | -1.240101000 | -3.328407000 | 1 | 5.091594000  | -2.354440000 | -1.828101000 |
| 6 | 1.318161000  | -0.024028000 | -3.475144000 | 8 | 3.567376000  | 6.649246000  | -1.389326000 |
| 8 | 2.053168000  | 0.822347000  | -3.918208000 | 8 | -4.568755000 | -0.541359000 | 4.059832000  |
| 6 | -0.579002000 | 0.939505000  | -3.514410000 | 8 | -3.493932000 | -5.522577000 | -3.942732000 |
| 1 | -0.045634000 | 1.819852000  | -3.883266000 | 8 | 7.055029000  | -1.848593000 | -0.333536000 |
| 6 | -1.629691000 | 1.408924000  | -2.570514000 | 6 | 4.094259000  | 7.552798000  | -0.403851000 |
| 6 | -2.906336000 | 0.815814000  | -2.481348000 | 1 | 4.992781000  | 7.156422000  | 0.052256000  |
| 6 | -1.431139000 | 2.593277000  | -1.828157000 | 1 | 4.328720000  | 8.457437000  | -0.939751000 |

|   |              |              |              |   |              |              |              |
|---|--------------|--------------|--------------|---|--------------|--------------|--------------|
| 1 | 3.362902000  | 7.765291000  | 0.365995000  | 1 | -1.506686000 | 2.893000000  | -2.026086000 |
| 6 | 8.184945000  | -1.458151000 | 0.462526000  | 6 | -2.731548000 | 5.174492000  | 0.319951000  |
| 1 | 7.983846000  | -1.578091000 | 1.520293000  | 1 | -1.196919000 | 3.835557000  | 0.770902000  |
| 1 | 8.984703000  | -2.118650000 | 0.171180000  | 6 | -4.772354000 | 4.262698000  | -0.532379000 |
| 1 | 8.469070000  | -0.431976000 | 0.266065000  | 1 | -4.829403000 | 2.161622000  | -0.749471000 |
| 6 | -4.766581000 | -6.124700000 | -3.655997000 | 6 | -5.035686000 | -1.020516000 | 2.059262000  |
| 1 | -4.961787000 | -6.791237000 | -4.479614000 | 1 | -3.324089000 | 0.134224000  | 2.523358000  |
| 1 | -4.735852000 | -6.687702000 | -2.731442000 | 6 | -5.555685000 | -1.254974000 | -0.265963000 |
| 1 | -5.549847000 | -5.379292000 | -3.597349000 | 1 | -4.229861000 | -0.304450000 | -1.617648000 |
| 6 | -4.903748000 | -1.530143000 | 5.045775000  | 6 | -2.304513000 | -4.345350000 | -0.310890000 |
| 1 | -4.035093000 | -1.821249000 | 5.623537000  | 1 | -0.826060000 | -3.953107000 | 1.189107000  |
| 1 | -5.625203000 | -1.059230000 | 5.692604000  | 6 | -2.494847000 | -2.591085000 | -1.948765000 |
| 1 | -5.341989000 | -2.409436000 | 4.590256000  | 6 | 0.039138000  | -2.910074000 | 4.300056000  |

### L3-outer-TS2- $\eta^1$

|    |              |              |              |   |              |              |              |
|----|--------------|--------------|--------------|---|--------------|--------------|--------------|
| 29 | -0.243798000 | 0.711980000  | 0.996383000  | 1 | 2.811677000  | -2.725190000 | 1.664411000  |
| 15 | -2.206453000 | 1.116284000  | 0.093687000  | 6 | 3.807076000  | -0.951278000 | -1.704398000 |
| 15 | 0.423410000  | -1.335288000 | 0.560941000  | 1 | 2.625035000  | 0.306579000  | -0.490889000 |
| 6  | -1.575178000 | 0.793481000  | -1.597959000 | 6 | 3.077957000  | -3.223983000 | -1.922139000 |
| 6  | -2.927877000 | 2.790630000  | -0.007300000 | 1 | 1.306567000  | -3.730471000 | -0.882662000 |
| 6  | -3.631091000 | 0.032918000  | 0.405127000  | 6 | -0.106742000 | 0.536355000  | -3.937336000 |
| 6  | -0.928466000 | -2.317986000 | -0.193272000 | 8 | -0.045999000 | -1.705909000 | -3.839525000 |
| 6  | 0.786077000  | -2.241101000 | 2.105483000  | 1 | -0.197202000 | 2.679068000  | -4.127991000 |
| 6  | 1.813400000  | -1.679325000 | -0.561556000 | 6 | -4.025409000 | 5.362023000  | -0.144928000 |
| 6  | -1.180843000 | -0.510381000 | -2.014636000 | 1 | -2.163434000 | 6.024772000  | 0.632089000  |
| 6  | -1.208970000 | 1.904322000  | -2.362933000 | 1 | -5.775758000 | 4.376358000  | -0.884293000 |
| 6  | -2.193005000 | 3.911250000  | 0.392383000  | 6 | -5.851710000 | -1.530124000 | 1.056108000  |
| 6  | -4.224600000 | 2.995561000  | -0.459157000 | 1 | -5.283921000 | -1.243479000 | 3.075240000  |
| 6  | -3.943226000 | -0.253534000 | 1.736318000  | 1 | -6.164038000 | -1.642233000 | -1.055502000 |
| 6  | -4.454570000 | -0.477216000 | -0.584238000 | 6 | -2.879168000 | -3.825512000 | -1.444960000 |
| 6  | -1.311411000 | -3.566481000 | 0.297981000  | 1 | -2.604743000 | -5.308125000 | 0.093313000  |
| 6  | -1.543562000 | -1.791166000 | -1.355942000 | 8 | -3.268965000 | -2.288921000 | -3.036970000 |
| 6  | -0.207063000 | -2.312556000 | 3.091662000  | 6 | 1.296013000  | -3.444029000 | 4.575473000  |
| 6  | 2.028036000  | -2.774133000 | 2.391952000  | 1 | -0.712702000 | -2.973316000 | 5.057955000  |
| 6  | 2.734470000  | -0.682151000 | -0.882490000 | 1 | 3.261913000  | -3.767543000 | 3.806059000  |
| 6  | 2.004865000  | -2.947147000 | -1.097538000 | 6 | 3.988210000  | -2.223892000 | -2.227291000 |
| 6  | -0.474736000 | -0.580824000 | -3.197016000 | 1 | 4.524945000  | -0.194529000 | -1.938175000 |
| 6  | -0.470477000 | 1.801767000  | -3.548562000 | 1 | 3.192354000  | -4.211437000 | -2.316474000 |



|   |              |              |              |   |              |              |              |
|---|--------------|--------------|--------------|---|--------------|--------------|--------------|
| 6 | -0.849708000 | -3.676166000 | -0.205088000 | 8 | 0.627272000  | -1.387933000 | -4.051420000 |
| 6 | -0.495575000 | -2.366067000 | -0.530503000 | 8 | -2.576322000 | -2.162166000 | -3.564251000 |
| 1 | 0.385302000  | 2.999597000  | -3.900309000 | 8 | -3.133518000 | -4.314452000 | -3.015790000 |
| 1 | -1.074384000 | 2.969860000  | -1.887017000 | 1 | -4.135474000 | -3.194527000 | -4.427886000 |
| 1 | -2.007070000 | -5.453452000 | -0.701596000 | 1 | 1.524307000  | -1.263543000 | -5.902114000 |
| 1 | -0.432770000 | -4.127671000 | 0.689514000  | 1 | 2.591231000  | -0.914910000 | -4.476569000 |
| 6 | -2.784311000 | 2.570017000  | -0.074507000 | 1 | 3.092487000  | -2.817646000 | 1.591821000  |
| 6 | -2.655372000 | 3.494116000  | 0.962636000  | 6 | 0.036958000  | 1.461154000  | 3.283201000  |
| 6 | -3.698340000 | 2.849216000  | -1.085536000 | 1 | -0.979419000 | 1.654452000  | 2.939788000  |
| 6 | -3.398832000 | 4.655089000  | 0.970316000  | 6 | 1.130202000  | 1.797233000  | 2.415606000  |
| 1 | -1.979272000 | 3.341736000  | 1.777826000  | 6 | 2.475562000  | 1.429082000  | 2.741366000  |
| 6 | -4.442463000 | 4.011124000  | -1.084692000 | 6 | 0.973268000  | 2.594179000  | 1.231111000  |
| 1 | -3.829010000 | 2.158327000  | -1.894443000 | 6 | 3.544373000  | 1.867216000  | 2.001805000  |
| 6 | -4.295378000 | 4.923494000  | -0.050350000 | 1 | 2.649780000  | 0.833742000  | 3.635978000  |
| 6 | -3.218058000 | -0.234229000 | 0.159034000  | 6 | 2.089553000  | 3.016039000  | 0.497745000  |
| 6 | -3.516199000 | -0.646737000 | 1.459715000  | 1 | 0.032445000  | 3.105062000  | 1.039384000  |
| 6 | -4.005927000 | -0.711857000 | -0.874164000 | 6 | 3.390899000  | 2.678856000  | 0.851750000  |
| 6 | -4.560895000 | -1.503988000 | 1.710217000  | 1 | 4.549576000  | 1.608737000  | 2.335790000  |
| 1 | -2.925019000 | -0.289840000 | 2.282232000  | 1 | 1.914933000  | 3.636853000  | -0.382157000 |
| 6 | -5.055595000 | -1.581026000 | -0.629923000 | 6 | 0.214980000  | 0.451942000  | 4.381202000  |
| 1 | -3.791086000 | -0.443028000 | -1.889074000 | 1 | 0.800645000  | 0.883003000  | 5.208462000  |
| 6 | -5.339362000 | -1.979687000 | 0.663281000  | 1 | -0.757134000 | 0.160787000  | 4.799209000  |
| 6 | 1.012091000  | -2.495132000 | 1.914501000  | 1 | 0.719081000  | -0.467874000 | 4.057981000  |
| 6 | -0.049947000 | -2.753097000 | 2.790865000  | 6 | 4.555419000  | 3.149270000  | 0.082452000  |
| 6 | 2.256380000  | -3.006162000 | 2.232683000  | 6 | 4.524219000  | 4.366532000  | -0.613144000 |
| 6 | 0.131317000  | -3.514360000 | 3.916082000  | 6 | 5.739371000  | 2.399365000  | 0.023585000  |
| 1 | -1.023389000 | -2.353094000 | 2.580946000  | 6 | 5.618567000  | 4.805530000  | -1.345967000 |
| 6 | 2.449781000  | -3.764134000 | 3.379785000  | 1 | 3.635394000  | 4.993428000  | -0.551139000 |
| 6 | 1.389576000  | -4.026380000 | 4.222262000  | 6 | 6.836784000  | 2.839861000  | -0.706210000 |
| 6 | 2.209900000  | -1.546761000 | -0.561905000 | 1 | 5.790268000  | 1.439212000  | 0.536132000  |
| 6 | 2.990649000  | -0.420928000 | -0.814970000 | 6 | 6.782983000  | 4.044893000  | -1.398667000 |
| 6 | 2.593769000  | -2.755069000 | -1.129458000 | 1 | 5.565646000  | 5.758828000  | -1.870252000 |
| 6 | 4.118793000  | -0.506659000 | -1.602121000 | 1 | 7.738942000  | 2.230384000  | -0.739058000 |
| 1 | 2.722257000  | 0.525275000  | -0.394152000 | 1 | 7.641998000  | 4.390804000  | -1.970950000 |
| 6 | 3.727631000  | -2.851166000 | -1.913009000 | 8 | -0.713100000 | 4.031901000  | 3.540043000  |
| 1 | 2.000425000  | -3.633085000 | -0.970506000 | 6 | -0.023827000 | 3.358967000  | 4.252101000  |
| 6 | 4.497752000  | -1.723360000 | -2.150983000 | 8 | 0.643786000  | 3.219898000  | 5.227000000  |
| 8 | 1.275804000  | 0.582549000  | -5.021454000 | 1 | -5.635324000 | -1.940786000 | -1.453380000 |

|   |              |              |              |   |              |              |              |
|---|--------------|--------------|--------------|---|--------------|--------------|--------------|
| 1 | -4.799375000 | -1.821474000 | 2.703253000  | 6 | -0.588210000 | -0.864607000 | -2.096506000 |
| 1 | -3.292893000 | 5.364382000  | 1.763208000  | 6 | -1.012310000 | 0.440066000  | -1.725036000 |
| 1 | -5.130368000 | 4.191904000  | -1.883304000 | 6 | -0.610001000 | 1.540926000  | -2.485966000 |
| 1 | 3.428540000  | -4.137122000 | 3.595026000  | 6 | -0.727731000 | -2.097095000 | -1.278434000 |
| 1 | -0.674239000 | -3.719703000 | 4.588755000  | 6 | -1.568153000 | -3.103195000 | -1.699277000 |
| 1 | 4.723462000  | 0.353446000  | -1.794329000 | 6 | -1.699681000 | -4.314596000 | -1.033606000 |
| 1 | 3.994652000  | -3.798154000 | -2.332008000 | 6 | -0.975722000 | -4.594911000 | 0.097755000  |
| 8 | -4.986144000 | 6.098016000  | 0.038550000  | 6 | -0.093594000 | -3.599011000 | 0.539149000  |
| 8 | -6.349842000 | -2.833603000 | 1.004130000  | 6 | 0.050627000  | -2.377987000 | -0.117544000 |
| 8 | 5.631747000  | -1.717403000 | -2.913533000 | 1 | 0.416631000  | 2.283531000  | -4.258683000 |
| 8 | 1.472079000  | -4.766945000 | 5.365694000  | 1 | -0.869087000 | 2.539719000  | -2.144771000 |
| 6 | -5.957001000 | 6.468108000  | -0.953950000 | 1 | -1.077563000 | -5.541759000 | 0.620596000  |
| 1 | -6.346266000 | 7.420075000  | -0.633380000 | 1 | 0.500923000  | -3.792222000 | 1.427005000  |
| 1 | -5.501482000 | 6.571988000  | -1.930900000 | 6 | -2.847542000 | 2.225617000  | -0.280989000 |
| 1 | -6.761313000 | 5.744977000  | -1.006432000 | 6 | -3.267008000 | 2.813046000  | 0.907058000  |
| 6 | -7.208904000 | -3.402988000 | 0.001910000  | 6 | -3.350763000 | 2.745153000  | -1.475836000 |
| 1 | -7.899410000 | -4.031637000 | 0.539121000  | 6 | -4.108488000 | 3.913524000  | 0.905363000  |
| 1 | -7.755197000 | -2.633942000 | -0.529675000 | 1 | -2.978633000 | 2.396826000  | 1.853945000  |
| 1 | -6.645551000 | -3.999880000 | -0.704368000 | 6 | -4.180534000 | 3.840996000  | -1.482161000 |
| 6 | 6.145269000  | -2.928184000 | -3.493634000 | 1 | -3.096997000 | 2.290622000  | -2.410867000 |
| 1 | 5.442005000  | -3.357825000 | -4.196271000 | 6 | -4.559771000 | 4.440911000  | -0.288159000 |
| 1 | 7.043976000  | -2.639115000 | -4.012485000 | 6 | -3.149104000 | -0.564433000 | 0.010574000  |
| 1 | 6.383423000  | -3.659351000 | -2.731387000 | 6 | -3.297603000 | -1.245558000 | 1.220002000  |
| 6 | 2.733915000  | -5.280120000 | 5.827310000  | 6 | -4.075483000 | -0.788273000 | -0.995198000 |
| 1 | 3.440119000  | -4.479239000 | 6.005710000  | 6 | -4.339431000 | -2.128187000 | 1.399207000  |
| 1 | 2.516584000  | -5.786024000 | 6.753092000  | 1 | -2.607078000 | -1.067061000 | 2.021248000  |
| 1 | 3.154735000  | -5.982138000 | 5.118422000  | 6 | -5.125597000 | -1.670288000 | -0.817273000 |

### L3-(S)-IM2

|    |              |              |              |   |              |              |              |
|----|--------------|--------------|--------------|---|--------------|--------------|--------------|
| 29 | -0.208987000 | 0.430715000  | 1.323117000  | 6 | -5.260293000 | -2.344333000 | 0.386143000  |
| 15 | -1.846293000 | 0.699438000  | -0.122437000 | 6 | 2.129253000  | -1.979409000 | 1.843405000  |
| 15 | 1.190864000  | -1.094727000 | 0.543827000  | 6 | 1.594248000  | -1.990542000 | 3.138292000  |
| 1  | -3.150905000 | -4.806868000 | -3.660103000 | 6 | 3.344189000  | -2.608871000 | 1.633154000  |
| 6  | -3.158874000 | -4.278482000 | -2.699087000 | 6 | 2.245139000  | -2.641365000 | 4.159431000  |
| 6  | 1.064582000  | -1.691861000 | -5.146665000 | 1 | 0.673544000  | -1.475880000 | 3.335575000  |
| 6  | 0.107720000  | 1.416310000  | -3.681843000 | 6 | 4.008926000  | -3.254570000 | 2.664209000  |
| 6  | 0.407598000  | 0.137897000  | -4.082862000 | 6 | 3.458052000  | -3.279592000 | 3.930766000  |
| 6  | 0.072786000  | -0.959606000 | -3.303893000 | 6 | 2.383522000  | -0.875634000 | -0.816185000 |
|    |              |              |              | 6 | 2.918403000  | 0.384657000  | -1.075314000 |



|   |              |              |              |   |              |              |              |
|---|--------------|--------------|--------------|---|--------------|--------------|--------------|
| 6 | 2.820804000  | -1.941736000 | -1.589964000 | 1 | 5.028455000  | 2.662637000  | 0.305042000  |
| 6 | 3.867816000  | 0.564033000  | -2.055307000 | 6 | 4.994168000  | 5.286822000  | -1.846454000 |
| 1 | 2.583930000  | 1.229370000  | -0.511320000 | 1 | 3.324133000  | 6.614879000  | -2.143934000 |
| 6 | 3.783402000  | -1.772109000 | -2.569832000 | 1 | 6.474471000  | 3.811910000  | -1.320973000 |
| 1 | 2.399574000  | -2.916135000 | -1.444098000 | 1 | 5.630177000  | 5.787658000  | -2.574068000 |
| 6 | 4.314916000  | -0.515777000 | -2.802693000 | 1 | 3.796247000  | -2.594658000 | 0.664057000  |
| 8 | 1.096521000  | -0.275291000 | -5.183868000 | 1 | -4.561481000 | 4.247218000  | -2.395571000 |
| 8 | 0.567609000  | -2.092294000 | -3.882859000 | 1 | -4.408351000 | 4.331030000  | 1.842986000  |
| 8 | -2.375034000 | -3.102314000 | -2.800264000 | 1 | 4.947825000  | -3.725490000 | 2.462692000  |
| 8 | -2.584112000 | -5.107162000 | -1.701843000 | 1 | 1.840261000  | -2.664583000 | 5.149445000  |
| 1 | -4.184732000 | -4.011039000 | -2.405376000 | 1 | 4.276465000  | 1.529703000  | -2.259579000 |
| 1 | 0.397137000  | -2.066187000 | -5.940387000 | 1 | 4.101867000  | -2.619710000 | -3.139442000 |
| 1 | 2.079635000  | -2.082949000 | -5.281328000 | 1 | -5.831881000 | -1.809322000 | -1.608705000 |
| 8 | -0.871641000 | -0.094518000 | 3.137773000  | 1 | -4.468298000 | -2.651896000 | 2.322448000  |
| 6 | -1.253996000 | 1.015669000  | 3.679266000  | 8 | -5.381766000 | 5.528524000  | -0.393712000 |
| 8 | -2.409706000 | 1.420477000  | 3.772521000  | 8 | -6.266567000 | -3.231896000 | 0.659518000  |
| 6 | -0.099225000 | 1.888684000  | 4.212016000  | 8 | 5.272973000  | -0.246157000 | -3.741061000 |
| 1 | -0.568539000 | 2.820393000  | 4.564683000  | 8 | 4.031589000  | -3.892460000 | 5.010384000  |
| 6 | 0.824461000  | 2.253267000  | 3.075406000  | 6 | -5.875071000 | 6.194307000  | 0.781458000  |
| 6 | 2.217833000  | 2.160931000  | 3.150985000  | 1 | -6.499504000 | 6.993867000  | 0.418446000  |
| 6 | 0.275951000  | 2.814671000  | 1.910436000  | 1 | -6.461525000 | 5.522949000  | 1.395678000  |
| 6 | 3.026121000  | 2.699873000  | 2.160151000  | 1 | -5.064000000 | 6.603846000  | 1.370257000  |
| 1 | 2.683944000  | 1.706389000  | 4.023148000  | 6 | -7.318826000 | -3.471455000 | -0.286257000 |
| 6 | 1.091392000  | 3.336511000  | 0.907676000  | 1 | -6.936189000 | -3.904484000 | -1.202809000 |
| 1 | -0.797719000 | 2.988303000  | 1.853030000  | 1 | -7.983020000 | -4.172408000 | 0.191876000  |
| 6 | 2.484163000  | 3.326631000  | 1.029794000  | 1 | -7.856359000 | -2.560476000 | -0.518374000 |
| 1 | 4.107173000  | 2.677747000  | 2.293743000  | 6 | 5.286966000  | -4.580228000 | 4.889666000  |
| 1 | 0.621232000  | 3.771707000  | 0.025076000  | 1 | 5.499885000  | -4.965945000 | 5.872915000  |
| 6 | 0.582393000  | 1.204962000  | 5.387281000  | 1 | 5.220841000  | -5.399099000 | 4.184113000  |
| 1 | 1.319962000  | 1.861007000  | 5.868147000  | 1 | 6.077413000  | -3.905947000 | 4.584293000  |
| 1 | -0.161312000 | 0.930748000  | 6.145456000  | 6 | 5.791706000  | -1.282220000 | -4.588910000 |
| 1 | 1.092738000  | 0.288410000  | 5.067863000  | 1 | 6.514898000  | -0.799492000 | -5.225118000 |
| 6 | 3.349005000  | 3.988810000  | 0.031250000  | 1 | 6.276442000  | -2.059571000 | -4.011376000 |
| 6 | 2.892298000  | 5.105808000  | -0.679839000 | 1 | 5.010683000  | -1.721702000 | -5.197174000 |
| 6 | 4.654025000  | 3.544010000  | -0.214290000 |   |              |              |              |
| 6 | 3.702319000  | 5.745145000  | -1.609037000 |   |              |              |              |
| 1 | 1.895898000  | 5.497625000  | -0.479457000 |   |              |              |              |
| 6 | 5.466848000  | 4.184151000  | -1.142531000 |   |              |              |              |

**L3-(R)-IM2**

|   |             |              |             |
|---|-------------|--------------|-------------|
| 6 | 2.156639000 | -3.170983000 | 3.651854000 |
| 1 | 2.375439000 | -3.340024000 | 4.711232000 |

|    |              |              |              |    |              |              |              |
|----|--------------|--------------|--------------|----|--------------|--------------|--------------|
| 1  | 3.065283000  | -3.289523000 | 3.034834000  | 6  | 3.368004000  | 4.722162000  | -0.855117000 |
| 6  | 0.551490000  | 3.054858000  | 3.379945000  | 1  | 3.683854000  | 3.002982000  | 0.342632000  |
| 6  | 0.007830000  | 2.037229000  | 4.122077000  | 6  | 1.412357000  | 4.690140000  | -2.239173000 |
| 6  | -0.138080000 | 0.765884000  | 3.590850000  | 1  | 0.217580000  | 2.937206000  | -2.130427000 |
| 6  | 0.227776000  | 0.416948000  | 2.305927000  | 6  | 2.551877000  | 5.340397000  | -1.790310000 |
| 6  | 0.835048000  | 1.447548000  | 1.533769000  | 6  | 3.018580000  | 0.333721000  | -0.001591000 |
| 6  | 0.961783000  | 2.726122000  | 2.083381000  | 6  | 3.920971000  | 0.379744000  | -1.070617000 |
| 6  | -0.058667000 | -0.993491000 | 1.922249000  | 6  | 3.421060000  | -0.315520000 | 1.150435000  |
| 6  | 0.622298000  | -2.002526000 | 2.573007000  | 6  | 5.153913000  | -0.216660000 | -0.993210000 |
| 6  | 0.346669000  | -3.352784000 | 2.411086000  | 1  | 3.654547000  | 0.907412000  | -1.963063000 |
| 6  | -0.650482000 | -3.781400000 | 1.572993000  | 6  | 4.668162000  | -0.926023000 | 1.235285000  |
| 6  | -1.366244000 | -2.783542000 | 0.901484000  | 1  | 2.784440000  | -0.361118000 | 2.006759000  |
| 6  | -1.124206000 | -1.418602000 | 1.078383000  | 6  | 5.537908000  | -0.882974000 | 0.165883000  |
| 15 | 1.387830000  | 1.161273000  | -0.204682000 | 8  | -0.798813000 | -0.022532000 | 4.496529000  |
| 15 | -1.888117000 | -0.211731000 | -0.046696000 | 8  | 1.642925000  | -1.858671000 | 3.477044000  |
| 1  | 0.644256000  | 4.064817000  | 3.768996000  | 8  | -0.517407000 | 2.071763000  | 5.379842000  |
| 1  | 1.388706000  | 3.514837000  | 1.475021000  | 8  | 1.171137000  | -4.084984000 | 3.217235000  |
| 1  | -0.848361000 | -4.838252000 | 1.413675000  | 29 | -0.291030000 | 0.410850000  | -1.451462000 |
| 1  | -2.142339000 | -3.093318000 | 0.207709000  | 6  | -0.779205000 | 0.715801000  | 5.703432000  |
| 6  | -3.420258000 | -0.938945000 | -0.722770000 | 1  | -1.753408000 | 0.637792000  | 6.197470000  |
| 6  | -4.304153000 | -1.742726000 | -0.020117000 | 1  | 0.022489000  | 0.333921000  | 6.358504000  |
| 6  | -3.793266000 | -0.506897000 | -1.999420000 | 6  | 2.291843000  | -4.273976000 | -0.203513000 |
| 6  | -5.495682000 | -2.163876000 | -0.585253000 | 6  | 2.514359000  | -5.405862000 | 0.571279000  |
| 1  | -4.076007000 | -2.047099000 | 0.982068000  | 6  | 1.725341000  | -6.539881000 | 0.403495000  |
| 6  | -4.980689000 | -0.913925000 | -2.561316000 | 6  | 0.712625000  | -6.533785000 | -0.551377000 |
| 1  | -3.158117000 | 0.175787000  | -2.530422000 | 6  | 0.491541000  | -5.402981000 | -1.328919000 |
| 6  | -5.834988000 | -1.756220000 | -1.863247000 | 6  | 1.276011000  | -4.256143000 | -1.166778000 |
| 6  | -2.589582000 | 1.165709000  | 0.914159000  | 6  | 1.034704000  | -3.047307000 | -1.975952000 |
| 6  | -2.770718000 | 2.365144000  | 0.218924000  | 6  | 2.105175000  | -2.282682000 | -2.462763000 |
| 6  | -3.043061000 | 1.078368000  | 2.216801000  | 6  | 1.879365000  | -1.133349000 | -3.197406000 |
| 6  | -3.380598000 | 3.437850000  | 0.824674000  | 6  | 0.583165000  | -0.664483000 | -3.456938000 |
| 1  | -2.437549000 | 2.446797000  | -0.799921000 | 6  | -0.258790000 | -2.627534000 | -2.282411000 |
| 6  | -3.652734000 | 2.159780000  | 2.831906000  | 6  | -0.487471000 | -1.450324000 | -2.997992000 |
| 1  | -2.899962000 | 0.177453000  | 2.780253000  | 6  | 0.373114000  | 0.506449000  | -4.386623000 |
| 6  | -3.824163000 | 3.342566000  | 2.137089000  | 6  | 0.437754000  | 0.049281000  | -5.839192000 |
| 6  | 1.889023000  | 2.815064000  | -0.801655000 | 1  | 1.900386000  | -7.425087000 | 1.012386000  |
| 6  | 3.036249000  | 3.470979000  | -0.371948000 | 1  | 3.303661000  | -5.400981000 | 1.322645000  |
| 6  | 1.086206000  | 3.442574000  | -1.755929000 | 1  | 2.886283000  | -3.373021000 | -0.042724000 |

|   |              |              |              |
|---|--------------|--------------|--------------|
| 1 | -0.286166000 | -5.412145000 | -2.092620000 |
| 1 | 0.097997000  | -7.420396000 | -0.700952000 |
| 1 | -1.115557000 | -3.203847000 | -1.932741000 |
| 1 | 3.127139000  | -2.604703000 | -2.267673000 |
| 1 | 2.724654000  | -0.574080000 | -3.597984000 |
| 1 | -1.504882000 | -1.200282000 | -3.291878000 |
| 1 | 1.198880000  | 1.218583000  | -4.200193000 |
| 1 | -0.362203000 | -0.675488000 | -6.042361000 |
| 1 | 1.399824000  | -0.429457000 | -6.065460000 |
| 1 | 0.286766000  | 0.901080000  | -6.509380000 |
| 6 | -0.918319000 | 1.306354000  | -4.104542000 |
| 8 | -1.577061000 | 1.746070000  | -5.032561000 |
| 8 | -1.189388000 | 1.487228000  | -2.845014000 |
| 1 | -3.527593000 | 4.361107000  | 0.305397000  |
| 1 | -3.983648000 | 2.065732000  | 3.844648000  |
| 1 | 5.847786000  | -0.175672000 | -1.806373000 |
| 1 | 4.945002000  | -1.407605000 | 2.149543000  |
| 1 | 4.258688000  | 5.198627000  | -0.503778000 |
| 1 | 0.802746000  | 5.176526000  | -2.971001000 |
| 1 | -6.149048000 | -2.792021000 | -0.017359000 |
| 1 | -5.274434000 | -0.585068000 | -3.535672000 |
| 8 | -6.984681000 | -2.120832000 | -2.507286000 |
| 8 | -4.412871000 | 4.463860000  | 2.657874000  |
| 8 | 2.796895000  | 6.572610000  | -2.324613000 |
| 8 | 6.784380000  | -1.445298000 | 0.152074000  |
| 6 | -7.967151000 | -2.945272000 | -1.860714000 |
| 1 | -8.350748000 | -2.471819000 | -0.965520000 |
| 1 | -8.762470000 | -3.061291000 | -2.578182000 |
| 1 | -7.561362000 | -3.917110000 | -1.607921000 |
| 6 | -4.902120000 | 4.480476000  | 4.007475000  |
| 1 | -5.306482000 | 5.468291000  | 4.155585000  |
| 1 | -5.682405000 | 3.743545000  | 4.153029000  |
| 1 | -4.104033000 | 4.303747000  | 4.718053000  |
| 6 | 3.953194000  | 7.335034000  | -1.941200000 |
| 1 | 3.894797000  | 8.249144000  | -2.508173000 |
| 1 | 3.941272000  | 7.562068000  | -0.882481000 |
| 1 | 4.868704000  | 6.811821000  | -2.187311000 |
| 6 | 7.297981000  | -2.132982000 | 1.304032000  |

|   |             |              |             |
|---|-------------|--------------|-------------|
| 1 | 6.684729000 | -2.989313000 | 1.556524000 |
| 1 | 8.284414000 | -2.464766000 | 1.025776000 |
| 1 | 7.363394000 | -1.472446000 | 2.159619000 |

#### L4-CuH

|    |              |              |              |
|----|--------------|--------------|--------------|
| 6  | 2.537173000  | -0.657854000 | -3.557437000 |
| 1  | 2.214393000  | -0.106055000 | -4.456314000 |
| 1  | 2.973354000  | -1.624707000 | -3.830645000 |
| 6  | -3.239670000 | -1.568676000 | -0.868369000 |
| 6  | -2.817247000 | -0.642648000 | -1.790158000 |
| 6  | -1.559380000 | -0.060205000 | -1.706685000 |
| 6  | -0.654995000 | -0.349583000 | -0.706021000 |
| 6  | -1.058038000 | -1.333979000 | 0.237710000  |
| 6  | -2.328676000 | -1.904249000 | 0.143684000  |
| 6  | 0.654995000  | 0.349583000  | -0.706021000 |
| 6  | 1.559380000  | 0.060205000  | -1.706685000 |
| 6  | 2.817247000  | 0.642648000  | -1.790158000 |
| 6  | 3.239670000  | 1.568676000  | -0.868369000 |
| 6  | 2.328676000  | 1.904249000  | 0.143684000  |
| 6  | 1.058038000  | 1.333979000  | 0.237710000  |
| 15 | 0.000000000  | -1.690263000 | 1.693086000  |
| 15 | 0.000000000  | 1.690263000  | 1.693086000  |
| 1  | -4.227731000 | -2.017495000 | -0.922571000 |
| 1  | -2.638008000 | -2.645983000 | 0.876515000  |
| 1  | 4.227731000  | 2.017495000  | -0.922571000 |
| 1  | 2.638008000  | 2.645983000  | 0.876515000  |
| 8  | -1.424496000 | 0.864390000  | -2.703235000 |
| 8  | 1.424496000  | -0.864390000 | -2.703235000 |
| 8  | -3.494983000 | -0.111781000 | -2.848568000 |
| 8  | 3.494983000  | 0.111781000  | -2.848568000 |
| 29 | 0.000000000  | 0.000000000  | 3.077937000  |
| 6  | -2.537173000 | 0.657854000  | -3.557437000 |
| 1  | -2.973354000 | 1.624707000  | -3.830645000 |
| 1  | -2.214393000 | 0.106055000  | -4.456314000 |
| 1  | 0.000000000  | 0.000000000  | 4.625445000  |
| 6  | 0.643023000  | 3.292457000  | 2.307439000  |
| 1  | 0.725342000  | 4.065304000  | 1.530912000  |
| 1  | -0.054930000 | 3.630795000  | 3.083266000  |

|   |              |              |             |    |              |              |              |
|---|--------------|--------------|-------------|----|--------------|--------------|--------------|
| 1 | 1.613454000  | 3.150275000  | 2.795790000 | 8  | -5.678728000 | 1.668842000  | -2.066390000 |
| 6 | -1.622563000 | 2.209340000  | 0.999718000 | 8  | -0.743912000 | 3.711060000  | 2.523918000  |
| 1 | -2.144261000 | 2.777908000  | 1.779770000 | 29 | -0.478584000 | -2.453174000 | -0.153787000 |
| 1 | -1.513478000 | 2.838438000  | 0.106095000 | 6  | -5.909764000 | 1.920198000  | -0.689701000 |
| 1 | -2.236022000 | 1.335718000  | 0.753215000 | 1  | -6.590543000 | 1.151300000  | -0.285084000 |
| 6 | 1.622563000  | -2.209340000 | 0.999718000 | 1  | -6.336471000 | 2.921233000  | -0.566333000 |
| 1 | 1.513478000  | -2.838438000 | 0.106095000 | 6  | 6.502476000  | 1.004440000  | 0.721719000  |
| 1 | 2.236022000  | -1.335718000 | 0.753215000 | 6  | 7.555826000  | 1.858731000  | 0.422488000  |
| 1 | 2.144261000  | -2.777908000 | 1.779770000 | 6  | 7.755804000  | 2.297521000  | -0.882767000 |
| 6 | -0.643023000 | -3.292457000 | 2.307439000 | 6  | 6.887341000  | 1.873338000  | -1.883833000 |
| 1 | -0.725342000 | -4.065304000 | 1.530912000 | 6  | 5.830744000  | 1.024214000  | -1.581623000 |
| 1 | 0.054930000  | -3.630795000 | 3.083266000 | 6  | 5.616980000  | 0.570112000  | -0.273434000 |
| 1 | -1.613454000 | -3.150275000 | 2.795790000 | 6  | 4.496494000  | -0.331153000 | 0.045168000  |

#### L4-TS1<sub>si</sub>

|    |              |              |              |   |              |              |              |
|----|--------------|--------------|--------------|---|--------------|--------------|--------------|
| 6  | -0.880441000 | 4.229060000  | 1.210586000  | 6 | 3.823161000  | -0.258752000 | 1.273589000  |
| 1  | -1.393066000 | 5.195492000  | 1.249061000  | 6 | 2.761786000  | -1.095578000 | 1.566198000  |
| 1  | 0.117618000  | 4.329075000  | 0.749646000  | 6 | 2.305839000  | -2.067056000 | 0.654592000  |
| 6  | -3.807719000 | 0.500792000  | -3.185314000 | 6 | 4.055310000  | -1.302567000 | -0.863909000 |
| 6  | -4.439355000 | 1.100915000  | -2.123350000 | 6 | 2.996241000  | -2.147493000 | -0.570914000 |
| 6  | -3.821671000 | 1.216706000  | -0.885618000 | 6 | 1.158173000  | -2.892654000 | 0.986762000  |
| 6  | -2.557382000 | 0.732853000  | -0.622713000 | 6 | 0.729659000  | -4.015722000 | 0.207461000  |
| 6  | -1.877051000 | 0.128079000  | -1.714057000 | 1 | 8.582954000  | 2.965026000  | -1.118352000 |
| 6  | -2.511712000 | 0.018616000  | -2.951821000 | 1 | 8.233699000  | 2.175004000  | 1.214257000  |
| 6  | -1.999303000 | 0.890532000  | 0.744149000  | 1 | 6.376067000  | 0.640521000  | 1.741136000  |
| 6  | -1.599426000 | 2.141882000  | 1.163642000  | 1 | 5.137545000  | 0.724653000  | -2.367805000 |
| 6  | -1.039859000 | 2.383850000  | 2.411210000  | 1 | 7.026983000  | 2.215704000  | -2.908437000 |
| 6  | -0.866932000 | 1.374641000  | 3.327070000  | 1 | 4.579950000  | -1.420340000 | -1.813210000 |
| 6  | -1.286181000 | 0.095545000  | 2.935159000  | 1 | 4.119561000  | 0.499232000  | 1.999546000  |
| 6  | -1.850994000 | -0.162838000 | 1.685413000  | 1 | 2.236693000  | -0.989595000 | 2.517870000  |
| 15 | -0.235873000 | -0.649197000 | -1.435916000 | 1 | 2.699596000  | -2.894305000 | -1.309217000 |
| 15 | -2.172027000 | -1.892164000 | 1.165526000  | 1 | 0.856119000  | -2.868600000 | 2.036467000  |
| 1  | -4.288323000 | 0.406239000  | -4.155255000 | 1 | 1.388165000  | -4.382596000 | -0.580002000 |
| 1  | -1.993989000 | -0.463346000 | -3.778077000 | 1 | -0.526913000 | -3.828337000 | -0.920761000 |
| 1  | -0.426586000 | 1.559992000  | 4.302985000  | 1 | 0.231256000  | -4.825431000 | 0.740132000  |
| 1  | -1.150294000 | -0.720921000 | 3.641581000  | 6 | 0.827524000  | 0.741905000  | -0.863335000 |
| 8  | -4.664187000 | 1.846938000  | -0.015810000 | 1 | 0.577018000  | 1.681075000  | -1.374870000 |
| 8  | -1.654759000 | 3.308826000  | 0.458339000  | 1 | 0.729267000  | 0.874886000  | 0.219931000  |
|    |              |              |              | 1 | 1.874153000  | 0.478564000  | -1.066890000 |
|    |              |              |              | 6 | 0.421193000  | -0.902723000 | -3.129244000 |

|   |              |              |              |    |              |              |              |
|---|--------------|--------------|--------------|----|--------------|--------------|--------------|
| 1 | -0.105181000 | -1.727819000 | -3.622257000 | 29 | 0.409844000  | -2.447494000 | -0.100877000 |
| 1 | 0.375742000  | 0.000560000  | -3.752454000 | 6  | 5.014854000  | 2.801231000  | -1.998493000 |
| 1 | 1.470733000  | -1.201955000 | -3.011765000 | 1  | 4.914501000  | 3.229765000  | -3.001360000 |
| 6 | -2.337942000 | -2.803017000 | 2.752617000  | 1  | 5.491837000  | 3.519592000  | -1.311058000 |
| 1 | -2.706050000 | -3.807532000 | 2.508764000  | 6  | -6.918970000 | 0.003315000  | -0.718082000 |
| 1 | -1.363004000 | -2.921826000 | 3.239049000  | 6  | -7.984740000 | 0.831858000  | -1.044886000 |
| 1 | -3.038393000 | -2.326176000 | 3.451159000  | 6  | -7.898257000 | 2.204689000  | -0.834466000 |
| 6 | -3.925652000 | -1.903179000 | 0.599223000  | 6  | -6.731298000 | 2.739340000  | -0.297138000 |
| 1 | -4.573994000 | -1.263581000 | 1.214091000  | 6  | -5.664447000 | 1.910021000  | 0.023175000  |
| 1 | -3.987666000 | -1.586383000 | -0.447257000 | 6  | -5.736889000 | 0.525112000  | -0.177257000 |
| 1 | -4.281534000 | -2.939874000 | 0.655079000  | 6  | -4.602079000 | -0.348388000 | 0.166119000  |

#### L4-TS1<sub>re</sub>

|    |              |              |              |   |              |              |              |
|----|--------------|--------------|--------------|---|--------------|--------------|--------------|
| 6  | 2.106955000  | 3.547941000  | 2.669796000  | 6 | -2.358062000 | -2.004489000 | 0.799729000  |
| 1  | 2.649697000  | 4.496468000  | 2.734634000  | 6 | -4.287065000 | -1.480521000 | -0.597111000 |
| 1  | 2.132877000  | 3.012884000  | 3.636038000  | 6 | -3.198011000 | -2.283650000 | -0.295142000 |
| 6  | 5.532944000  | -0.550999000 | -0.910777000 | 6 | -1.178379000 | -2.781999000 | 1.136949000  |
| 6  | 5.137968000  | 0.708344000  | -1.292287000 | 6 | -0.767643000 | -3.977190000 | 0.462694000  |
| 6  | 3.893408000  | 1.214741000  | -0.942023000 | 1 | -8.734621000 | 2.853846000  | -1.087980000 |
| 6  | 2.966942000  | 0.505591000  | -0.207006000 | 1 | -8.895770000 | 0.399753000  | -1.456810000 |
| 6  | 3.370342000  | -0.786402000 | 0.226434000  | 1 | -7.009550000 | -1.073936000 | -0.856206000 |
| 6  | 4.621865000  | -1.284700000 | -0.137718000 | 1 | -4.741569000 | 2.342036000  | 0.412515000  |
| 6  | 1.658272000  | 1.135623000  | 0.101958000  | 1 | -6.646427000 | 3.813338000  | -0.136511000 |
| 6  | 1.629219000  | 2.179689000  | 1.004403000  | 1 | -4.892250000 | -1.715969000 | -1.473730000 |
| 6  | 0.460632000  | 2.818476000  | 1.395485000  | 1 | -4.014216000 | 0.772345000  | 1.914127000  |
| 6  | -0.760024000 | 2.457686000  | 0.877845000  | 1 | -2.069404000 | -0.632837000 | 2.436434000  |
| 6  | -0.758395000 | 1.419650000  | -0.062718000 | 1 | -2.978444000 | -3.135661000 | -0.939866000 |
| 6  | 0.408118000  | 0.763786000  | -0.463160000 | 1 | -0.816445000 | -2.646452000 | 2.158849000  |
| 15 | 2.171322000  | -1.840854000 | 1.124890000  | 1 | -1.439990000 | -4.420460000 | -0.271932000 |
| 15 | 0.253147000  | -0.737031000 | -1.507153000 | 1 | -0.253806000 | -4.730862000 | 1.059509000  |
| 1  | 6.501502000  | -0.954656000 | -1.192885000 | 1 | 0.476379000  | -3.908981000 | -0.688647000 |
| 1  | 4.918333000  | -2.280028000 | 0.185589000  | 6 | -1.246383000 | -0.412501000 | -2.511898000 |
| 1  | -1.681707000 | 2.945908000  | 1.185005000  | 1 | -1.306746000 | -1.209384000 | -3.264093000 |
| 1  | -1.719763000 | 1.105762000  | -0.465173000 | 1 | -2.155118000 | -0.473040000 | -1.903049000 |
| 8  | 3.734491000  | 2.449087000  | -1.502980000 | 1 | -1.199799000 | 0.560115000  | -3.019268000 |
| 8  | 2.689941000  | 2.732481000  | 1.667221000  | 6 | 1.540756000  | -0.567436000 | -2.812734000 |
| 8  | 5.797709000  | 1.618509000  | -2.063995000 | 1 | 1.241029000  | -1.217718000 | -3.644489000 |
| 8  | 0.760702000  | 3.794432000  | 2.303292000  | 1 | 1.630502000  | 0.465524000  | -3.176506000 |

|   |             |              |              |
|---|-------------|--------------|--------------|
| 1 | 2.515186000 | -0.913826000 | -2.453210000 |
| 6 | 1.815862000 | -0.894018000 | 2.667388000  |
| 1 | 2.710505000 | -0.403638000 | 3.074808000  |
| 1 | 1.041122000 | -0.141799000 | 2.475588000  |
| 1 | 1.422157000 | -1.599301000 | 3.411190000  |
| 6 | 3.191952000 | -3.208582000 | 1.799223000  |
| 1 | 3.515500000 | -3.871835000 | 0.989126000  |
| 1 | 4.062627000 | -2.868342000 | 2.376034000  |
| 1 | 2.536814000 | -3.795429000 | 2.456749000  |

**L4-(S)-IM1**

|    |              |              |              |
|----|--------------|--------------|--------------|
| 29 | 0.232025000  | -2.185946000 | 0.412891000  |
| 15 | -1.049762000 | -1.234592000 | 1.924567000  |
| 15 | -0.225040000 | -1.011687000 | -1.408935000 |
| 1  | -6.052777000 | 2.360978000  | -0.723516000 |
| 6  | -5.891002000 | 1.416794000  | -0.177091000 |
| 6  | -1.330382000 | 4.493091000  | -0.593676000 |
| 6  | -0.094579000 | 2.765779000  | 2.256050000  |
| 6  | -0.727284000 | 3.284618000  | 1.152689000  |
| 6  | -1.497951000 | 2.486715000  | 0.318005000  |
| 6  | -1.671315000 | 1.131763000  | 0.512382000  |
| 6  | -1.045403000 | 0.579966000  | 1.663008000  |
| 6  | -0.272622000 | 1.395875000  | 2.491405000  |
| 6  | -2.498751000 | 0.375154000  | -0.461277000 |
| 6  | -3.860520000 | 0.594651000  | -0.479046000 |
| 6  | -4.729285000 | -0.063866000 | -1.338557000 |
| 6  | -4.272814000 | -0.986721000 | -2.247830000 |
| 6  | -2.888771000 | -1.210129000 | -2.270770000 |
| 6  | -2.001113000 | -0.550515000 | -1.419086000 |
| 1  | 0.513242000  | 3.386052000  | 2.908933000  |
| 1  | 0.227063000  | 0.961847000  | 3.355120000  |
| 1  | -4.949822000 | -1.514190000 | -2.914218000 |
| 1  | -2.504772000 | -1.927985000 | -2.991947000 |
| 8  | -0.747716000 | 4.570256000  | 0.696373000  |
| 8  | -2.009174000 | 3.250995000  | -0.691587000 |
| 8  | -4.578896000 | 1.398543000  | 0.359357000  |
| 8  | -6.010073000 | 0.324161000  | -1.075260000 |
| 1  | -6.619527000 | 1.305897000  | 0.633082000  |

|   |              |              |              |
|---|--------------|--------------|--------------|
| 1 | -2.044301000 | 5.313060000  | -0.723132000 |
| 1 | -0.536621000 | 4.537193000  | -1.359338000 |
| 6 | 1.353995000  | -3.850179000 | 0.580390000  |
| 1 | 1.296565000  | -4.171602000 | 1.627184000  |
| 6 | 2.283877000  | -2.762694000 | 0.375313000  |
| 6 | 3.008162000  | -2.537043000 | -0.833455000 |
| 6 | 2.432997000  | -1.747397000 | 1.370487000  |
| 6 | 3.738962000  | -1.386139000 | -1.040001000 |
| 1 | 2.998567000  | -3.309277000 | -1.603050000 |
| 6 | 3.172834000  | -0.594796000 | 1.141801000  |
| 1 | 2.022519000  | -1.930785000 | 2.365873000  |
| 6 | 3.827745000  | -0.364238000 | -0.072688000 |
| 1 | 4.301495000  | -1.282275000 | -1.969706000 |
| 1 | 3.223039000  | 0.158828000  | 1.929245000  |
| 6 | 1.336982000  | -4.990928000 | -0.401501000 |
| 1 | 2.284877000  | -5.560663000 | -0.428951000 |
| 1 | 0.538678000  | -5.702812000 | -0.157576000 |
| 1 | 1.143627000  | -4.651132000 | -1.430738000 |
| 6 | 4.574593000  | 0.876210000  | -0.328518000 |
| 6 | 5.205522000  | 1.577643000  | 0.709798000  |
| 6 | 4.678175000  | 1.407962000  | -1.622566000 |
| 6 | 5.898106000  | 2.756087000  | 0.467807000  |
| 1 | 5.176239000  | 1.171701000  | 1.720635000  |
| 6 | 5.377612000  | 2.582621000  | -1.867682000 |
| 1 | 4.183408000  | 0.899114000  | -2.450298000 |
| 6 | 5.990167000  | 3.267785000  | -0.823403000 |
| 1 | 6.383439000  | 3.273137000  | 1.294799000  |
| 1 | 5.435921000  | 2.971172000  | -2.883813000 |
| 1 | 6.536856000  | 4.189739000  | -1.013843000 |
| 6 | -0.667772000 | -1.418964000 | 3.711059000  |
| 1 | -1.324154000 | -0.815693000 | 4.352254000  |
| 1 | -0.801609000 | -2.480161000 | 3.956353000  |
| 1 | 0.376639000  | -1.164645000 | 3.923375000  |
| 6 | -2.825758000 | -1.717504000 | 1.923028000  |
| 1 | -2.904713000 | -2.675915000 | 2.451673000  |
| 1 | -3.460317000 | -0.972181000 | 2.421438000  |
| 1 | -3.182790000 | -1.870052000 | 0.898549000  |
| 6 | 0.676907000  | 0.574403000  | -1.652992000 |

|   |              |              |              |   |             |              |              |
|---|--------------|--------------|--------------|---|-------------|--------------|--------------|
| 1 | 0.189865000  | 1.218218000  | -2.397951000 | 6 | 1.384059000 | -3.907906000 | 0.158738000  |
| 1 | 0.776419000  | 1.113284000  | -0.704030000 | 1 | 1.434719000 | -4.514148000 | -0.752697000 |
| 1 | 1.691314000  | 0.321127000  | -1.988037000 | 6 | 1.289988000 | -4.750366000 | 1.410290000  |
| 6 | 0.033901000  | -1.800422000 | -3.044997000 | 1 | 0.425676000 | -5.426135000 | 1.364564000  |
| 1 | -0.449498000 | -2.783221000 | -3.079840000 | 1 | 2.184871000 | -5.377496000 | 1.574168000  |
| 1 | -0.314757000 | -1.183582000 | -3.884147000 | 1 | 1.160401000 | -4.147238000 | 2.320948000  |
| 1 | 1.114777000  | -1.963685000 | -3.142293000 | 6 | 2.306813000 | -2.789454000 | 0.105761000  |

#### L4-(R)-IM1

|    |              |              |              |   |              |              |              |
|----|--------------|--------------|--------------|---|--------------|--------------|--------------|
| 6  | -5.899926000 | 1.107245000  | 0.064133000  | 6 | 2.467035000  | -1.881877000 | 1.194445000  |
| 1  | -6.466620000 | 2.044053000  | 0.025177000  | 6 | 2.997006000  | -2.429551000 | -1.090028000 |
| 1  | -6.311332000 | 0.434327000  | 0.835702000  | 6 | 3.179445000  | -0.694526000 | 1.058996000  |
| 6  | -0.028980000 | 2.475927000  | 2.441165000  | 1 | 2.086303000  | -2.157986000 | 2.178077000  |
| 6  | -0.676587000 | 3.123994000  | 1.416940000  | 6 | 3.710992000  | -1.258671000 | -1.202705000 |
| 6  | -1.455747000 | 2.430800000  | 0.500570000  | 1 | 2.927401000  | -3.109668000 | -1.942031000 |
| 6  | -1.632388000 | 1.062766000  | 0.536400000  | 6 | 3.801540000  | -0.336061000 | -0.138131000 |
| 6  | -1.006161000 | 0.379129000  | 1.613797000  | 1 | 3.277973000  | -0.038936000 | 1.925904000  |
| 6  | -0.215996000 | 1.088991000  | 2.520218000  | 1 | 4.194619000  | -1.020973000 | -2.152398000 |
| 6  | -2.454171000 | 0.421681000  | -0.521650000 | 6 | 4.497170000  | 0.949593000  | -0.292670000 |
| 6  | -3.817058000 | 0.636346000  | -0.526070000 | 6 | 5.638087000  | 1.071349000  | -1.098434000 |
| 6  | -4.674349000 | 0.073734000  | -1.461469000 | 6 | 4.028953000  | 2.103180000  | 0.353604000  |
| 6  | -4.205714000 | -0.733448000 | -2.469119000 | 6 | 6.284669000  | 2.291002000  | -1.248602000 |
| 6  | -2.821257000 | -0.953158000 | -2.501222000 | 1 | 6.038600000  | 0.184637000  | -1.589723000 |
| 6  | -1.945384000 | -0.393889000 | -1.569603000 | 6 | 4.679234000  | 3.321861000  | 0.209342000  |
| 15 | -1.037863000 | -1.453379000 | 1.690432000  | 1 | 3.122181000  | 2.041994000  | 0.957058000  |
| 15 | -0.170674000 | -0.860786000 | -1.582811000 | 6 | 5.811063000  | 3.424308000  | -0.593823000 |
| 1  | 0.593126000  | 3.012464000  | 3.152529000  | 1 | 7.174489000  | 2.354623000  | -1.873785000 |
| 1  | 0.282221000  | 0.556416000  | 3.327865000  | 1 | 4.290177000  | 4.202882000  | 0.718545000  |
| 1  | -4.874149000 | -1.176916000 | -3.202031000 | 1 | 6.319425000  | 4.380033000  | -0.709920000 |
| 1  | -2.427855000 | -1.590909000 | -3.289631000 | 6 | -0.707545000 | -1.811867000 | 3.462429000  |
| 8  | -1.920342000 | 3.298853000  | -0.444535000 | 1 | -0.891688000 | -2.883249000 | 3.612076000  |
| 8  | -4.540296000 | 1.385234000  | 0.357631000  | 1 | 0.339769000  | -1.621401000 | 3.721849000  |
| 8  | -0.649769000 | 4.445758000  | 1.084105000  | 1 | -1.357192000 | -1.238452000 | 4.137095000  |
| 8  | -5.954252000 | 0.467156000  | -1.200045000 | 6 | -2.819803000 | -1.912037000 | 1.613638000  |
| 29 | 0.249069000  | -2.252131000 | 0.091140000  | 1 | -2.915844000 | -2.913822000 | 2.051277000  |
| 6  | -1.603215000 | 4.592195000  | 0.042983000  | 1 | -3.455141000 | -1.209794000 | 2.170895000  |
| 1  | -1.172903000 | 5.192745000  | -0.765871000 | 1 | -3.161690000 | -1.967870000 | 0.574843000  |
| 1  | -2.513587000 | 5.068922000  | 0.442637000  | 6 | 0.729618000  | 0.742694000  | -1.639333000 |
|    |              |              |              | 1 | 0.254171000  | 1.459310000  | -2.322150000 |
|    |              |              |              | 1 | 0.797224000  | 1.179025000  | -0.636728000 |

|   |              |              |              |   |              |              |              |
|---|--------------|--------------|--------------|---|--------------|--------------|--------------|
| 1 | 1.755114000  | 0.537250000  | -1.972397000 | 1 | -0.243768000 | -0.778561000 | -4.063331000 |
| 6 | 0.110955000  | -1.472031000 | -3.289153000 | 1 | 1.194992000  | -1.603413000 | -3.396051000 |
| 1 | -0.353454000 | -2.455171000 | -3.425688000 |   |              |              |              |
